# Supplementary material for: Seasonal monitoring of deep-sea megabenthos in Barkley Canyon cold seep by internet operated vehicle (IOV)
Source: PLoS One. 2017 May 30;12(5):e0176917. doi: 10.1371/journal.pone.0176917 (PMC5448723; doi:10.1371/journal.pone.0176917)
Supplement: S3 Table — (XLSX) [file pone.0176917.s003.xlsx]

## Sheet: Hoja1
Local_date	Local_hour	Min transect	Sebastidae	Eptatretus stoutii	Lithodes couesi	Chionnecetes tanneri	small crab	Buccinoidea	Grimpoteuthis sp.	Ophiuroidea	Pannichia moseleyi	Embassichthys bathybius	Microstomus pacificus	Hippoglossus stenolepis	Licenchelys sp.	Solmissus sp.	Poralia rufescens	Voragonema pedunculata	Salpidae	Asteroidea	Zoroasteridae	Hippasteria sp.	Anoplopoma fimbria	Diogenidae	Coryphaenoides sp.	Gonatus sp.	Bolinopsis infundibulum	Flow_direction_deg	Flow_magnitude_m_s	Oxygen_ml_l	Pressure_dbar	Sigma_t	Temperature_celsius	Turbidity_ftu	Bakun_Index_m3/s·100m
2013-02-14	15:00:00	17	2	10	0	0	0	2	0	0	0	0	0	0	0	0	0	0	0	0	0	0	0	0	0	0	0	176.43	0.11		904.12	27.318	3.8	0.54	-9
2013-02-14	19:00:00	9	1	2	0	0	0	4	1	0	0	0	0	0	0	0	0	0	0	0	0	0	0	0	0	0	0	205.51	0.06		904.28	27.3141	3.87	0.64	-9
2013-02-15	23:00:00	18	0	3	0	0	0	2	0	1	0	0	1	0	1	0	0	0	0	0	0	0	0	0	0	0	0	98.45	0.04		903.07	27.3252	3.85	0.5	2
2013-02-15	03:00:00	14	4	6	0	0	0	1	0	0	1	0	0	0	0	1	0	0	0	0	0	0	0	0	0	0	0	166.3	0.1		904.36	27.3372	3.77	0.75	2
2013-02-15	07:00:00	16	0	2	0	0	0	3	0	0	0	0	0	0	0	0	4	0	0	0	0	0	0	0	0	0	0	233.73	0.19		904.75	27.333	3.87	0.79	2
2013-02-15	11:00:00	13	0	3	0	0	0	2	0	0	0	0	0	0	0	0	0	0	0	0	0	0	0	0	0	0	0	140.88	0.07		903.15	27.2931	3.91	1.04	2
2013-02-15	15:00:00	12	1	5	0	0	0	1	0	0	0	0	0	0	0	0	0	0	0	0	0	0	0	0	0	0	0	159.05	0.07		903.72	27.3061	3.83	0.52	2
2013-02-15	19:00:00	15	3	1	0	2	0	4	1	0	1	0	0	0	0	0	0	0	0	0	1	0	0	0	0	0	0	213.37	0.08		904.33	27.2993	3.91	0.85	2
2013-02-16	23:00:00	13	1	4	0	0	0	1	0	0	0	0	0	0	0	0	0	0	0	0	0	0	0	0	0	0	0	223.01	0.03		903.35	27.3159	3.84	1.07	2
2013-02-16	03:00:00	17	0	1	1	0	0	1	0	0	0	0	0	0	0	0	2	0	0	0	0	0	0	0	0	0	0	210.18	0.1		904.14	27.3423	3.79	0.74	77
2013-02-16	07:00:00	21	0	5	0	0	0	1	0	0	0	0	0	0	0	0	1	0	0	0	2	0	0	0	0	0	0	234.64	0.22		904.85	27.3259	3.91	0.56	77
2013-02-16	11:00:00	18	1	1	0	1	1	1	0	0	0	0	0	0	0	0	1	0	0	0	0	0	0	0	0	0	0	235.25	0.05		903.44	27.2754	3.92	0.68	77
2013-02-16	15:00:00	16	1	1	0	1	0	1	0	0	0	0	0	0	0	0	0	0	0	0	1	0	0	0	0	0	0	201.08	0.06		903.39	27.3261	3.86	0.59	77
2013-02-16	19:00:00	15	0	1	0	0	0	1	0	0	0	0	0	0	0	0	3	0	0	0	0	0	0	0	0	0	0	239.39	0.17		904.2	27.3275	3.91	1.09	77
2013-02-17	23:00:00	15	1	1	1	2	1	0	0	0	0	0	0	0	2	0	0	0	0	0	0	0	0	0	0	0	0	72.55	0.05		903.63	27.3012	3.83	0.74	77
2013-02-17	03:00:00	7	0	0	0	0	0	0	0	0	0	0	0	0	0	0	0	0	0	0	0	0	0	0	0	0	0	209.82	0.08		903.97	27.3348	3.8	0.68	9
2013-02-17	07:00:00	23	2	4	0	2	1	5	0	1	0	0	0	0	0	0	2	1	0	0	0	0	0	0	0	0	0	231.62	0.16		904.82	27.3317	3.91	1.06	9
2013-02-17	11:00:00	14	0	2	0	1	0	3	0	1	0	0	0	0	0	0	0	0	0	0	0	0	0	0	0	0	0	223.26	0.09		903.76	27.3014	3.92	0.64	9
2013-02-17	15:00:00	14	0	2	0	1	0	2	0	0	0	0	0	0	2	0	0	0	0	0	0	0	0	0	0	0	0	127.58	0.05		903.19	27.2884	3.91	1.19	9
2013-02-17	19:00:00	8	0	1	0	0	0	3	0	0	0	0	0	0	0	0	0	0	0	0	0	0	0	1	0	0	0	304.24	0.08		904.01	27.3089	3.93	1.91	9
2013-02-17	23:00:00	15	2	1	0	0	0	2	0	0	0	0	0	0	0	0	0	0	0	0	0	0	0	0	0	0	0	152.43	0.04		903.88	27.3164	3.81	0.7	9
2013-02-18	03:00:00	14	0	2	1	0	0	1	0	0	0	0	0	0	0	0	0	0	0	0	0	0	0	0	0	0	0	212.44	0.08		903.9	27.3137	3.87	0.33	-60
2013-02-18	07:00:00	16	1	5	0	1	0	0	0	0	0	0	0	0	0	1	2	0	0	0	0	0	0	0	0	0	0	234.68	0.17		904.73	27.3135	3.9	0.86	-60
2013-02-18	11:00:00	17	0	5	1	0	1	1	0	0	0	0	0	0	0	0	0	0	0	0	0	0	0	0	0	0	0	150.55	0.07		904.13	27.2832	3.96	0.74	-60
2013-02-18	15:00:00	15	0	0	0	0	0	0	0	0	0	0	0	0	0	0	0	0	0	0	0	0	2	0	0	0	0	153.31	0.04		903.14	27.299	3.9	0.26	-60
2013-02-18	19:00:00																											199.36	0.08		903.71	27.3212	3.92	0.26	-60
2013-02-18	23:00:00																											243.13	0.08		904.05	27.307	3.84	0.26	-60
2013-02-19	03:00:00																											186.1	0.06		903.86	27.3048	3.86	0.27	14
2013-02-19	07:00:00																											227.75	0.13		904.53	27.3045	3.96	0.18	14
2013-02-19	11:00:00																											216.74	0.09		904.41	27.2828	3.98	0.18	14
2013-02-19	15:00:00																											192.64	0.03		903.2	27.2845	3.99	0.27	14
2013-02-19	19:00:00																											138.71	0.03		903.4	27.3017	3.97	0.27	14
2013-02-19	23:00:00																											225.69	0.04		904.15	27.3042	3.84	0.26	14
2013-02-20	03:00:00																											217.07	0.11		903.9	27.2979	3.94	0.19	-7
2013-02-20	07:00:00																											230	0.18		904.3	27.3081	3.99	0.16	-7
2013-02-20	11:00:00																											213.91	0.08		904.63	27.2791	3.96	0.18	-7
2013-02-20	15:00:00																											181.98	0.03		903.39	27.2727	4	0.18	-7
2013-02-20	19:00:00																											177.56	0.02		903.11	27.3196	3.98	0.35	-7
2013-02-20	23:00:00																											117.38	0.03		904.17	27.3126	3.85	0.73	-7
2013-02-21	03:00:00																											183.84	0.05		903.98	27.3071	3.87	0.36	-24
2013-02-21	07:00:00																											212.72	0.11		904.06	27.3154	3.93	0.68	-24
2013-02-21	11:00:00																											201.61	0.15		904.77	27.3092	3.84	0.18	-24
2013-02-21	15:00:00																											267.68	0.04		903.66	27.2676	3.94	0.21	-24
2013-02-21	19:00:00																											145.49	0.03		902.89	27.3037	3.89	0.18	-24
2013-02-21	23:00:00																											232.57	0.12		904.12	27.3281	3.82	0.17	-24
2013-02-22	03:00:00																											219.08	0.12		904.13	27.3101	3.84	0.15	-29
2013-02-22	07:00:00																											175.05	0.06		903.84	27.2963	3.87	0.18	-29
2013-02-22	11:00:00																											216.99	0.07		904.8	27.303	3.92	0.22	-29
2013-02-22	15:00:00																											215.16	0.1		903.97	27.2749	3.97	0.9	-29
2013-02-22	19:00:00																											110.8	0.03		902.74	27.2858	4	0.19	-29
2013-02-22	23:00:00																											52.14	0.05		904	27.3179	3.85	0.18	-29
2013-02-23	03:00:00																											194.99	0.12		904.28	27.3212	3.84	0.17	54
2013-02-23	07:00:00																											230.22	0.14		903.57	27.3044	3.89	0.14	54
2013-02-23	11:00:00																											184.67	0.03		904.67	27.317	3.89	0.19	54
2013-02-23	15:00:00																											174.05	0.05		904.28	27.2925	3.92	0.15	54
2013-02-23	19:00:00																											129.51	0.06		902.66	27.3036	4.01	0.17	54
2013-02-23	23:00:00																											148.19	0.04		903.84	27.3136	3.84	0.17	54
2013-02-24	03:00:00																											226.6	0.16		904.49	27.3257	3.81	0.21	-205
2013-02-24	07:00:00																											221.46	0.16		903.42	27.2976	3.89	0.15	-205
2013-02-24	11:00:00																											182.35	0.02		904.47	27.2852	3.93	0.2	-205
2013-02-24	15:00:00																											141.52	0.04		904.62	27.2945	3.87	1.97	-205
2013-02-24	19:00:00																											151.33	0.05		902.72	27.3073	4.02	0.35	-205
2013-02-24	23:00:00																											90.33	0.05		903.64	27.3237	3.86	0.51	-205
2013-02-25	03:00:00																											211.26	0.12		904.7	27.3299	3.81	0.24	86
2013-02-25	07:00:00																											229.48	0.17		903.34	27.3113	3.86	0.28	86
2013-02-25	11:00:00																											28.09	0.04		904.11	27.303	3.88	0.16	86
2013-02-25	15:00:00																											172.13	0.1		904.83	27.3226	3.81	0.15	86
2013-02-25	19:00:00																											133.26	0.06		902.88	27.2883	3.9	0.57	86
2013-02-25	23:00:00																											169.62	0.05		903.41	27.3295	3.83	0.17	86
2013-02-26	03:00:00																											229.17	0.15		904.87	27.3234	3.81	0.16	-109
2013-02-26	07:00:00																											235.54	0.17		903.4	27.3053	3.88	0.14	-109
2013-02-26	11:00:00																											107.05	0.03		903.72	27.3036	3.88	0.15	-109
2013-02-26	15:00:00																											97.9	0.04		904.97	27.2998	3.84	0.17	-109
2013-02-26	19:00:00																											175.06	0.05		903.18	27.294	3.96	0.18	-109
2013-02-26	23:00:00																											72.25	0.04		903.23	27.3312	3.85	0.18	-109
2013-02-27	03:00:00																											213.96	0.09		904.97	27.3403	3.8	0.18	-45
2013-02-27	07:00:00																											226.89	0.08		903.58	27.3192	3.87	0.19	-45
2013-02-27	11:00:00																											154.84	0.05		903.31	27.3133	3.81	0.23	-45
2013-02-27	15:00:00																											170.22	0.03		904.93	27.327	3.81	0.2	-45
2013-02-27	19:00:00																											161.79	0.03		903.55	27.3253	3.78	0.77	-45
2013-02-27	23:00:00																											174.37	0.08		903.1	27.3399	3.79	0.2	-45
2013-02-28	03:00:00																											228.67	0.16		905.01	27.3297	3.74	0.14	-133
2013-02-28	07:00:00																											228.62	0.17		903.9	27.3047	3.86	0.13	-133
2013-02-28	11:00:00																											206.6	0.02		903	27.3027	3.9	0.17	-133
2013-02-28	15:00:00																											192.51	0.08		904.69	27.3321	3.83	0.17	-133
2013-02-28	19:00:00																											213.09	0.03		903.93	27.2994	3.96	0.16	-133
2013-02-28	23:00:00																											102.29	0.03		903.07	27.2987	3.87	0.2	-133
2013-03-01	03:00:00																											157.95	0.08		904.92	27.3305	3.84	0.17	-74
2013-03-01	07:00:00																											229.3	0.17		904.27	27.2993	3.91	0.14	-74
2013-03-01	11:00:00																											117.94	0.04		902.8	27.2927	3.94	0.18	-74
2013-03-01	15:00:00																											132.31	0.03		904.29	27.3343	3.86	0.19	-74
2013-03-01	19:00:00																											182.39	0.06		904.21	27.3315	3.89	0.19	-74
2013-03-01	23:00:00																											227.66	0.03		903.13	27.3109	3.89	0.22	-74
2013-03-02	03:00:00																											229.35	0.13		904.7	27.3362	3.79	0.2	49
2013-03-02	07:00:00																											233.1	0.06		904.64	27.2936	3.94	0.34	49
2013-03-02	11:00:00																											154.04	0.06		902.83	27.2835	3.95	0.21	49
2013-03-02	15:00:00																											219.87	0.09		903.81	27.3131	3.92	0.2	49
2013-03-02	19:00:00																											167.93	0.04		904.39	27.2957	3.9	0.23	49
2013-03-02	23:00:00																											157.52	0.04		903.31	27.2951	3.9	0.29	49
2013-03-03	03:00:00																											185.27	0.05		904.43	27.3096	3.92	0.24	28
2013-03-03	07:00:00																											220.19	0.13		904.9	27.2954	3.89	0.19	28
2013-03-03	11:00:00																											173.23	0.04		903.06	27.2613	3.94	1.13	28
2013-03-03	15:00:00																											109.25	0.04		903.3	27.347	3.84		28
2013-03-03	19:00:00																											227.98	0.17		904.35	27.3545	3.85	0.15	28
2013-03-03	23:00:00																											194.04	0.06		903.59	27.309	3.83	0.39	28
2013-03-04	03:00:00																											183.94	0.03		904.13	27.3202	3.84	0.19	-60
2013-03-04	07:00:00																											239.26	0.17		905.03	27.3285	3.81	0.48	-60
2013-03-04	11:00:00																											194.22	0.07		903.49	27.3072	3.89	1.1	-60
2013-03-04	15:00:00	16	0	1	0	0	0	8	0	0	0	1	0	0	0	0	0	0	0	0	0	0	0	0	0	0	0	118.07	0.04		902.97	27.3132	3.9	0.29	-60
2013-03-04	19:00:00	16	1	0	0	0	0	1	0	0	0	0	1	0	0	0	0	0	0	0	0	0	0	0	0	0	0	162.88	0.06		904.17	27.324	3.8	1.25	-60
2013-03-04	23:00:00	18	2	1	0	0	0	3	0	0	0	0	0	0	0	0	0	0	0	0	0	0	0	0	0	0	0	284.62	0.03		903.92	27.324	3.79	0.39	-60
2013-03-05	03:00:00	14	4	1	0	0	0	3	0	0	0	0	0	0	0	0	0	0	0	0	0	0	0	0	0	0	0	237.84	0.12		903.91	27.3151	3.84	0.24	-64
2013-03-05	07:00:00	14	1	4	0	0	0	6	0	0	0	0	0	0	1	0	2	1	0	0	0	0	0	0	0	0	0	259.85	0.13		904.98	27.3269	3.83	0.41	-64
2013-03-05	11:00:00	7	0	2	0	0	0	1	0	0	0	0	0	0	1	0	0	0	0	0	0	0	0	0	0	0	0	200.78	0.09		904.05	27.2972	3.9	0.28	-64
2013-03-05	15:00:00	11	0	1	0	2	0	5	0	0	0	0	0	0	0	0	4	0	0	0	0	0	0	0	0	0	0	179.21	0.07		902.83	27.2847	3.97	0.5	-64
2013-03-05	19:00:00	14	2	7	0	2	0	1	0	0	0	0	0	0	0	0	0	0	0	0	0	0	0	0	0	0	0	139.11	0.03		903.82	27.309	3.9	0.84	-64
2013-03-05	23:00:00	15	2	2	0	0	0	1	0	0	0	0	0	0	0	0	2	0	0	0	0	0	0	0	0	0	0	95.1	0.04		904.2	27.3268	3.81	0.64	-64
2013-03-06	03:00:00	14	4	0	0	0	0	0	0	0	0	0	0	0	0	0	1	0	0	0	0	0	0	0	0	0	0	225.39	0.16		903.76	27.3342	3.81	0.97	13
2013-03-06	07:00:00	13	3	1	0	1	0	1	0	0	0	0	0	0	0	0	0	0	0	0	0	0	0	0	0	0	0	236.41	0.21		904.66	27.32	3.86	0.82	13
2013-03-06	11:00:00	16	0	0	0	2	0	0	0	0	0	0	0	0	0	0	3	0	0	0	0	0	0	0	0	0	0	190.06	0.04		904.54	27.2819	3.92	0.7	13
2013-03-06	15:00:00	15	0	1	0	0	0	1	0	0	0	0	0	0	0	0	0	0	0	0	0	0	0	0	0	0	0	222.28	0.06		902.9	27.2904	4	0.74	13
2013-03-06	19:00:00	14	0	1	0	0	0	0	0	0	0	0	0	0	0	1	0	0	0	0	0	0	0	0	0	0	0	79.34	0.04		903.36	27.3167	3.89	0.48	13
2013-03-06	23:00:00	15	2	3	0	3	1	1	0	0	0	0	0	0	0	0	0	0	0	0	0	1	0	0	0	0	0	180.06	0.04		904.38	27.3119	3.82	0.59	13
2013-03-07	03:00:00	15	2	1	0	2	2	1	0	0	0	0	0	0	0	0	2	0	0	0	1	0	0	0	0	0	0	225.37	0.15		903.76	27.3113	3.87	0.7	0
2013-03-07	07:00:00	17	1	0	0	1	0	3	0	0	0	0	0	0	0	0	0	0	0	0	1	0	0	0	0	0	0	231.73	0.22		904.24	27.3198	3.92	0.62	0
2013-03-07	11:00:00	8	0	1	0	0	1	0	0	0	0	0	0	0	0	0	4	0	0	0	0	0	0	0	0	0	0	245.49	0.03		904.86	27.2581	3.97	0.25	0
2013-03-07	15:00:00	14	0	0	0	0	0	0	0	0	0	0	0	0	0	0	0	0	0	0	0	0	0	0	0	0	0	218.05	0.07		903.21	27.2666	4	0.74	0
2013-03-07	19:00:00																											284.75	0.1		902.97	27.2989	4.01	0.48	0
2013-03-07	23:00:00	14	3	3	0	1	3	0	0	0	0	0	0	0	0	0	0	0	0	0	1	0	0	0	0	0	0	131.21	0.03		904.48	27.311	3.81	0.52	0
2013-03-08	03:00:00	13	2	6	0	0	2	0	0	0	0	0	0	0	0	1	3	0	0	0	1	0	0	0	0	0	0	227.23	0.18		903.94	27.3262	3.88	0.78	12
2013-03-08	07:00:00	12	1	1	0	0	0	0	0	0	0	0	0	0	0	0	2	0	0	0	1	0	0	0	0	0	0				903.78	27.3205			12
2013-03-08	11:00:00	10	0	1	0	0	0	0	0	0	0	0	1	0	0	0	0	0	0	0	0	0	0	0	0	0	0				904.98	27.2882			12
2013-03-08	15:00:00	14	1	0	1	0	0	0	0	1	0	0	0	0	0	0	1	0	0	0	1	0	0	0	0	0	0				903.69	27.2957			12
2013-03-08	19:00:00																														902.67	27.3088			12
2013-03-08	23:00:00																														904.4	27.3138			12
2013-03-09	03:00:00																														904.23	27.308			1
2013-03-09	07:00:00																														903.38	27.316			1
2013-03-09	11:00:00																														904.84	27.28			1
2013-03-09	15:00:00																														904.21	27.29			1
2013-03-09	19:00:00																														902.56	27.3185			1
2013-03-09	23:00:00																														904.19	27.3065			1
2013-03-10	03:00:00																														904.56	27.3065			2
2013-03-10	07:00:00																														903.13	27.3042			2
2013-03-10	11:00:00																														904.47	27.3128			2
2013-03-10	15:00:00																														904.64	27.2975			2
2013-03-10	19:00:00																														902.66	27.2965			2
2013-03-10	23:00:00																														903.94	27.3221			2
2013-03-11	03:00:00																														904.87	27.3139			-48
2013-03-11	07:00:00																														903.08	27.3002			-48
2013-03-11	11:00:00																														904.02	27.2849			-48
2013-03-11	15:00:00																														904.9	27.3139			-48
2013-03-11	19:00:00																														902.89	27.3018			-48
2013-03-11	23:00:00																														903.64	27.3008			-48
2013-03-12	03:00:00																														905.05	27.3128			-87
2013-03-12	07:00:00																														903.21	27.3062			-87
2013-03-12	11:00:00																														903.51	27.2969			-87
2013-03-12	15:00:00																														904.97	27.2978			-87
2013-03-12	19:00:00																														903.27	27.3001			-87
2013-03-12	23:00:00																														903.43	27.2918			-87
2013-03-13	03:00:00																														905.14	27.3083			-81
2013-03-13	07:00:00																														903.48	27.2843			-81
2013-03-13	11:00:00																											156.95	0.05		903.11	27.2781	3.96	0.24	-81
2013-03-13	15:00:00																											122.61	0.06		904.85	27.2995	3.92	0.2	-81
2013-03-13	19:00:00																											186.17	0.12		903.65	27.2897	4	0.19	-81
2013-03-13	23:00:00																											109.1	0.07		903.3	27.2802	3.93	0.47	-81
2013-03-14	03:00:00																											180.26	0.02		905.09	27.2991	3.91	0.27	-69
2013-03-14	07:00:00																											223.04	0.09		903.84	27.3025	4.04	0.24	-69
2013-03-14	11:00:00																											115.05	0.07		902.86	27.3013	3.98	0.24	-69
2013-03-14	15:00:00																											85.76	0.04		904.59	27.2961	3.9	0.25	-69
2013-03-14	19:00:00																											54.3	0.02		904.01	27.3154	3.98	0.27	-69
2013-03-14	23:00:00																											165.26	0.04		903.29	27.3104	3.89	0.28	-69
2013-03-15	03:00:00																											124.11	0.05		904.93	27.2983	3.97	0.25	-5
2013-03-15	07:00:00																											234.13	0.06		904.18	27.2997	4.03	0.35	-5
2013-03-15	11:00:00																											54.12	0.08		902.8	27.3024	3.92	0.19	-5
2013-03-15	15:00:00																											115.85	0.04		904.23	27.3062	3.86	0.24	-5
2013-03-15	19:00:00																											127.07	0.07		904.25	27.2998	4	0.26	-5
2013-03-15	23:00:00																											121.45	0.05		903.39	27.3074	3.88	0.2	-5
2013-03-16	03:00:00																											226.5	0.12		904.73	27.2987	3.91	0.24	82
2013-03-16	07:00:00																											209.47	0.08		904.46	27.2767	4	0.28	82
2013-03-16	11:00:00																											27.46	0.06		902.89	27.3032	3.93	0.84	82
2013-03-16	15:00:00																											203.4	0.08		903.86	27.3138	3.84	0.33	82
2013-03-16	19:00:00																											257.73	0.06		904.36	27.2916	3.9	0.25	82
2013-03-16	23:00:00																											57.95	0.05		903.55	27.3036	3.87	0.33	82
2013-03-17	03:00:00																											193.03	0.1		904.49	27.3034	3.89	0.26	43
2013-03-17	07:00:00																											126.96	0.07		904.64	27.2732	3.98		43
2013-03-17	11:00:00																											37.37	0.06		903.1	27.304	3.9	0.34	43
2013-03-17	15:00:00																											203.5	0.09		903.52	27.3195	3.84	0.3	43
2013-03-17	19:00:00																											123.68	0.09		904.33	27.2902	3.89	0.22	43
2013-03-17	23:00:00																											49.86	0.03		903.72	27.2908	3.9	0.25	43
2013-03-18	03:00:00																											183.72	0.12		904.27	27.3286	3.9	0.24	16
2013-03-18	07:00:00																											253.38	0.11		904.71	27.2877	3.98	0.84	16
2013-03-18	11:00:00																														903.4	27.2689			16
2013-03-18	15:00:00	16	2	1	0	0	0	7	0	0	0	0	0	0	1	0	0	0	0	0	0	0	0	0	0	0	0				903.28	27.3131			16
2013-03-18	19:00:00	14	4	0	0	3	0	5	0	0	0	0	0	0	0	0	2	0	0	0	0	0	0	0	0	0	0				904.18	27.3112			16
2013-03-18	23:00:00	10	0	1	0	0	0	4	0	0	0	0	0	0	0	0	2	0	0	0	0	0	0	0	1	0	0	200.13	0.05		903.91	27.2782	3.86	0.65	16
2013-03-19	03:00:00	14	2	2	0	4	0	5	0	0	0	0	0	0	0	2	2	0	0	0	0	0	2	0	0	0	0	235.2	0.15		904.07	27.3124	3.92	0.58	-260
2013-03-19	07:00:00	15	3	4	0	7	0	3	0	0	0	0	0	0	0	0	3	0	0	0	0	0	0	0	0	0	0				904.68	27.3009			-260
2013-03-19	11:00:00	15	5	11	0	14	0	6	0	0	0	0	0	0	0	0	4	0	0	0	0	0	0	0	0	0	0	267.12	0.03		903.76	27.2543	3.99	0.25	-260
2013-03-19	15:00:00	14	2	0	0	0	0	0	0	0	0	0	0	0	0	0	1	0	0	0	0	0	0	0	0	0	0	175.49	0.07		903.15	27.3095	3.94	1.17	-260
2013-03-19	19:00:00	14	1	0	0	0	1	1	0	0	0	0	0	0	1	0	3	0	0	0	0	0	0	0	0	0	0	239.33	0.16		904	27.3051	3.91	0.72	-260
2013-03-19	23:00:00	16	0	0	0	0	0	0	0	0	0	1	0	0	1	0	1	0	0	0	0	0	0	0	0	0	0	129.27	0.02		904.11	27.2862	3.98	0.72	-260
2013-03-20	03:00:00	14	0	1	0	4	0	0	0	0	0	0	0	0	0	0	0	0	0	0	0	0	0	0	0	0	0	208.53	0.13		903.96	27.3029	3.93	0.63	27
2013-03-20	07:00:00	10	1	0	0	0	1	0	0	0	0	0	0	0	0	0	0	0	0	0	0	0	0	0	0	0	0	232.11	0.18		904.57	27.2795	3.98	0.78	27
2013-03-20	11:00:00	15	2	0	0	0	0	0	0	0	0	0	0	0	0	0	1	0	0	0	0	0	0	0	0	0	0	192.9	0.05		904.09	27.2369	4.05	0.86	27
2013-03-20	15:00:00	15	1	1	0	0	0	1	0	0	0	0	0	0	0	0	3	0	0	0	0	0	0	0	0	0	0	225.36	0.04		903.14	27.2964	3.96	0.31	27
2013-03-20	19:00:00	14	0	1	0	0	0	0	0	0	0	0	0	0	0	0	2	0	0	0	0	0	1	0	0	0	0	191.64	0.15		903.73	27.3171	3.98	0.31	27
2013-03-20	23:00:00	7	1	1	0	1	0	0	0	0	0	0	0	0	0	0	1	0	0	0	0	0	0	0	0	0	0	148.53	0.06		904.24	27.2918	3.84	0.42	27
2013-03-21	03:00:00	15	1	0	0	0	0	0	0	0	0	1	0	0	1	0	2	0	0	0	0	0	0	0	0	0	0	216.62	0.16		903.86	27.3253	3.87	0.4	55
2013-03-21	07:00:00	15	0	1	0	0	0	0	0	0	0	0	0	0	1	0	1	0	0	0	0	0	0	0	0	0	0	226.83	0.19		904.3	27.3236	3.85	0.33	55
2013-03-21	11:00:00	19	0	0	0	0	0	1	0	0	0	0	0	0	0	0	1	0	0	0	0	0	0	0	0	0	0	163.74	0.05		904.33	27.2751	3.94	0.72	55
2013-03-21	15:00:00	12	0	1	0	0	0	0	0	0	0	0	0	0	0	0	0	0	0	0	0	0	0	0	0	0	0	203.35	0.03		903.2	27.2854	3.89	0.26	55
2013-03-21	19:00:00																											249.02	0.19		903.45	27.3271	3.91	0.72	55
2013-03-21	23:00:00	8	0	0	0	0	0	0	0	0	0	0	0	0	0	0	0	0	0	0	0	0	0	0	0	0	0	195.55	0.07		904.34	27.2803	3.88	0.59	55
2013-03-22	03:00:00	15	1	0	0	0	0	0	0	0	0	0	0	0	0	0	1	0	0	0	0	0	0	0	0	0	0	104.04	0.03		903.88	27.2851	3.93	0.27	19
2013-03-22	07:00:00	15	1	4	0	0	3	0	0	0	0	0	0	0	0	0	0	0	0	0	0	0	0	0	0	0	0	234.08	0.25		904.04	27.3242	3.86	0.28	19
2013-03-22	11:00:00	15	0	8	0	0	0	2	0	0	0	0	0	0	0	0	0	1	0	0	0	0	0	0	0	0	0	238.64	0.11		904.54	27.2737	3.95	0.29	19
2013-03-22	15:00:00	10	0	0	0	0	0	0	0	0	0	0	0	0	0	0	3	0	0	0	0	0	0	0	0	0	0	123.57	0.04		903.42	27.2739	3.98	0.16	19
2013-03-22	19:00:00																											243.83	0.09		903.22	27.3318	3.84	0.16	19
2013-03-22	23:00:00																											239.71	0.07		904.41	27.32	3.87	0.17	19
2013-03-23	03:00:00																											226.72	0.05		903.97	27.3068	3.82	0.2	-38
2013-03-23	07:00:00																											231.5	0.17		903.75	27.3336	3.87	0.14	-38
2013-03-23	11:00:00																											194.2	0.07		904.65	27.3138	3.89	0.22	-38
2013-03-23	15:00:00																											188.53	0.04		903.69	27.3122	3.84	0.4	-38
2013-03-23	19:00:00																											232.53	0.07		903.02	27.3188	3.85	0.39	-38
2013-03-23	23:00:00																											181.35	0.06		904.4	27.3167	3.78	0.24	-38
2013-03-24	03:00:00																											233.65	0.05		904.12	27.3167	3.82	0.37	-78
2013-03-24	07:00:00																											234.34	0.18		903.45	27.3123	3.82	0.15	-78
2013-03-24	11:00:00																											228.91	0.14		904.61	27.3116	3.87	0.13	-78
2013-03-24	15:00:00																											201.55	0.04		904.02	27.2822	3.89	0.24	-78
2013-03-24	19:00:00																											260.96	0.04		902.88	27.3197	3.87	0.33	-78
2013-03-24	23:00:00																											203.28	0.05		904.34	27.3183	3.79	0.43	-78
2013-03-25	03:00:00																											214.8	0.07		904.35	27.3212	3.91	0.2	-32
2013-03-25	07:00:00																											233.44	0.07		903.16	27.3092	3.85	0.2	-32
2013-03-25	11:00:00																											208.54	0.06		904.42	27.3062	3.89	0.22	-32
2013-03-25	15:00:00																											200.7	0.05		904.4	27.3182	3.92	0.38	-32
2013-03-25	19:00:00																											100.55	0.02		902.88	27.3188	3.92	0.29	-32
2013-03-25	23:00:00																											170.1	0.06		904.2	27.3307	3.76	0.25	-32
2013-03-26	03:00:00																											191.8	0.04		904.63	27.32	3.85	0.24	0
2013-03-26	07:00:00																											228.12	0.06		902.99	27.3194	3.86	0.22	0
2013-03-26	11:00:00																											241.17	0.05		904.07	27.3198	3.86	0.25	0
2013-03-26	15:00:00																											189.64	0.04		904.69	27.3119	3.84	0.77	0
2013-03-26	19:00:00																											88.16	0.03		902.98	27.3207	3.91	2.05	0
2013-03-26	23:00:00																											164.5	0.09		904.01	27.3436	3.77	0.73	0
2013-03-27	03:00:00																											239.04	0.15		904.92	27.3255	3.8	0.21	2
2013-03-27	07:00:00																											196.65	0.04		902.98	27.2987	3.82	0.96	2
2013-03-27	11:00:00																											134.02	0.06		903.63	27.3395	3.78	0.34	2
2013-03-27	15:00:00																											229.78	0.12		904.89	27.3233	3.83	0.56	2
2013-03-27	19:00:00																											120.43	0.02		903.23	27.3058	3.87	0.22	2
2013-03-27	23:00:00																											190.59	0.07		903.81	27.3361	3.76	0.26	2
2013-03-28	03:00:00																											226.8	0.15		905.17	27.3307	3.82	0.12	8
2013-03-28	07:00:00																											162.72	0.07		903.13	27.3194	3.89	0.62	8
2013-03-28	11:00:00																											131.82	0.03		903.13	27.3228	3.8	0.36	8
2013-03-28	15:00:00																											222.4	0.09		904.89	27.3102	3.84	0.18	8
2013-03-28	19:00:00																											244.1	0.04		903.57	27.3184	3.88	0.44	8
2013-03-28	23:00:00																											147.97	0.08		903.6	27.3495	3.75	0.23	8
2013-03-29	03:00:00																											232.48	0.23		905.28	27.3371	3.79	0.12	17
2013-03-29	07:00:00																											276.45	0.13		903.49	27.2921	3.96	0.17	17
2013-03-29	11:00:00																											212.02	0.07		902.72	27.3139	3.84	0.22	17
2013-03-29	15:00:00																											195.78	0.11		904.68	27.3398	3.79	0.2	17
2013-03-29	19:00:00																											189.67	0.1		903.94	27.3093	3.92	0.41	17
2013-03-29	23:00:00																											140.69	0.05		903.47	27.3394	3.72	0.26	17
2013-03-30	03:00:00																											234.43	0.22		905.24	27.3336	3.79	0.16	20
2013-03-30	07:00:00																											237.68	0.08		903.96	27.2742	4.02	0.16	20
2013-03-30	11:00:00																											203.86	0.07		902.48	27.3061	3.91	0.28	20
2013-03-30	15:00:00																											198.13	0.14		904.31	27.3406	3.79	0.24	20
2013-03-30	19:00:00																											234.06	0.1		904.28	27.3018	3.92	0.17	20
2013-03-30	23:00:00																											80.19	0.05		903.43	27.3295	3.81	0.31	20
2013-03-31	03:00:00																											228.41	0.21		905.04	27.3387	3.74	0.18	4
2013-03-31	07:00:00																											217.39	0.13		904.46	27.2789	3.99	0.14	4
2013-03-31	11:00:00																											176.28	0.06		902.52	27.293	3.97	0.2	4
2013-03-31	15:00:00																											217.13	0.12		903.84	27.33	3.83	0.29	4
2013-03-31	19:00:00																											230.54	0.15		904.49	27.3057	3.84	0.2	4
2013-03-31	23:00:00																											183.02	0.05		903.52	27.3089	3.83	0.26	4
2013-04-01	03:00:00																											234.25	0.17		904.69	27.3354	3.82	0.19	4
2013-04-01	07:00:00																											256.79	0.12		904.82	27.2986	4.05	0.79	4
2013-04-01	11:00:00																											151.85	0.04		902.8	27.2727	3.93	0.97	4
2013-04-01	15:00:00	12	0	0	0	0	0	1	0	0	0	0	0	0	0	0	0	0	0	0	0	0	0	0	0	0	0	192.83	0.08		903.35	27.3218	3.9	0.45	4
2013-04-01	19:00:00	12	2	1	0	2	0	2	0	0	0	0	0	0	1	0	1	0	0	0	0	0	0	0	0	0	0	219.67	0.13		904.52	27.303	3.89	0.55	4
2013-04-01	23:00:00	13	0	0	0	0	0	1	0	0	0	0	0	0	3	0	1	0	0	0	0	0	0	0	0	0	0	147.92	0.03		903.72	27.3016	3.83	0.47	4
2013-04-02	03:00:00	11	0	2	0	3	0	2	0	0	0	0	0	0	1	0	0	1	0	0	0	0	0	0	0	0	0	227.66	0.14		904.27	27.326	3.88	0.88	1
2013-04-02	07:00:00	13	0	0	0	0	0	2	0	0	0	0	0	0	1	0	0	0	0	0	0	0	0	0	0	0	0	221.39	0.16		904.95	27.286	3.98	0.67	1
2013-04-02	11:00:00	12	0	2	0	2	0	1	0	0	0	0	0	0	1	0	5	0	0	0	0	0	0	0	0	0	0	189.23	0.05		903.24	27.2756	4	0.42	1
2013-04-02	15:00:00	14	2	1	0	0	0	2	0	0	0	0	0	0	0	0	1	0	0	0	0	0	0	0	0	0	0	98.8	0.03		902.94	27.3104	3.92	0.67	1
2013-04-02	19:00:00	14	2	1	0	0	0	5	0	0	0	0	0	0	0	0	0	1	0	0	0	0	0	0	0	0	0	236.3	0.18		904.35	27.3009	3.84	1.22	1
2013-04-02	23:00:00	13	4	1	0	0	0	0	0	0	0	0	0	0	0	0	1	0	0	0	0	0	1	0	0	0	0	183.85	0.04		904.02	27.2827	3.94	1	1
2013-04-03	03:00:00	8	1	0	1	1	0	0	0	0	0	0	0	0	0	0	0	0	0	0	0	0	0	0	0	0	0	230.23	0.13		903.92	27.2958	3.95	1.22	0
2013-04-03	07:00:00	14	1	2	0	1	1	1	0	0	0	0	0	0	1	1	2	0	0	0	0	0	0	0	0	0	0	227.13	0.14		904.86	27.2733	4.02	0.75	0
2013-04-03	11:00:00	20	0	4	0	0	0	1	0	0	0	0	0	0	0	0	9	0	0	0	0	0	1	0	0	0	0	109.87	0.06		903.79	27.278	4.01	0.76	0
2013-04-03	15:00:00	16	1	3	0	0	0	0	0	0	0	0	0	0	0	0	1	0	0	0	0	0	0	0	0	0	0	264.39	0.09		902.79	27.2997	3.93	1.62	0
2013-04-03	19:00:00	16	2	1	0	3	0	0	0	0	0	0	0	0	0	1	0	0	0	0	0	0	0	0	0	0	0	250.18	0.16		904.05	27.3064	3.86	0.57	0
2013-04-03	23:00:00																											157.17	0.04		904.32	27.284	3.9	0.75	0
2013-04-04	03:00:00	7	2	0	0	0	0	0	0	0	0	0	0	0	0	0	3	0	0	0	0	0	0	0	0	0	0	224.3	0.11		903.71	27.3026	3.92	0.74	-31
2013-04-04	07:00:00	18	0	0	0	0	0	0	0	0	0	0	0	0	0	0	0	1	0	0	0	0	1	0	0	0	0	229.43	0.19		904.55	27.2993	3.91	0.48	-31
2013-04-04	11:00:00	8	0	1	1	2	0	0	0	0	0	0	0	0	0	0	0	0	0	0	0	0	0	0	0	0	0	85.47	0.05		904.31	27.2687	4	0.87	-31
2013-04-04	15:00:00	16	0	0	1	0	0	0	0	0	0	0	0	0	0	0	1	0	0	0	0	0	0	0	0	0	0	112.06	0.05		902.89	27.2932	3.94	0.83	-31
2013-04-04	19:00:00	17	1	2	0	0	0	1	0	0	0	0	0	0	0	0	1	2	0	0	1	0	0	0	0	0	0	236.95	0.21		903.69	27.3006	3.87	1.16	-31
2013-04-04	23:00:00	14	0	1	0	0	0	0	0	0	0	0	0	0	0	0	2	0	0	0	0	0	0	0	0	0	0	205.98	0.04		904.59	27.2737	3.97	0.5	-31
2013-04-05	03:00:00	18	0	2	0	2	0	1	0	0	0	0	0	0	0	0	3	0	0	0	0	0	2	0	0	0	0	225.63	0.1		903.69	27.2857	3.96	0.22	-92
2013-04-05	07:00:00																											231.84	0.2		904.12	27.2805	3.98	0.85	-92
2013-04-05	11:00:00																											208.75	0.07		904.66	27.2497	4.07	0.26	-92
2013-04-05	15:00:00	9	1	0	0	0	0	1	0	0	0	0	0	0	0	0	0	0	0	0	0	0	0	0	0	1	0	201.99	0.06		903.16	27.2779	3.95	0.25	-92
2013-04-05	19:00:00																											235.99	0.07		903.33	27.2961	3.99	0.26	-92
2013-04-05	23:00:00																											176.34	0.04		904.73	27.2924	3.96	0.31	-92
2013-04-06	03:00:00																											227.72	0.13		903.82	27.2873	4.01	0.23	-36
2013-04-06	07:00:00																											160.44	0.05		903.64	27.281	4.04	0.28	-36
2013-04-06	11:00:00																											189.04	0.06		904.78	27.26	4.07	0.35	-36
2013-04-06	15:00:00																											227.47	0.08		903.59	27.2771	4.08	0.34	-36
2013-04-06	19:00:00																											114	0.02		903.08	27.288	4.04	0.44	-36
2013-04-06	23:00:00																											208.78	0.04		904.73	27.2718	4.01	0.38	-36
2013-04-07	03:00:00																											229.61	0.06		904.07	27.2844	4.08	0.34	75
2013-04-07	07:00:00																											257.37	0.08		903.19	27.2832	4	0.34	75
2013-04-07	11:00:00																											162.83	0.04		904.62	27.2696	3.97	0.43	75
2013-04-07	15:00:00																											199.21	0.02		904.03	27.2953	4.03	0.42	75
2013-04-07	19:00:00																											174.45	0.09		902.95	27.3063	3.9	0.31	75
2013-04-07	23:00:00																											232.57	0.13		904.61	27.2858	3.93	0.23	75
2013-04-08	03:00:00																											260.17	0.11		904.39	27.2868	4.02	0.26	13
2013-04-08	07:00:00																											55.4	0.04		902.91	27.2871	3.93	0.37	13
2013-04-08	11:00:00																											210.84	0.09		904.3	27.2922	3.87	0.28	13
2013-04-08	15:00:00																											258.69	0.14		904.44	27.2865	3.99	0.22	13
2013-04-08	19:00:00																											80.49	0.04		903	27.2915	3.95	0.41	13
2013-04-08	23:00:00																											137.21	0.05		904.42	27.2876	3.89	0.3	13
2013-04-09	03:00:00																											216.03	0.05		904.73	27.2871	4.04	0.3	-80
2013-04-09	07:00:00																											186.09	0.06		902.83	27.2881	3.94	0.4	-80
2013-04-09	11:00:00																											245.42	0.04		903.88	27.2757	3.92	0.4	-80
2013-04-09	15:00:00																											225.72	0.14		904.69	27.2963	3.99	0.19	-80
2013-04-09	19:00:00																											180.02	0.06		903.16	27.293	3.93	0.67	-80
2013-04-09	23:00:00																											142.64	0.09		904.2	27.2785	3.95	0.22	-80
2013-04-10	03:00:00																											246.31	0.16		904.97	27.2899	3.96	0.31	66
2013-04-10	07:00:00																											157.92	0.04		902.9	27.2865	3.96	0.56	66
2013-04-10	11:00:00																											220.7	0.05		903.44	27.2907	3.91	0.23	66
2013-04-10	15:00:00																											233.25	0.19		904.8	27.2969	3.92	0.19	66
2013-04-10	19:00:00																											159.51	0.06		903.42	27.294	3.93	1.34	66
2013-04-10	23:00:00																											182.84	0.05		903.97	27.2888	3.9	0.22	66
2013-04-11	03:00:00																											229.38	0.22		905.11	27.3051	3.94	0.71	22
2013-04-11	07:00:00																											124.63	0.1		903.14	27.2742	3.99	0.58	22
2013-04-11	11:00:00																											76.67	0.05		903.08	27.2738	3.95	0.24	22
2013-04-11	15:00:00																											233.04	0.15		904.74	27.3238	3.9	0.29	22
2013-04-11	19:00:00																											189.14	0.08		903.7	27.2958	3.93	0.19	22
2013-04-11	23:00:00																											221.77	0.05		903.78	27.3079	3.86	0.24	22
2013-04-12	03:00:00																											216.87	0.07		905.12	27.2896	3.94	0.2	8
2013-04-12	07:00:00																											231.99	0.06		903.43	27.3207	3.85	0.72	8
2013-04-12	11:00:00																											102.82	0.03		902.8	27.2865	3.86	0.51	8
2013-04-12	15:00:00																											208.41	0.1		904.55	27.322	3.88	0.29	8
2013-04-12	19:00:00																											161.26	0.04		903.96	27.3313	3.84	0.31	8
2013-04-12	23:00:00																											110.42	0.04		903.66	27.3282	3.75	0.35	8
2013-04-13	03:00:00																											222.37	0.14		905.03	27.3221	3.78	0.3	54
2013-04-13	07:00:00																											224.73	0.1		903.75	27.3053	3.88	0.35	54
2013-04-13	11:00:00																											64.77	0.04		902.66	27.3031	3.82	0.41	54
2013-04-13	15:00:00																											201.33	0.05		904.27	27.334	3.79	0.41	54
2013-04-13	19:00:00																											164.08	0.05		904.18	27.3325	3.85	0.43	54
2013-04-13	23:00:00																											91.37	0.04		903.64	27.3331	3.75	0.43	54
2013-04-14	03:00:00																											196.72	0.08		904.89	27.3312	3.76	0.42	24
2013-04-14	07:00:00																											232.33	0.19		904.09	27.3341	3.81	0.34	24
2013-04-14	11:00:00																											159.55	0.04		902.68	27.2908	3.85	0.46	24
2013-04-14	15:00:00																											111.36	0.03		903.98	27.318	3.8	0.54	24
2013-04-14	19:00:00																											150.91	0.05		904.34	27.3369	3.81	0.45	24
2013-04-14	23:00:00																											117.96	0.04		903.68	27.3443	3.71	0.54	24
2013-04-15	03:00:00																											225.85	0.14		904.68	27.3383	3.73	0.52	27
2013-04-15	07:00:00																											233.63	0.24		904.35	27.3324	3.78	0.53	27
2013-04-15	11:00:00																											239.38	0.07		902.83	27.3058	3.86	1.16	27
2013-04-15	15:00:00	14	0	0	0	0	0	11	0	0	0	0	0	0	0	0	4	0	0	0	2	0	0	0	0	0	0	183.3	0.04		903.66	27.3343	3.76	1.7	27
2013-04-15	19:00:00	11	0	3	1	0	0	5	0	0	0	0	0	0	1	0	1	0	0	0	1	1	3	0	0	0	0	249.41	0.08		904.38	27.342	3.84	0.93	27
2013-04-15	23:00:00	15	2	0	0	1	0	6	0	0	0	0	0	0	0	0	5	0	0	0	0	0	0	0	0	0	0	71.2	0.05		903.78	27.3386	3.72	0.75	27
2013-04-16	03:00:00	17	1	1	1	4	0	3	0	0	0	0	0	0	0	0	0	0	0	0	0	0	0	0	1	0	0	223.77	0.14		904.43	27.3576	3.72	0.72	13
2013-04-16	07:00:00	15	3	3	0	0	0	6	0	0	0	0	0	0	0	0	0	0	0	0	0	0	0	0	0	0	0	236.69	0.27		904.52	27.3437	3.7	0.65	13
2013-04-16	11:00:00	15	2	1	0	3	0	4	0	0	0	0	0	0	0	0	0	0	0	1	0	0	1	0	0	0	0	290.82	0.12		903.1	27.2974	3.82	0.43	13
2013-04-16	15:00:00	16	0	0	0	3	0	1	0	0	0	0	0	0	0	0	9	0	0	0	0	1	1	0	0	0	0	259.28	0.03		903.43	27.3068	3.83	0.37	13
2013-04-16	19:00:00	13	1	2	1	1	0	5	0	0	0	0	0	0	0	0	2	0	0	0	1	0	0	0	0	0	0	161.3	0.05		904.37	27.3398	3.83	0.33	13
2013-04-16	23:00:00																											135.51	0.02		903.93	27.3322	3.75	0.34	13
2013-04-17	03:00:00																											232.05	0.1		904.2	27.3443	3.75	0.27	7
2013-04-17	07:00:00																											229.81	0.28		904.57	27.3352	3.8	0.16	7
2013-04-17	11:00:00																											144.57	0.09		903.39	27.285	3.91	0.78	7
2013-04-17	15:00:00																											25.63	0.04		903.22	27.302	3.87	0.25	7
2013-04-17	19:00:00																											153.52	0.07		904.25	27.3483	3.83	0.25	7
2013-04-17	23:00:00																											224.81	0.11		904.08	27.3351	3.75	0.22	7
2013-04-18	03:00:00																											196.83	0.07		903.99	27.3286	3.77	0.25	-38
2013-04-18	07:00:00																											235.97	0.23		904.52	27.3269	3.77	0.15	-38
2013-04-18	11:00:00																											237.4	0.1		903.72	27.2865	3.94	0.28	-38
2013-04-18	15:00:00																											110.11	0.05		903.12	27.3083	3.87	0.3	-38
2013-04-18	19:00:00																											182.96	0.09		904.1	27.3341	3.8	0.19	-38
2013-04-18	23:00:00																											286.23	0.02		904.28	27.3325	3.84	1.85	-38
2013-04-19	03:00:00																											218.97	0.06		903.82	27.326	3.78	0.39	61
2013-04-19	07:00:00																											235.56	0.2		904.35	27.3285	3.81	0.14	61
2013-04-19	11:00:00																											246.49	0.07		904.04	27.2943	3.91	0.21	61
2013-04-19	15:00:00																											101.28	0.04		903.12	27.309	3.86	0.22	61
2013-04-19	19:00:00																											184.63	0.1		903.89	27.3358	3.77	0.2	61
2013-04-19	23:00:00																											249.15	0.09		904.45	27.3307	3.85	0.18	61
2013-04-20	03:00:00																											229.73	0.06		903.75	27.3202	3.81	0.22	44
2013-04-20	07:00:00																											224.61	0.11		904.09	27.3135	3.81	0.17	44
2013-04-20	11:00:00																											256.44	0.07		904.33	27.2976	3.89	0.19	44
2013-04-20	15:00:00																											91.51	0.05		903.26	27.3134	3.83	0.24	44
2013-04-20	19:00:00																											214.83	0.06		903.68	27.335	3.79	0.29	44
2013-04-20	23:00:00																											231.45	0.11		904.63	27.3232	3.85	0.17	44
2013-04-21	03:00:00																											160.96	0.05		903.75	27.3123	3.85	0.23	21
2013-04-21	07:00:00																											219.75	0.09		903.76	27.325	3.82	0.22	21
2013-04-21	11:00:00																											229.95	0.1		904.51	27.3034	3.89	0.18	21
2013-04-21	15:00:00																											212.33	0.03		903.5	27.2956	3.87	0.28	21
2013-04-21	19:00:00																											132.97	0.02		903.47	27.3276	3.8	0.3	21
2013-04-21	23:00:00																											240.03	0.15		904.75	27.3366	3.79	0.17	21
2013-04-22	03:00:00																											240.79	0.16		903.87	27.3226	3.83	0.49	20
2013-04-22	07:00:00																											192.94	0.02		903.36	27.2975	3.85	0.25	20
2013-04-22	11:00:00																											245.91	0.06		904.53	27.3095	3.83	0.22	20
2013-04-22	15:00:00																											254.55	0.07		903.8	27.3061	3.88	0.19	20
2013-04-22	19:00:00																											90.77	0.04		903.28	27.3217	3.82	0.23	20
2013-04-22	23:00:00																											227.11	0.1		904.79	27.3204	3.82	0.2	20
2013-04-23	03:00:00																											236.91	0.13		904.1	27.321	3.86	0.16	32
2013-04-23	07:00:00																											203.27	0.04		902.98	27.2975	3.84	0.22	32
2013-04-23	11:00:00																											196.59	0.04		904.39	27.3015	3.86	0.23	32
2013-04-23	15:00:00																											115.48	0.04		904.19	27.3071	3.89	0.31	32
2013-04-23	19:00:00																											190.37	0.03		903.2	27.324	3.81	0.26	32
2013-04-23	23:00:00																											210.26	0.08		904.77	27.3253	3.8	0.24	32
2013-04-24	03:00:00																											239.08	0.2		904.45	27.3255	3.84	0.23	34
2013-04-24	07:00:00																											158.33	0.05		902.7	27.3003	3.86	0.26	34
2013-04-24	11:00:00																											190.05	0.08		904.06	27.3073	3.82	0.2	34
2013-04-24	15:00:00																											230.55	0.11		904.54	27.303	3.94	0.16	34
2013-04-24	19:00:00																											110.97	0.04		903.2	27.3223	3.83	0.2	34
2013-04-24	23:00:00																											194.87	0.07		904.62	27.3246	3.76	0.19	34
2013-04-25	03:00:00																											241.04	0.23		904.84	27.3342	3.81	0.14	34
2013-04-25	07:00:00																											210.38	0.08		902.6	27.3133	3.81	0.17	34
2013-04-25	11:00:00																											265.68	0.04		903.59	27.3136	3.77	0.18	34
2013-04-25	15:00:00																											213.86	0.08		904.79	27.304	3.92	0.16	34
2013-04-25	19:00:00																											102.39	0.02		903.36	27.3236	3.84	0.21	34
2013-04-25	23:00:00																											154.7	0.02		904.38	27.3103	3.78	0.29	34
2013-04-26	03:00:00																											237.46	0.17		905.2	27.3163	3.86	0.13	10
2013-04-26	07:00:00																											236.68	0.12		902.75	27.3209	3.87	0.15	10
2013-04-26	11:00:00																											258.11	0.03		903.06	27.2933	3.83	0.37	10
2013-04-26	15:00:00																											232.69	0.12		904.87	27.3055	3.86	0.17	10
2013-04-26	19:00:00																											125.11	0.12		903.64	27.3127	3.89	0.17	10
2013-04-26	23:00:00																											155.81	0.03		904.09	27.3071	3.8	0.21	10
2013-04-27	03:00:00																											236.38	0.22		905.44	27.3317	3.78	0.16	3
2013-04-27	07:00:00																											236.66	0.24		903.14	27.3239	3.84	0.14	3
2013-04-27	11:00:00																											179.88	0.04		902.58	27.2768	3.89	0.21	3
2013-04-27	15:00:00																											270.28	0.04		904.71	27.3113	3.88	0.22	3
2013-04-27	19:00:00																											178.32	0.14		903.98	27.3209	3.84	0.17	3
2013-04-27	23:00:00																											261.15	0.03		903.79	27.3024	3.79	0.21	3
2013-04-28	03:00:00																											228.66	0.21		905.43	27.3198	3.8	0.15	25
2013-04-28	07:00:00																											234.72	0.23		903.68	27.3095	3.9	0.16	25
2013-04-28	11:00:00																											308.7	0.07		902.3	27.2666	3.96	0.23	25
2013-04-28	15:00:00																											202.95	0.11		904.36	27.3028	3.87	0.22	25
2013-04-28	19:00:00																											235.92	0.18		904.32	27.3179	3.92	0.16	25
2013-04-28	23:00:00																											196.55	0.03		903.62	27.2945	3.92	0.23	25
2013-04-29	03:00:00																											195.3	0.16		905.22	27.2968	3.9	0.19	96
2013-04-29	07:00:00																											237.9	0.23		904.25	27.2934	4.03	0.14	96
2013-04-29	11:00:00																											297.34	0.08		902.28	27.2369	4.05	0.24	96
2013-04-29	15:00:00																											191.82	0.07		903.89	27.2919	3.95	0.25	96
2013-04-29	19:00:00																											238.42	0.24		904.58	27.3238	3.89	0.19	96
2013-04-29	23:00:00																											211.73	0.06		903.59	27.2929	3.91	0.22	96
2013-04-30	03:00:00																											230.75	0.15		904.78	27.2953	3.91	0.2	34
2013-04-30	07:00:00																											241.58	0.14		904.68	27.2564	4.01	0.7	34
2013-04-30	11:00:00																											265.48	0.08		902.56	27.2611	3.97	1.17	34
2013-04-30	15:00:00	15	5	2	0	1	0	1	0	0	0	0	0	0	0	0	3	0	0	0	0	0	5	0	0	0	0	174.1	0.09		903.4	27.3059	3.88	0.3	34
2013-04-30	19:00:00	12	1	0	0	1	0	8	0	0	0	0	0	0	0	0	0	0	0	0	0	0	1	0	0	0	0	238.3	0.22		904.67	27.3108	3.88	0.7	34
2013-04-30	23:00:00																											206.27	0.08		903.73	27.3079	3.83	1.1	34
2013-05-01	03:00:00	15	0	0	0	0	0	4	0	0	0	1	0	0	0	0	2	0	0	0	0	0	0	0	0	0	0	153.94	0.1		904.27	27.303	3.83	0.47	6
2013-05-01	07:00:00	13	0	2	0	1	0	7	0	0	0	0	0	0	2	0	4	0	0	1	0	0	2	0	0	0	0	232.49	0.18		904.85	27.2925	3.94	0.89	6
2013-05-01	11:00:00	14	2	1	0	0	0	1	0	0	0	0	0	0	2	0	1	0	0	0	0	1	2	0	0	0	0	158.7	0.06		903.03	27.2828	3.95	0.47	6
2013-05-01	15:00:00	16	1	0	0	1	0	2	0	0	0	0	0	0	0	1	0	0	0	0	0	0	12	0	0	0	0	158.21	0.06		903.06	27.2879	3.83	0.87	6
2013-05-01	19:00:00	14	0	4	0	2	0	0	0	0	0	0	0	0	0	0	0	0	0	0	0	0	7	0	0	0	0	237.99	0.17		904.62	27.3048	3.91	0.53	6
2013-05-01	23:00:00	13	0	3	0	0	0	0	0	0	0	0	0	0	0	0	4	0	0	0	0	0	3	0	0	0	0	172.08	0.04		904.04	27.3127	3.85	0.8	6
2013-05-02	03:00:00	14	0	1	0	0	0	0	0	0	0	0	0	0	0	0	1	0	0	0	0	0	2	0	0	0	0	225.56	0.07		903.84	27.3109	3.8	0.51	39
2013-05-02	07:00:00	14	0	1	0	0	0	0	0	0	0	0	0	0	0	0	5	1	0	0	0	0	0	0	0	0	0	233.31	0.15		904.77	27.2944	3.86	0.69	39
2013-05-02	11:00:00	16	1	3	0	1	0	3	0	0	0	0	0	0	1	0	2	0	0	0	0	0	2	0	0	0	0	186.42	0.12		903.6	27.2926	3.92	1.82	39
2013-05-02	15:00:00	12	0	1	0	1	0	2	0	0	0	0	0	0	1	0	1	0	0	0	0	0	6	0	0	0	0	150.37	0.02		902.89	27.2834	3.9	0.74	39
2013-05-02	19:00:00	12	0	0	0	0	0	0	0	0	0	0	0	0	0	0	0	0	0	0	0	0	8	0	0	0	0	200.83	0.06				3.96	0.49	39
2013-05-02	23:00:00	14	1	1	0	0	0	3	0	0	0	0	0	0	0	0	0	0	0	0	0	0	2	0	0	0	0	102.91	0.03				3.89	0.77	39
2013-05-03	03:00:00	14	4	2	0	0	0	1	0	0	0	0	0	0	0	0	1	1	0	1	0	1	5	0	0	0	0	162.07	0.05				3.87	0.87	60
2013-05-03	07:00:00	19	0	2	0	0	0	7	0	0	0	0	0	0	0	0	3	0	0	1	0	1	3	0	0	0	0	222.94	0.22				3.87	0.47	60
2013-05-03	11:00:00	14	1	0	0	0	0	1	0	0	0	0	0	0	0	0	1	0	0	0	0	0	1	0	0	0	0	203.99	0.08				3.97	0.78	60
2013-05-03	15:00:00	15	1	0	0	0	0	1	0	0	0	0	0	0	2	0	1	0	0	0	0	0	0	0	0	0	0	182.79	0.03				3.9	1.34	60
2013-05-03	19:00:00	15	1	1	0	0	0	0	0	0	0	0	0	0	0	0	2	0	0	0	0	0	5	0	0	0	0	211.92	0.03				3.92	0.74	60
2013-05-03	23:00:00	15	3	1	0	0	0	2	0	0	0	0	0	0	0	0	2	0	0	0	0	0	1	0	0	0	0	124.48	0.05				3.97	1.18	60
2013-05-04	03:00:00	16	2	1	0	0	0	3	0	0	0	0	0	0	0	0	0	0	0	0	0	0	0	0	0	0	0	127.44	0.03				3.89	0.99	24
2013-05-04	07:00:00	19	0	1	0	0	0	2	0	0	0	0	0	0	0	0	0	0	0	0	0	0	6	0	0	0	0	194.37	0.12				3.81	0.97	24
2013-05-04	11:00:00	12	1	0	0	0	0	4	0	0	0	0	0	0	1	0	3	0	0	0	0	0	2	0	0	0	0	239.1	0.11				3.94	1.11	24
2013-05-04	15:00:00	12	0	1	0	0	0	1	0	0	0	0	0	0	0	0	7	0	0	0	0	0	2	0	0	0	0	125.99	0.04				3.91	0.47	24
2013-05-04	19:00:00	14	0	0	0	0	0	3	0	0	0	0	0	0	0	0	4	0	0	0	0	0	8	0	0	0	0	158.58	0.05				3.8	0.79	24
2013-05-04	23:00:00	16	2	0	0	1	0	5	0	0	0	0	0	0	0	0	3	0	0	0	0	1	6	0	0	0	0	196.24	0.04				3.9	0.4	24
2013-05-05	03:00:00	13	0	2	0	0	0	3	0	0	0	0	0	0	0	0	0	0	0	1	0	0	0	0	0	0	0	91.53	0.03				3.88	1.03	7
2013-05-05	07:00:00	13	0	1	0	0	0	4	0	0	0	0	0	0	0	0	0	1	0	0	0	0	1	0	0	0	0	225.76	0.13				3.81	0.32	7
2013-05-05	11:00:00	14	1	1	0	0	0	1	0	0	0	0	0	0	0	0	0	0	0	0	0	0	2	1	0	0	0	217.92	0.12				3.89	0.31	7
2013-05-05	15:00:00																											138.84	0.05				3.9	0.27	7
2013-05-05	19:00:00																											196.38	0.03				3.84	0.31	7
2013-05-05	23:00:00																											201.39	0.07				3.88	0.31	7
2013-05-06	03:00:00																											210.21	0.06				3.95	0.3	13
2013-05-06	07:00:00																											229.98	0.13				3.88	0.23	13
2013-05-06	11:00:00																											201.17	0.08				4	0.25	13
2013-05-06	15:00:00																											138.77	0.04				3.98	0.31	13
2013-05-06	19:00:00																											161.69	0.05				3.89	0.32	13
2013-05-06	23:00:00																											228.07	0.11				3.95	0.29	13
2013-05-07	03:00:00																											234.95	0.07				4.04	0.33	9
2013-05-07	07:00:00																											187.94	0.05				3.98	0.36	9
2013-05-07	11:00:00																											209.02	0.07				4.06	0.3	9
2013-05-07	15:00:00																											260.32	0.03				4.06	0.39	9
2013-05-07	19:00:00																											181.36	0.04				4	0.39	9
2013-05-07	23:00:00																											213.37	0.11				4.04	0.27	9
2013-05-08	03:00:00																											227.21	0.2				4.08	0.19	14
2013-05-08	07:00:00																											178.81	0.09				4.14	0.25	14
2013-05-08	11:00:00																											126.59	0.05				4.01	0.29	14
2013-05-08	15:00:00																											212.95	0.12				4.05	0.24	14
2013-05-08	19:00:00																											273.27	0.09				4.06	0.26	14
2013-05-08	23:00:00																											205.08	0.04				4.05	0.29	14
2013-05-09	03:00:00																											227.05	0.1				4.14	0.25	38
2013-05-09	07:00:00																											235.66	0.05				4.05	0.31	38
2013-05-09	11:00:00																											250.65	0.01				4.06	0.34	38
2013-05-09	15:00:00																											235.45	0.08				4.01	0.3	38
2013-05-09	19:00:00																											166.7	0.06				3.96	0.3	38
2013-05-09	23:00:00																											224.12	0.07				3.98	0.3	38
2013-05-10	03:00:00																											231.29	0.14				4.02	0.25	9
2013-05-10	07:00:00																											218.94	0.04				3.98	0.36	9
2013-05-10	11:00:00																											225.16	0.03				3.94	0.45	9
2013-05-10	15:00:00																											174.51	0.14				3.88	0.28	9
2013-05-10	19:00:00																											221.21	0.2				3.84	0.23	9
2013-05-10	23:00:00																											113.39	0.04				3.96	0.27	9
2013-05-11	03:00:00																											226.73	0.16				3.92	0.21	-29
2013-05-11	07:00:00																											161.68	0.06				3.95	0.32	-29
2013-05-11	11:00:00																											186.73	0.03				3.92	0.34	-29
2013-05-11	15:00:00																											227.44	0.1				3.93	0.26	-29
2013-05-11	19:00:00																											211.13	0.13				3.86	0.27	-29
2013-05-11	23:00:00																											233.15	0.13				3.86	0.32	-29
2013-05-12	03:00:00																											230.4	0.22				3.94	0.2	-31
2013-05-12	07:00:00																											235.81	0.18				3.96	0.22	-31
2013-05-12	11:00:00																											254.18	0.05				4	0.97	-31
2013-05-12	15:00:00																											190.55	0.14				4.03	0.24	-31
2013-05-12	19:00:00																											230.61	0.1				3.99	0.29	-31
2013-05-12	23:00:00																											200.51	0.09				3.99	0.32	-31
2013-05-13	03:00:00																											218.08	0.17				4.04	0.22	-20
2013-05-13	07:00:00																											216.18	0.21				4.09	0.21	-20
2013-05-13	11:00:00																																		-20
2013-05-13	15:00:00																																		-20
2013-05-13	19:00:00																																		-20
2013-05-13	23:00:00																																		-20
2013-05-14	03:00:00																																		-25
2013-05-14	07:00:00																																		-25
2013-05-14	11:00:00																																		-25
2013-05-14	15:00:00																																		-25
2013-05-14	19:00:00																																		-25
2013-05-14	23:00:00																																		-25
2013-05-15	03:00:00																																		-18
2013-05-15	07:00:00																																		-18
2013-05-15	11:00:00																																		-18
2013-05-15	15:00:00																																		-18
2013-05-15	19:00:00																																		-18
2013-05-15	23:00:00																																		-18
2013-05-16	03:00:00																																		-1
2013-05-16	07:00:00																																		-1
2013-05-16	11:00:00																																		-1
2013-05-16	15:00:00																														902.65	27.2788			-1
2013-05-16	19:00:00																													0.2588	903.74	27.2812			-1
2013-05-16	23:00:00																													0.257875					-1
2013-05-17	03:00:00																													0.25805	904.08	27.2721			-13
2013-05-17	07:00:00																													0.2598	904.54	27.2692			-13
2013-05-17	11:00:00																													0.2572	903.49	27.2484			-13
2013-05-17	15:00:00																													0.25675	903.32	27.2626			-13
2013-05-17	19:00:00																											223.32	0.11	0.258425	904.5	27.2754	3.99	0.28	-13
2013-05-17	23:00:00																											255.78	0.07	0.260025	904.25	27.2915	3.93	0.46	-13
2013-05-18	03:00:00																											218.9	0.11	0.259325	903.83	27.2724	3.92	0.31	15
2013-05-18	07:00:00																											229.36	0.18	0.259975	904.42	27.2633	4	0.26	15
2013-05-18	11:00:00																											237.21	0.07	0.258875	903.82	27.2531	4.03	0.42	15
2013-05-18	15:00:00																											154.8	0.04	0.25715	903.25	27.2685	3.94	0.44	15
2013-05-18	19:00:00																											225.88	0.09	0.257075	904.37	27.2929	3.99	0.36	15
2013-05-18	23:00:00																											270.11	0.04	0.256325	904.47	27.2807	3.98	0.43	15
2013-05-19	03:00:00																											158.12	0.06	0.257225	903.61	27.2842	3.92	0.39	50
2013-05-19	07:00:00																											218.04	0.11	0.259725	904.16	27.2718	3.99	0.35	50
2013-05-19	11:00:00																											233.19	0.09	0.258225	904.11	27.2627	4	0.42	50
2013-05-19	15:00:00																											103.83	0.05	0.2571	903.28	27.2806	3.91	0.63	50
2013-05-19	19:00:00																											221.55	0.15	0.259125	904.2	27.2878	3.92	0.26	50
2013-05-19	23:00:00																											183.29	0.1	0.258825	904.71	27.2846	3.97	0.31	50
2013-05-20	03:00:00																											161.52	0.03	0.2563	903.53	27.2849	3.92	0.39	40
2013-05-20	07:00:00																											192.55	0.07	0.2575	903.81	27.2709	3.92	0.36	40
2013-05-20	11:00:00																											284.13	0.09	0.2586	904.35	27.2624	4.02	0.33	40
2013-05-20	15:00:00																											219.89	0.03	0.257275	903.43	27.2747	3.93	0.43	40
2013-05-20	19:00:00																											204.31	0.11	0.2616	904	27.3171	3.84	0.35	40
2013-05-20	23:00:00																											227.1	0.12	0.260175	904.95	27.2905	3.97	0.29	40
2013-05-21	03:00:00																											257.75	0.09	0.25985	903.58	27.3101	3.91	0.39	65
2013-05-21	07:00:00																											183.33	0.04	0.258075	903.35	27.2706	3.91	0.47	65
2013-05-21	11:00:00																											182.7	0.03	0.256225	904.45	27.2832	3.93	0.5	65
2013-05-21	15:00:00																											186.67	0.03	0.2597	903.7	27.3117	3.84	0.63	65
2013-05-21	19:00:00																											209.89	0.06	0.260425	903.79	27.3087	3.84	0.39	65
2013-05-21	23:00:00																											239.63	0.11	0.25865	905.1	27.3029	3.91	0.35	65
2013-05-22	03:00:00																											212.36	0.1	0.258525	903.78	27.2868	3.89	0.34	7
2013-05-22	07:00:00																											204.01	0.09	0.258425	902.9	27.2721	3.92	0.33	7
2013-05-22	11:00:00																											220.44	0.07	0.256225	904.37	27.2825	4.02	0.41	7
2013-05-22	15:00:00																											283.45	0.02	0.256575	904.03	27.288	3.93	0.54	7
2013-05-22	19:00:00																											87.35	0.05	0.2609	903.62	27.3189	3.84	0.53	7
2013-05-22	23:00:00																											236.84	0.18	0.263275	905.15	27.3122	3.85	0.25	7
2013-05-23	03:00:00																											239.04	0.19	0.26	904.15	27.3141	3.93	0.23	-2
2013-05-23	07:00:00																											118.49	0.04	0.258575	902.53	27.266	3.91	0.4	-2
2013-05-23	11:00:00																											204.81	0.04	0.258725	904.1	27.284	3.91	0.36	-2
2013-05-23	15:00:00																											199.85	0.05	0.259725	904.41	27.3147	3.99	0.36	-2
2013-05-23	19:00:00																											118.86	0.04	0.264175	903.53	27.3037	3.81	0.38	-2
2013-05-23	23:00:00																											202.59	0.11	0.263875	905.09	27.31	3.81	0.3	-2
2013-05-24	03:00:00																											232.01	0.24	0.2639	904.67	27.3027	3.87	0.18	3
2013-05-24	07:00:00																											231.55	0.14	0.261525	902.38	27.2714	3.97	0.26	3
2013-05-24	11:00:00																											175.06	0.04	0.257575	903.64	27.2588	3.94	0.35	3
2013-05-24	15:00:00																											156.72	0.03	0.258675	904.72	27.2955	3.89	0.42	3
2013-05-24	19:00:00																											166.92	0.03	0.257775	903.55	27.3154	3.92	0.47	3
2013-05-24	23:00:00																											205.1	0.12	0.2626	904.82	27.2942	3.86	0.29	3
2013-05-25	03:00:00																											234.29	0.22	0.2613	905.13	27.2908	3.99	0.18	-5
2013-05-25	07:00:00																											217.67	0.09	0.259675	902.49	27.2423	4.03	0.4	-5
2013-05-25	11:00:00																											179.56	0.06	0.26095	903.1	27.2836	3.9	0.37	-5
2013-05-25	15:00:00																											225.83	0.1	0.2617	904.89	27.3074	4	0.26	-5
2013-05-25	19:00:00																											32.15	0.04	0.266	903.74	27.2993	3.84	0.42	-5
2013-05-25	23:00:00																											175.54	0.07	0.2691	904.45	27.3116	3.79	0.35	-5
2013-05-26	03:00:00																											230.95	0.2	0.2653	905.47	27.3085	3.92	0.2	-23
2013-05-26	07:00:00																											181.14	0.15	0.261975	902.89	27.2722	3.99	0.25	-23
2013-05-26	11:00:00																											165.15	0.05	0.2613	902.61	27.2676	3.92	0.36	-23
2013-05-26	15:00:00																											213.57	0.12	0.267275	904.82	27.3405	3.87	0.33	-23
2013-05-26	19:00:00																											177.39	0.09	0.270825	904.01	27.3254	3.85	0.37	-23
2013-05-26	23:00:00																											119.16	0.05	0.267175	904.03	27.2972	3.81	0.41	-23
2013-05-27	03:00:00																											235.41	0.21	0.265925	905.53	27.2894	3.91	0.22	-87
2013-05-27	07:00:00																											232.09	0.11	0.2639	903.48	27.2821	3.99	0.28	-87
2013-05-27	11:00:00																											111.39	0.02	0.2652	902.28	27.2629	3.88	0.43	-87
2013-05-27	15:00:00																											207.5	0.07	0.26615	904.53	27.3102	3.88	0.39	-87
2013-05-27	19:00:00																											268.34	0.05	0.264525	904.36	27.3098	3.93	0.43	-87
2013-05-27	23:00:00																											179.42	0.06	0.270825	903.71	27.3052	3.8	0.44	-87
2013-05-28	03:00:00																											228.18	0.17	0.2674	905.31	27.2993	3.89	0.24	-33
2013-05-28	07:00:00																											236.69	0.16	0.264	904.11	27.2965	3.98	0.24	-33
2013-05-28	11:00:00																											337.59	0.1	0.2628	902.26	27.2603	3.93	0.35	-33
2013-05-28	15:00:00																											224.68	0.07	0.269425	904.14	27.3189	3.83	0.37	-33
2013-05-28	19:00:00																											236.37	0.21	0.277025	904.69	27.3285	3.79	0.3	-33
2013-05-28	23:00:00																											198.16	0.08	0.27345	903.59	27.2899	3.81	0.39	-33
2013-05-29	03:00:00																											222.35	0.06	0.2676	904.83	27.2802	3.92	0.54	9
2013-05-29	07:00:00																											230.39	0.09	0.26355	904.57	27.2927	4.02	0.38	9
2013-05-29	11:00:00																											197.35	0.04	0.265175	902.49	27.289	3.91	0.61	9
2013-05-29	15:00:00																											149.46	0.04	0.267725	903.69	27.3086	3.86	0.56	9
2013-05-29	19:00:00																											247.41	0.06	0.266425	904.88	27.3247	3.89	0.46	9
2013-05-29	23:00:00																											224.89	0.13	0.268325	903.69	27.3055	3.81	0.31	9
2013-05-30	03:00:00																											229.29	0.15	0.265275	904.29	27.2825	3.92	0.3	-12
2013-05-30	07:00:00																											281.08	0.09	0.2625	904.77	27.2517	3.97	0.43	-12
2013-05-30	11:00:00																											88.44	0.04	0.26265	902.93	27.278	3.89	0.57	-12
2013-05-30	15:00:00																											167.99	0.08	0.267775	903.34	27.3236	3.81	0.51	-12
2013-05-30	19:00:00																											237.69	0.2	0.2735	904.9	27.3223	3.8	0.26	-12
2013-05-30	23:00:00																											192.56	0.03	0.264275	903.95	27.2935	3.84		-12
2013-05-31	03:00:00																											206.74	0.04	0.26255	903.79	27.2972	3.86	0.4	-1
2013-05-31	07:00:00																											216.06	0.09	0.2663	904.71	27.2803	3.92	0.36	-1
2013-05-31	11:00:00																											181.97	0.03	0.263475	903.45	27.2722	3.93	0.44	-1
2013-05-31	15:00:00																											150.08	0.04	0.26305	903.16	27.2931	3.91	0.5	-1
2013-05-31	19:00:00																											202.17	0.06	0.265625	904.78	27.3021	3.85	0.61	-1
2013-05-31	23:00:00																											228.71	0.16	0.26405	904.31	27.2935	3.92	0.38	-1
2013-06-01	03:00:00																											198.2	0.08	0.262325	903.46	27.2691	3.93	0.37	54
2013-06-01	07:00:00																											260.68	0.04	0.26375	904.39	27.2571	3.92	0.99	54
2013-06-01	11:00:00																											151.5	0.04	0.263225	903.91	27.2975	3.92	0.77	54
2013-06-01	15:00:00	16	1	0	0	1	0	3	0	0	0	0	1	0	0	0	0	1	0	0	0	0	3	0	0	0	0	187.01	0.03	0.263325	903.17	27.3072	3.87	1.46	54
2013-06-01	19:00:00	7	0	1	0	0	0	3	0	0	0	0	0	0	0	0	0	0	0	0	0	0	1	0	0	0	0	202.31	0.07	0.26285	904.56	27.2983	3.93	1.17	54
2013-06-01	23:00:00	17	2	3	0	0	0	2	0	0	0	0	0	0	0	0	0	0	0	0	0	0	6	0	0	0	0	227.14	0.07	0.264575	904.65	27.2956	3.94	0.6	54
2013-06-02	03:00:00	8	1	1	0	0	0	1	0	0	0	0	0	0	0	0	1	1	0	0	0	0	4	0	0	0	0	207.28	0.07	0.2625	903.33	27.2683	3.96	1.16	40
2013-06-02	07:00:00	18	1	1	0	0	0	0	0	0	0	0	0	0	0	0	0	1	0	0	0	0	4	0	0	0	0	146.5	0.03	0.25985	903.95	27.2824	3.96	1.08	40
2013-06-02	11:00:00	20	2	2	0	1	0	1	0	0	0	0	0	0	3	0	0	0	0	0	0	0	3	0	0	0	0	170.89	0.03	0.259925	904.25	27.2977	3.95	1.51	40
2013-06-02	15:00:00	14	0	4	0	0	0	0	0	0	0	0	0	0	0	0	1	0	0	0	0	0	3	0	0	0	0	195.28	0.03	0.2595	903.36	27.2896	3.95	1.9	40
2013-06-02	19:00:00	15	0	1	0	0	0	0	0	0	0	0	0	0	0	1	4	0	0	0	0	0	6	1	0	0	0	227.42	0.05	0.26045	904.3	27.2841	3.93	0.94	40
2013-06-02	23:00:00	15	0	1	1	0	0	0	0	0	0	0	0	0	0	1	1	2	0	0	0	0	6	0	0	0	0	225.71	0.07	0.261975	904.92	27.2831	3.93	1.84	40
2013-06-03	03:00:00	13	0	0	0	0	0	0	0	0	0	0	0	0	0	0	1	1	0	0	0	0	5	0	0	0	0	178	0.05	0.261175	903.4	27.269	3.92	1.03	25
2013-06-03	07:00:00	17	0	0	0	0	0	1	0	0	0	0	0	0	0	0	0	0	0	0	0	0	15	0	0	0	0	177.75	0.07	0.2599	903.49	27.2651	3.99	1.31	25
2013-06-03	11:00:00	18	1	1	0	1	0	1	0	0	0	0	0	0	0	0	0	4	0	0	0	0	12	0	0	0	0	172.85	0.02	0.258975	904.4	27.2881	3.95	1.13	25
2013-06-03	15:00:00	12	0	1	0	1	0	0	0	0	0	0	0	0	0	0	2	1	0	0	0	0	13	0	0	0	0	149.03	0.04	0.2634	903.65	27.3183	3.87	0.94	25
2013-06-03	19:00:00	15	0	0	0	1	0	1	0	0	0	0	0	0	0	2	2	0	0	0	0	0	13	0	0	0	0	220.57	0.09	0.265825	904.07	27.3168	3.86	0.77	25
2013-06-03	23:00:00	17	0	3	0	0	0	1	0	0	0	0	0	0	0	0	1	0	0	0	0	0	13	0	0	0	0	226.43	0.07	0.26435	905.08	27.2967	3.93	1.48	25
2013-06-04	03:00:00	16	1	0	0	0	0	1	0	0	0	0	0	0	0	0	0	0	0	0	0	0	17	0	0	0	0	217.34	0.08	0.263425	903.67	27.2834	3.93	1.07	34
2013-06-04	07:00:00	14	0	1	0	0	0	0	0	0	0	0	0	0	1	1	2	0	0	1	0	0	5	0	0	0	0	139.29	0.05	0.265275	903.14	27.2952	3.84	0.83	34
2013-06-04	11:00:00	15	0	2	0	1	0	0	0	0	0	0	0	0	0	0	0	0	0	0	0	0	17	0	0	0	0	220.69	0.11	0.2643	904.4	27.2916	3.89	0.52	34
2013-06-04	15:00:00	10	0	0	0	0	0	0	0	0	0	0	0	0	0	0	2	0	0	0	0	0	5	0	0	0	0	138.18	0.06	0.2611	904	27.3037	3.93	0.99	34
2013-06-04	19:00:00	10	1	3	0	0	0	0	0	0	0	0	1	0	0	1	0	0	0	0	0	0	11	0	0	0	0	171.17	0.03	0.266175	903.91	27.3166	3.79	0.75	34
2013-06-04	23:00:00	12	1	0	0	1	0	0	0	0	0	0	1	0	0	0	0	0	0	0	0	0	9	0	0	0	0	211.61	0.06	0.264425	905.13	27.3176	3.87	0.56	34
2013-06-05	03:00:00	14	2	1	0	2	0	0	0	0	0	0	1	0	0	0	2	0	0	0	0	0	13	0	0	0	0	246.62	0.16	0.26795	904.01	27.3196	3.83	1.08	34
2013-06-05	07:00:00	12	2	3	0	0	0	2	0	0	0	0	0	0	0	0	1	0	0	0	0	0	16	0	0	0	0	106.23	0.03	0.2664	902.88	27.3004	3.81	1.22	34
2013-06-05	11:00:00																											206.94	0.07	0.267525	904.22	27.3053	3.78	0.99	34
2013-06-05	15:00:00	12	1	2	0	0	0	2	0	0	0	0	1	0	0	0	4	0	0	0	0	0	8	0	0	0	0	184.32	0.03	0.26155	904.28	27.3176	3.89	1.15	34
2013-06-05	19:00:00	9	0	5	0	5	0	5	0	0	0	0	0	0	0	0	0	0	0	0	0	0	10	0	0	0	0	52.5	0.02	0.269125	903.81	27.3297	3.74	1.02	34
2013-06-05	23:00:00	15	0	2	0	2	0	1	0	0	0	0	0	0	2	0	4	1	0	0	0	0	16	0	0	0	0	191.02	0.11	0.277325	905.04	27.3366	3.67	0.46	34
2013-06-06	03:00:00	16	0	2	0	4	0	2	0	0	0	0	0	0	1	0	3	1	0	0	0	0	14	0	0	0	0	235.41	0.22	0.27365	904.33	27.3315	3.75	0.99	10
2013-06-06	07:00:00	15	2	2	0	3	0	1	0	0	0	0	0	0	0	1	1	0	0	0	0	0	12	0	0	0	0	264.43	0.06	0.267475	902.73	27.3087	3.79	0.4	10
2013-06-06	11:00:00	16	0	1	0	3	0	1	0	0	0	0	0	0	0	0	3	0	0	0	0	0	39	0	0	0	0	310.02	0.04	0.26895	903.94	27.3156	3.73	0.46	10
2013-06-06	15:00:00																											294.51	0.08	0.26625	904.5	27.3254	3.82	0.54	10
2013-06-06	19:00:00																											188.33	0.08	0.272225	903.78	27.3413	3.72	0.36	10
2013-06-06	23:00:00	15	0	0	0	0	0	4	0	0	0	0	0	0	0	0	1	0	0	0	0	0	8	0	0	0	0	256.8	0.16	0.2819	904.89	27.3441	3.66	0.44	10
2013-06-07	03:00:00	18	1	0	0	2	0	2	0	0	0	0	0	0	0	0	0	0	0	0	0	0	38	0	0	0	0	241.02	0.18	0.274575	904.63	27.3222	3.75	0.41	9
2013-06-07	07:00:00	15	3	0	0	1	0	2	0	0	0	0	0	0	0	0	2	0	0	0	0	0	43	0	0	0	0	300.15	0.09	0.270975	902.74	27.3335	3.81	0.45	9
2013-06-07	11:00:00	15	0	1	0	0	0	0	0	0	0	0	0	0	0	0	0	0	0	0	0	0	16	0	0	0	0	220.67	0.07	0.274325	903.62	27.3063	3.74	0.5	9
2013-06-07	15:00:00	15	3	3	0	1	0	2	0	0	0	0	0	0	0	0	1	0	0	0	0	0	11	1	0	0	0	243.31	0.08	0.26645	904.63	27.3097	3.87	0.43	9
2013-06-07	19:00:00	15	0	1	0	1	0	0	0	0	1	1	1	0	0	1	1	0	0	0	0	0	17	1	0	0	0	114.81	0.06	0.272825	903.81	27.3335	3.73	0.43	9
2013-06-07	23:00:00	13	1	1	0	0	1	3	0	0	1	0	0	0	0	0	0	0	0	0	0	0	6	0	0	0	0	179.44	0.13	0.28075	904.69	27.347	3.68	0.44	9
2013-06-08	03:00:00	12	1	0	0	1	0	2	0	0	0	0	0	0	1	0	0	0	0	0	0	0	3	1	0	0	0	231.53	0.28	0.27435	904.88	27.3442	3.77	0.37	1
2013-06-08	07:00:00	15	0	0	0	0	0	1	0	0	0	0	0	3	0	0	0	0	0	0	0	0	7	0	0	0	0	235.85	0.1	0.26875	902.86	27.2822	3.84	0.57	1
2013-06-08	11:00:00	14	0	0	0	0	0	0	0	0	0	0	0	0	0	0	0	0	0	0	0	0	13	0	0	0	0	321.64	0.15	0.262075	903.32	27.3006	3.86	0.55	1
2013-06-08	15:00:00	11	0	2	0	0	0	1	0	0	0	0	0	0	0	1	1	0	0	0	0	0	18	0	1	0	0	248.05	0.11	0.2701	904.69	27.3129	3.8	0.7	1
2013-06-08	19:00:00	19	1	0	0	0	0	1	0	0	0	0	0	0	0	0	6	1	0	0	0	0	13	0	0	0	0	233.78	0.09	0.26195	903.91	27.3118	3.87	0.46	1
2013-06-08	23:00:00	14	0	2	0	0	0	0	0	0	0	1	0	0	0	0	1	0	0	0	0	0	11	0	0	0	0	264.24	0.12	0.269325	904.48	27.3064	3.81	0.5	1
2013-06-09	03:00:00	16	0	0	0	1	0	1	0	0	0	0	0	0	0	0	1	0	0	0	0	0	31	0	0	0	0	235.88	0.25	0.264475	905.07	27.2958	3.88	0.35	1
2013-06-09	07:00:00	11	0	0	0	0	0	0	0	0	0	0	0	0	0	0	1	0	0	0	0	0	21	0	0	0	0	200.3	0.12	0.260425	903.1	27.2441	4.01	0.47	1
2013-06-09	11:00:00	12	0	1	0	0	0	0	0	0	0	1	0	0	0	0	1	0	0	0	0	0	8	0	0	0	0	313.29	0.11	0.2539	903.05	27.2698	3.99	0.35	1
2013-06-09	15:00:00	17	0	0	0	0	0	0	0	0	0	0	0	0	0	0	0	0	0	0	0	0	18	0	0	0	0	235.55	0.07	0.2565	904.66	27.2975	4	0.57	1
2013-06-09	19:00:00	14	0	1	0	0	0	1	0	0	0	0	0	0	0	0	3	0	0	0	0	0	7	0	0	0	0	186.7	0.07	0.260875	904.04	27.2906	3.92	0.68	1
2013-06-09	23:00:00	14	0	3	0	1	0	0	0	0	0	0	0	0	0	0	0	0	0	0	0	0	16	0	1	0	0	160.22	0.06	0.2581	904.26	27.2813	3.95	0.93	1
2013-06-10	03:00:00	14	0	1	0	1	0	0	0	0	0	0	0	0	0	0	2	0	0	0	0	0	8	0	0	0	0	237.62	0.15	0.2623	905.13	27.2526	4.01	0.58	26
2013-06-10	07:00:00	13	3	0	0	1	0	0	0	0	0	0	0	0	0	0	1	0	0	0	0	0	28	0	0	0	0	313.83	0.12	0.258425	903.38	27.22	4.04	0.61	26
2013-06-10	11:00:00	14	3	1	0	0	0	0	0	0	0	0	0	0	0	0	1	0	0	0	0	0	45	0	0	0	0	178.18	0.08	0.25985	902.85	27.2885	3.93	0.51	26
2013-06-10	15:00:00	17	1	0	0	0	0	0	0	0	0	0	0	0	0	0	1	0	0	0	0	0	13	0	0	0	0	253.71	0.13	0.26445	904.54	27.3085	3.92	0.63	26
2013-06-10	19:00:00	11	0	2	0	4	0	0	0	0	0	0	0	0	0	0	0	0	0	0	0	0	7	0	0	0	0	215.18	0.08	0.2637	904.19	27.2968	3.87	0.63	26
2013-06-10	23:00:00	6	0	0	0	5	0	1	0	0	0	0	0	0	0	1	0	0	0	0	0	0	0	0	0	0	0	90.37	0.08	0.263575	904.07	27.3093	3.84	0.63	26
2013-06-11	03:00:00	14	0	1	0	10	0	0	0	0	0	0	0	0	0	0	0	0	0	0	0	0	4	0	0	0	0	240.94	0.23	0.266125	905.1	27.2963	3.87	0.5	-11
2013-06-11	07:00:00	16	0	3	0	1	0	0	0	0	0	0	0	0	0	0	4	0	0	0	0	0	5	0	0	0	0	154.83	0.11	0.260025	903.7	27.2649	3.99	0.41	-11
2013-06-11	11:00:00	13	0	2	0	7	0	0	0	0	0	0	0	0	0	0	0	0	0	0	0	0	35	0	0	0	0	124.93	0.07	0.264125	902.75	27.2738	3.84	0.71	-11
2013-06-11	15:00:00	15	0	3	0	1	0	1	0	0	0	0	0	0	0	0	3	0	0	0	0	0	11	0	0	0	0	233.95	0.14	0.262625	904.41	27.2982	3.89	0.63	-11
2013-06-11	19:00:00	17	0	0	0	4	0	0	0	0	0	0	0	0	0	0	3	0	0	0	0	0	9	0	0	0	0	226	0.11	0.263325	904.36	27.3128	3.86	0.54	-11
2013-06-11	23:00:00	15	0	0	0	0	0	0	0	0	0	0	0	0	0	0	0	0	0	0	0	0	35	0	0	0	0	122.47	0.1	0.269675	903.91	27.2953	3.75	0.78	-11
2013-06-12	03:00:00	12	0	0	0	0	0	0	0	0	0	0	0	0	0	0	0	0	0	0	0	0	10	0	0	0	0	239.48	0.13	0.264925	904.97	27.2977	3.86	0.69	-51
2013-06-12	07:00:00	16	1	1	0	1	0	0	0	0	0	0	0	0	0	0	3	0	0	0	0	0	34	0	0	0	0	271.46	0.11	0.2621	904	27.286	3.91	0.64	-51
2013-06-12	11:00:00	10	0	0	0	2	0	2	0	0	0	0	0	0	1	0	1	0	0	0	0	0	49	0	0	0	0	168.39	0.12	0.262175	902.74	27.2875	3.85	0.58	-51
2013-06-12	15:00:00	14	0	1	0	0	0	0	0	0	0	0	0	0	0	0	0	0	0	0	0	0	18	0	0	0	0	194.92	0.04	0.262625	904.18	27.295	3.88	0.89	-51
2013-06-12	19:00:00	13	3	0	0	0	2	6	0	0	0	0	0	0	1	0	1	0	0	0	0	0	2	0	0	0	0	167.33	0.15	0.259425	904.5	27.2879	3.94	0.68	-51
2013-06-12	23:00:00	15	0	0	0	0	3	5	0	0	0	0	0	0	1	0	0	0	0	0	0	0	1	0	0	0	0	174.94	0.06	0.261175	903.8	27.2977	3.86	0.89	-51
2013-06-13	03:00:00	14	3	0	0	0	4	2	0	0	0	0	0	0	0	0	5	0	0	0	0	0	3	0	0	0	0	234.74	0.2	0.2634	904.72	27.2926	3.86	0.52	-60
2013-06-13	07:00:00	14	0	0	0	1	0	0	0	0	0	0	0	0	3	0	0	0	0	0	0	0	4	0	1	0	0	238.96	0.23	0.2621	904.25	27.2765	3.91	0.39	-60
2013-06-13	11:00:00	15	0	0	0	0	1	4	0	0	0	0	0	0	0	1	0	0	0	0	0	0	11	0	0	0	0	221.13	0.07	0.257375	902.82	27.2461	4	0.52	-60
2013-06-13	15:00:00	13	0	2	0	0	1	2	0	0	0	0	0	0	0	0	0	0	0	1	0	0	4	0	0	0	0	126.36	0.06	0.253775	903.96	27.247	4	0.63	-60
2013-06-13	19:00:00	15	0	3	0	0	0	0	0	0	0	0	0	0	0	0	0	0	0	0	1	0	2	0	0	0	0	293.74	0.03	0.25375	904.63	27.2632	4.04	0.7	-60
2013-06-13	23:00:00	14	1	0	0	0	1	4	0	0	0	0	0	0	0	0	1	0	0	0	0	0	2	0	0	0	0	223.82	0.03	0.257575	903.78	27.2676	3.98	1	-60
2013-06-14	03:00:00	15	0	2	0	0	3	6	0	0	0	0	0	0	1	0	3	0	0	0	0	0	8	0	0	0	0	242.67	0.12	0.2565	904.4	27.2491	4.03	0.54	-4
2013-06-14	07:00:00	14	1	0	0	0	0	0	0	0	0	0	0	0	0	0	1	0	0	0	0	0	13	0	0	0	0	230.54	0.21	0.258475	904.41	27.2462	4.07	0.42	-4
2013-06-14	11:00:00	8	0	2	0	0	2	1	0	0	0	0	0	0	0	0	1	0	0	0	0	0	0	0	0	0	0	212.08	0.11	0.260175	902.99	27.2128	4.14	0.55	-4
2013-06-14	15:00:00	16	0	2	0	1	0	1	0	0	0	0	0	1	0	2	3	0	0	0	0	0	3	0	0	0	0	241.34	0.18	0.252675	903.74	27.2245	4.12	0.59	-4
2013-06-14	19:00:00	14	2	0	0	0	0	4	0	0	0	0	0	0	0	0	0	0	0	0	0	0	4	0	0	0	1	205.5	0.06	0.2541	904.73	27.2504	4.12	0.81	-4
2013-06-14	23:00:00	16	0	0	0	0	0	0	0	0	0	0	0	0	0	0	0	0	0	0	0	0	7	0	0	0	0	280.85	0.07	0.258	903.87	27.2501	4.11	0.88	-4
2013-06-15	03:00:00	14	0	0	0	0	0	0	0	0	0	0	0	0	0	0	4	0	0	0	0	0	10	0	0	0	0	311.01	0.04	0.256275	904.09	27.2277	4.17	0.99	1
2013-06-15	07:00:00	12	0	0	0	0	0	0	0	0	0	0	0	0	1	0	0	0	0	0	0	0	13	0	0	0	0	237.66	0.15	0.2632	904.51	27.2128	4.17	0.57	1
2013-06-15	11:00:00	13	0	0	0	0	0	1	0	0	0	0	0	0	0	0	0	0	0	0	0	0	6	0	0	0	0	309.31	0.14	0.26245	903.28	27.1939	4.19	0.73	1
2013-06-15	15:00:00	12	0	1	0	2	1	2	0	0	0	0	0	0	1	0	2	1	0	0	0	0	1	0	0	0	0	108.1	0.05	0.2552	903.57	27.2453	4.12	0.9	1
2013-06-15	19:00:00	14	4	2	0	0	1	1	0	0	0	0	0	0	1	0	0	0	0	0	0	0	3	0	0	0	0	244.91	0.12	0.259475	904.77	27.2858	4.08	0.75	1
2013-06-15	23:00:00	15	1	0	0	0	3	1	0	0	0	0	0	0	3	0	0	0	0	0	0	0	8	0	0	0	0	116.22	0.08	0.259275	904.05	27.2662	4.08	0.78	1
2013-06-16	03:00:00	13	2	0	0	0	0	1	0	0	0	0	0	0	1	0	0	0	0	0	0	0	8	0	0	0	0	249.49	0.03	0.255175	903.77	27.2693	3.98	1.04	52
2013-06-16	07:00:00	15	1	1	0	0	0	0	0	0	0	0	0	0	0	0	2	0	0	0	0	0	9	0	0	0	0	242.06	0.11	0.25745	904.44	27.2754	4.01	0.77	52
2013-06-16	11:00:00	13	0	0	0	0	0	0	0	0	0	0	0	0	0	0	1	1	0	0	0	0	12	0	0	0	0	250.45	0.04	0.255725	903.6	27.2768	3.98	0.97	52
2013-06-16	15:00:00	14	0	2	0	0	0	1	0	0	0	0	0	0	1	0	0	4	0	0	0	0	2	0	0	0	0	251.67	0.16	0.254725	903.46	27.2797	3.92	1.03	52
2013-06-16	19:00:00	11	2	4	0	0	0	0	0	0	0	0	0	0	1	0	1	0	0	0	0	0	3	0	0	0	0	244.62	0.17	0.25645	904.75	27.3039	3.89	0.75	52
2013-06-16	23:00:00																											315.05	0.07	0.255575	904.28	27.2939	3.92	0.98	52
2013-06-17	03:00:00	13	0	0	0	0	0	0	0	0	0	0	0	0	0	0	0	0	0	0	0	0	8	0	0	0	0	309.07	0.03	0.25455	903.46	27.2814	3.91	1.33	39
2013-06-17	07:00:00	12	3	1	0	0	0	2	0	0	0	0	2	0	1	0	1	0	0	0	0	0	5	0	0	0	0	245.07	0.11	0.253475	904.21	27.2804	3.93	0.94	39
2013-06-17	11:00:00	12	0	0	0	1	0	0	0	0	0	0	2	0	0	0	1	0	0	0	0	0	2	0	0	0	1	130.99	0.04	0.25215	903.91	27.2755	3.92	1.33	39
2013-06-17	15:00:00	12	0	1	0	2	0	1	0	0	0	0	0	0	0	0	0	0	0	0	0	0	14	0	0	0	0	334.45	0.19	0.2529	903.43	27.2788	3.89	0.62	39
2013-06-17	19:00:00	7	1	1	0	0	0	0	0	0	0	0	0	0	0	0	2	0	0	0	0	0	4	0	0	1	0	237.62	0.12	0.256225	904.65	27.2848	3.87	0.53	39
2013-06-17	23:00:00																											248.64	0.16	0.25715	904.59	27.2781	3.88	0.49	39
2013-06-18	03:00:00																											138.25	0.04	0.255125	903.29	27.2636	3.92	0.68	37
2013-06-18	07:00:00																											169.43	0.08	0.2549	903.86	27.2621	3.95	0.6	37
2013-06-18	11:00:00																											291.57	0.06	0.2507	904.2	27.2544	4	0.55	37
2013-06-18	15:00:00																											174.8	0.16	0.251075	903.51	27.2559	3.95	0.44	37
2013-06-18	19:00:00																											222.86	0.1	0.251575	904.47	27.2786	3.95	0.65	37
2013-06-18	23:00:00																											236.26	0.15	0.252575	904.92	27.2709	4.01	0.53	37
2013-06-19	03:00:00																											254.94	0.1	0.2536	903.28	27.2498	4	0.7	37
2013-06-19	07:00:00																											53.37	0.02	0.250675	903.39	27.2401	4.04	0.84	37
2013-06-19	11:00:00																											245.48	0.05	0.249725	904.36	27.2539	4.08	0.74	37
2013-06-19	15:00:00																											313.31	0.18	0.251275	903.7	27.2787	3.98	0.72	37
2013-06-19	19:00:00																											209.37	0.06	0.251675	904.24	27.284	3.99	0.87	37
2013-06-19	23:00:00																											236.04	0.18	0.25295	905.19	27.2746	4.05	0.53	37
2013-06-20	03:00:00																											234.88	0.1	0.252825	903.48	27.2429	4.04	0.77	39
2013-06-20	07:00:00																											256.5	0.08	0.2525	902.9	27.2354	4.09	0.78	39
2013-06-20	11:00:00																											250.54	0.03	0.2509	904.36	27.2664	4.08	0.98	39
2013-06-20	15:00:00																											220.73	0.05	0.25275	903.98	27.2745	4.01	2.1	39
2013-06-20	19:00:00																											223.58	0.04	0.2519	903.99	27.2781	3.95	1.06	39
2013-06-20	23:00:00																											244.48	0.15	0.2535	905.37	27.2694	4.04	0.7	39
2013-06-21	03:00:00																											267.68	0.12	0.25405	903.91	27.2462	4.08	0.79	5
2013-06-21	07:00:00																											336.2	0.13	0.251825	902.51	27.2229	4.07	0.65	5
2013-06-21	11:00:00																											231.66	0.04	0.25125	904.17	27.2777	4.07	1.11	5
2013-06-21	15:00:00																											174.29	0.1	0.2535	904.35	27.2871	3.95	0.99	5
2013-06-21	19:00:00																											245.26	0.06	0.253025	903.77	27.2736	3.98	1.2	5
2013-06-21	23:00:00																											245.6	0.19	0.25425	905.31	27.2666	3.97	0.79	5
2013-06-22	03:00:00																											183.94	0.11	0.2546	904.46	27.2534	4.05	0.93	12
2013-06-22	07:00:00																											326.42	0.21	0.2524	902.28	27.2262	4.03	0.9	12
2013-06-22	11:00:00																											345.12	0.1	0.250975	903.75	27.2835	3.98	0.86	12
2013-06-22	15:00:00																											238.08	0.16	0.25565	904.65	27.2994	3.9	0.69	12
2013-06-22	19:00:00																											184.68	0.04	0.254575	903.65	27.2678	3.96	1.07	12
2013-06-22	23:00:00																											227.53	0.13	0.2549	905.05	27.2643	4.01	0.8	12
2013-06-23	03:00:00																											242.32	0.13	0.25615	905.02	27.2411	4.12	0.77	5
2013-06-23	07:00:00																											153.71	0.09	0.25375	902.36	27.2258	4.05	0.72	5
2013-06-23	11:00:00																											328.2	0.1	0.251725	903.22	27.2718	4	2.56	5
2013-06-23	15:00:00																											245.58	0.13	0.255325	904.86	27.2982	3.96	1.45	5
2013-06-23	19:00:00																											103.36	0.05	0.254375	903.69	27.2674	3.93	1.08	5
2013-06-23	23:00:00																											223.88	0.13	0.254575	904.58	27.2689	3.98	0.77	5
2013-06-24	03:00:00																											235.69	0.18	0.256	905.42	27.2557	4.03	0.63	-2
2013-06-24	07:00:00																											235.59	0.09	0.25575	902.74	27.2206	4.09	0.73	-2
2013-06-24	11:00:00																											192.13	0.1	0.253825	902.74	27.239	4.04	0.8	-2
2013-06-24	15:00:00																											170.81	0.11	0.253125	904.9	27.2862	4	0.91	-2
2013-06-24	19:00:00																											273.72	0.13	0.25645	903.93	27.2839	3.93	0.91	-2
2013-06-24	23:00:00																											101.58	0.04	0.253875	904.09	27.2647	3.94	1.15	-2
2013-06-25	03:00:00																											245.88	0.19	0.255675	905.55	27.2698	4	0.74	31
2013-06-25	07:00:00																											208.85	0.11	0.256425	903.33	27.241	4.04	1.08	31
2013-06-25	11:00:00																											242.19	0.12	0.253625	902.42	27.2241	4.03	1.13	31
2013-06-25	15:00:00																											340.25	0.04	0.255625	904.76	27.2568	4.09	1.36	31
2013-06-25	19:00:00																											259.19	0.16	0.25375	904.29	27.2857	3.97	1.09	31
2013-06-25	23:00:00																											210.91	0.12	0.253575	903.67	27.2755	3.95	1.36	31
2013-06-26	03:00:00																											235.64	0.26	0.2566	905.34	27.286	3.94	0.68	-6
2013-06-26	07:00:00																											272.47	0.15	0.259425	903.95	27.2334	4.11	1.07	-6
2013-06-26	11:00:00																											327.32	0.35	0.257375	902.35	27.2326	4.07	0.95	-6
2013-06-26	15:00:00																											218.03	0.14	0.2577	904.47	27.296	4.02	1.4	-6
2013-06-26	19:00:00																											233.9	0.14	0.260275	904.66	27.274	3.93	1.31	-6
2013-06-26	23:00:00																											177.11	0.04	0.2558	903.47	27.2571	3.98	2.04	-6
2013-06-27	03:00:00																											242.63	0.2	0.259	904.86	27.2626	4.01	1.08	-40
2013-06-27	07:00:00																											270.01	0.14	0.261625	904.43	27.2625	4.12	1.34	-40
2013-06-27	11:00:00																											257.09	0.08	0.259225	902.52	27.2126	4.05	1.36	-40
2013-06-27	15:00:00																											130.56	0.12	0.25985	904.1	27.3035	3.94	1.62	-40
2013-06-27	19:00:00																											239.9	0.17	0.2633	904.95	27.2911	3.94	1.5	-40
2013-06-27	23:00:00																											147.54	0.06	0.2611	903.5	27.2658	3.99	1.72	-40
2013-06-28	03:00:00																											207.7	0.14	0.260325	904.3	27.2789	3.95	1.48	-54
2013-06-28	07:00:00																											271.63	0.13	0.264	904.67	27.2509	4.11	1.44	-54
2013-06-28	11:00:00																											22.3	0.09	0.25965	902.91	27.2743	3.97	1.6	-54
2013-06-28	15:00:00																											265.89	0.21	0.260725	903.77	27.3137	3.92	1.94	-54
2013-06-28	19:00:00																											234.67	0.25	0.26335	905.07	27.2934	3.91	1.25	-54
2013-06-28	23:00:00																											228.24	0.09	0.261575	903.73	27.2491	3.97	1.36	-54
2013-06-29	03:00:00																											200.09	0.14	0.260575	903.78	27.2999	3.93	1.65	-7
2013-06-29	07:00:00																											247.46	0.12	0.260675	904.64	27.2836	4.03	1.71	-7
2013-06-29	11:00:00																											181.83	0.09	0.260075	903.36	27.2544	3.94	1.12	-7
2013-06-29	15:00:00																											291.66	0.12	0.26285	903.55	27.3069	3.89	1.11	-7
2013-06-29	19:00:00																											241.93	0.14	0.263375	905.04	27.3017	3.93	1.24	-7
2013-06-29	23:00:00																											242.33	0.17	0.2619	904.07	27.2638	3.93	1.64	-7
2013-06-30	03:00:00																											237.45	0.03	0.2592	903.41	27.2517	4	1.85	16
2013-06-30	07:00:00																											268.99	0.11	0.2587	904.4	27.2628	4.02	1.52	16
2013-06-30	11:00:00																											158.34	0.08	0.259725	903.78		3.92	1.57	16
2013-06-30	15:00:00																											202.17	0.13	0.2587	903.48		4	2.2	16
2013-06-30	19:00:00																											246.38	0.18	0.260325	904.87	27.287	3.95	1.68	16
2013-06-30	23:00:00																											286.41	0.25	0.256475	904.44	27.2378	4.02	1.77	16
2013-07-01	03:00:00																											300.33	0.09	0.25585	903.25	27.2855	3.99	1.81	48
2013-07-01	07:00:00																											269.39	0.18	0.25625	904.03	27.2697	4.02	1.48	48
2013-07-01	11:00:00																											245.52	0.04	0.254525	904.11	27.2703	3.99	2.09	48
2013-07-01	15:00:00																											208.99	0.06	0.254425	903.55	27.2762	3.96	1.84	48
2013-07-01	19:00:00																											236.17	0.24	0.258275	904.63	27.2798	3.98	1.05	48
2013-07-01	23:00:00																											231.73	0.12	0.25745	904.75	27.2553	4.05	1.22	48
2013-07-02	03:00:00																											192.32	0.03	0.2555	903.27	27.2386	4.03	1.98	74
2013-07-02	07:00:00																											230.39	0.08	0.255625	903.6	27.2587	4.03	1.3	74
2013-07-02	11:00:00																											145.78	0.03	0.25605	904.29	27.2595	4.03	1.42	74
2013-07-02	15:00:00																											232.2	0.06	0.256425	903.74	27.2757	3.99	3.28	74
2013-07-02	19:00:00																											102.83	0.05	0.2546	904.39	27.2754	3.98	2.45	74
2013-07-02	23:00:00																											151.27	0.04	0.255725	904.96	27.2747	4.01	2.23	74
2013-07-03	03:00:00																											245.22	0.07	0.254675	903.45	27.2644	4.03	2.51	62
2013-07-03	07:00:00																											214.03	0.09	0.2577	903.22	27.2593	4.03	2.35	62
2013-07-03	11:00:00																											160.8	0.03	0.25555	904.32	27.2687	3.98	2.49	62
2013-07-03	15:00:00																											193.03	0.03	0.253975	903.96	27.2913	3.98	2.45	62
2013-07-03	19:00:00																											186.3	0.14	0.2606	904.15	27.3135	3.88	2.82	62
2013-07-03	23:00:00																											229.86	0.18	0.25975	905.03	27.2736	3.94	0.82	62
2013-07-04	03:00:00																											202.03	0.05	0.255375	903.73	27.2692	3.95	2.03	58
2013-07-04	07:00:00																											140.48	0.03	0.2529	902.94	27.2715	3.91	2.04	58
2013-07-04	11:00:00																											204.56	0.08	0.255225	904.2	27.2751	3.98	1.69	58
2013-07-04	15:00:00																											82.02	0.06	0.254675	904.17	27.3083	3.98	2.56	58
2013-07-04	19:00:00																											163.86	0.05	0.261575	903.98	27.3119	3.83	2.22	58
2013-07-04	23:00:00																											232.67	0.15	0.26285	905.03	27.3012	3.85	1.3	58
2013-07-04	03:00:00																											236.89	0.16	0.256125	904.05	27.2857	3.93	1.64	64
2013-07-05	07:00:00																											105.1	0.02	0.25385	902.76	27.2794	3.9	2.16	64
2013-07-05	11:00:00																											197.81	0.04	0.256975	903.99	27.2851	3.89	3.46	64
2013-07-05	15:00:00																											182.15	0.03	0.25825	904.37	27.3018	3.87	2.38	64
2013-07-05	19:00:00																											120.75	0.03	0.25575	903.88	27.3114	3.86	2.38	64
2013-07-05	23:00:00																											236.84	0.19	0.26385	904.95	27.3127	3.81	1.17	64
2013-07-06	03:00:00																											240.75	0.14	0.258	904.42	27.2863	3.9	1.53	70
2013-07-06	07:00:00																											245.12	0.02	0.25485	902.71	27.3057	3.88	2.63	70
2013-07-06	11:00:00																											187.09	0.05	0.25765	903.74	27.2641	3.9	1.75	70
2013-07-06	15:00:00																											100.65	0.05	0.25395	904.52	27.2863	3.96	2.94	70
2013-07-06	19:00:00																											213.89	0.04	0.258875	903.82	27.3086	3.84	2.88	70
2013-07-06	23:00:00																											249.68	0.12	0.264175	904.78	27.3182	3.8	2.25	70
2013-07-07	03:00:00																											235.5	0.21	0.261925	904.7	27.3111	3.86	1.23	64
2013-07-07	07:00:00																											209.6	0.13	0.259125	902.79	27.2762	3.9	1.66	64
2013-07-07	11:00:00																											268.07	0.03	0.2563	903.48	27.2621	3.89	2.1	64
2013-07-07	15:00:00																											207.32	0.04	0.254725	904.62	27.2927	3.91	1.97	64
2013-07-07	19:00:00																											135.65	0.02	0.253075	903.82	27.306	3.91	2.21	64
2013-07-07	23:00:00																											194.08	0.1	0.260125	904.57		3.84	1.48	64
2013-07-08	03:00:00																											230.5	0.21	0.25935	904.95	27.2902	3.91	0.34	38
2013-07-08	07:00:00																											279.97	0.08	0.25515	902.96	27.2672	4	0.96	38
2013-07-08	11:00:00																											152.13	0.05	0.256825	903.24	27.2814	3.89	1.31	38
2013-07-08	15:00:00																											241.15	0.05	0.257875	904.68	27.2836	3.96	1.25	38
2013-07-08	19:00:00																											234.02	0.04	0.2566	903.91	27.3016	3.96	1.54	38
2013-07-08	23:00:00																											201.39	0.08	0.26285	904.32	27.3145	3.81	1.25	38
2013-07-09	03:00:00																											229.47	0.16	0.2628	905.07	27.2999	3.93	0.47	62
2013-07-09	07:00:00																											219.92	0.05	0.254825	903.2	27.2704	4.08	1.37	62
2013-07-09	11:00:00																											202.55	0.05	0.2571	903.03	27.2812	3.9	1.91	62
2013-07-09	15:00:00																											161.31	0.05	0.26105	904.68	27.308	3.83	1.74	62
2013-07-09	19:00:00																											225.18	0.04	0.258225	904.02	27.2978	3.96	2.18	62
2013-07-09	23:00:00																											229.1	0.03	0.26	904.07	27.3085	3.85	2.09	62
2013-07-10	03:00:00																											232.3	0.17	0.2652	905.1	27.2973	3.83	0.55	68
2013-07-10	07:00:00																											184.81	0.11	0.2596	903.5	27.2697	4.03	1.1	68
2013-07-10	11:00:00																											289.81	0.05	0.257425	902.88	27.2666	3.89	2.02	68
2013-07-10	15:00:00																											235.6	0.08	0.25875	904.61	27.3046	3.89	1.4	68
2013-07-10	19:00:00																											249.86	0.16	0.262625	904.18	27.2956	3.92	0.86	68
2013-07-10	23:00:00																											130.14	0.03	0.258	903.83	27.2807	3.87	2.29	68
2013-07-11	03:00:00																											239.97	0.13	0.26035	905	27.2868	3.92	1.16	31
2013-07-11	07:00:00																											252.37	0.12	0.258125	903.81	27.2843	4.08	1.68	31
2013-07-11	11:00:00																											179	0.07	0.256825	902.8	27.2655	3.95	2.89	31
2013-07-11	15:00:00																											234.11	0.09	0.2611	904.47	27.2973	3.9	1.89	31
2013-07-11	19:00:00																											252.24	0.15	0.259	904.37	27.2921	4.02	1.33	31
2013-07-11	23:00:00																											295.37	0.03	0.258	903.64	27.2828	3.91	3.46	31
2013-07-12	03:00:00																											249.59	0.13	0.261025	904.78	27.287	3.91	1.59	26
2013-07-12	07:00:00																											229.8	0.17	0.2614	904.1	27.2526	4.04	1.17	26
2013-07-12	11:00:00																											214.52	0.05	0.257675	902.81	27.2633	4.01	3.37	26
2013-07-12	15:00:00																											195.09	0.07	0.25905	904.29	27.289	3.9	2.5	26
2013-07-12	19:00:00																											237.91	0.17	0.2603	904.56	27.2775	4.04	0.85	26
2013-07-12	23:00:00																											234.51	0.03	0.2567	903.54		4	3.24	26
2013-07-13	03:00:00																											254.26	0.09	0.257225	904.45		4	2.17	39
2013-07-13	07:00:00																											238.03	0.14	0.261625	904.3		4.16	0.98	39
2013-07-13	11:00:00																											339.8	0.07	0.256775	902.95		4.06	3.47	39
2013-07-13	15:00:00																											170.57	0.04	0.256575	904.11		4.01	2.87	39
2013-07-13	19:00:00																											233.27	0.19	0.2624	904.75		4.07	0.41	39
2013-07-13	23:00:00																											227.03	0.09	0.26005	903.55		4.03	0.36	39
2013-07-14	03:00:00																											217.83	0.06	0.255925	904.09		4	0.25	54
2013-07-14	07:00:00																											236.33	0.14	0.26245	904.45		4.12	0.2	54
2013-07-14	11:00:00																											160.91	0.05	0.25875	903.18		4.06	0.25	54
2013-07-14	15:00:00																											128.29	0.08	0.25995	903.93		3.93	0.55	54
2013-07-14	19:00:00																											236.71	0.19	0.26245	904.9	27.2635	4.03	0.24	54
2013-07-14	23:00:00																											260.87	0.05	0.257575	903.7	27.2477	4.05	0.99	54
2013-07-15	03:00:00																											256.85	0.07	0.25795	903.71	27.2704	3.93	0.44	48
2013-07-15	07:00:00																											232.75	0.15	0.2622	904.44	27.2329	4.1	0.38	48
2013-07-15	11:00:00																											244.7	0.08	0.2575	903.5	27.2473	4.06	0.25	48
2013-07-15	15:00:00																											266.3	0.06	0.2569	903.76	27.2694	3.97	0.28	48
2013-07-15	19:00:00																											232.17	0.13	0.26085	904.98	27.2642	4.1	0.28	48
2013-07-15	23:00:00																											169.57	0.06	0.256725	903.99	27.2701	4.03	0.37	48
2013-07-16	03:00:00																											177.18	0.04	0.257925	903.37	27.257	3.94	0.41	11
2013-07-16	07:00:00																											225.56	0.13	0.260475	904.28	27.2421	4.07	0.36	11
2013-07-16	11:00:00																													0.25795	903.83	27.2397			11
2013-07-16	15:00:00																											221.24	0.04	0.2572	903.71	27.2728	3.96	0.52	11
2013-07-16	19:00:00																											231.26	0.12	0.25965	904.97	27.2691	4	0.4	11
2013-07-16	23:00:00																											132.02	0.06	0.256975	904.38	27.266	4.08	0.53	11
2013-07-17	03:00:00																											233.42	0.04	0.256825	903.17	27.2633	3.99	0.6	5
2013-07-17	07:00:00																											235.83	0.17	0.2608	903.97	27.2373	4.03	0.36	5
2013-07-17	11:00:00																											290.09	0.08	0.26035	904.15	27.2315	4.12	0.62	5
2013-07-17	15:00:00																											153.15	0.06	0.256875	903.7	27.2697	3.98	1.76	5
2013-07-17	19:00:00																											235.3	0.1	0.256575	904.82	27.2682	4.04	0.57	5
2013-07-17	23:00:00																											246.4	0.15	0.260925	904.8	27.2742	4.06	0.46	5
2013-07-18	03:00:00																											236.84	0.09	0.262575	903.1	27.2479	4.05	1.07	37
2013-07-18	07:00:00																											250	0.04	0.261725	903.5	27.2118	4.1	1.72	37
2013-07-18	11:00:00																											181.49	0.04	0.2656	904.35	27.242	4.19	1.83	37
2013-07-18	15:00:00																											156.92	0.05	0.2582	903.79	27.2622	3.99	2.18	37
2013-07-18	19:00:00																											231.64	0.06	0.2575	904.54	27.2452	4.08	1.5	37
2013-07-18	23:00:00																											236.07	0.15	0.264	905.15	27.2467	4.14	0.79	37
2013-07-19	03:00:00																											244.42	0.16	0.266075	903.28	27.2251	4.13	0.71	65
2013-07-19	07:00:00																											214.33	0.03	0.262625	902.98	27.1981	4.15	2.18	65
2013-07-19	11:00:00																											240.32	0.04	0.2608	904.39	27.2476	4.15	1.84	65
2013-07-19	15:00:00																											258.98	0.07	0.2615	903.99	27.2616	4.03	1.7	65
2013-07-19	19:00:00																											239.8	0.08	0.261475	904.19	27.2297	4.08	1.57	65
2013-07-19	23:00:00																											237.2	0.16	0.2628	905.38	27.2455	4.13	0.63	65
2013-07-20	03:00:00																											248.56	0.12	0.266375	903.7	27.2028	4.18	0.7	53
2013-07-20	07:00:00																											217.12	0.05	0.258825	902.52	27.2057	4.1	1.24	53
2013-07-20	11:00:00																											228.62	0.08	0.259125	904.23	27.2636	4.11	0.98	53
2013-07-20	15:00:00																											245.18	0.18	0.26325	904.27	27.2784	3.99	0.44	53
2013-07-20	19:00:00																											224.28	0.08	0.26255	903.83	27.2356	4.01	1.29	53
2013-07-20	23:00:00																											222.22	0.03	0.260175	905.34	27.2431	4.05	2.13	53
2013-07-21	03:00:00																											250.34	0.1	0.260575	904.27	27.2645	4.05	1.37	51
2013-07-21	07:00:00																											221.42	0.02	0.2573	902.29	27.2467	4.02	2.43	51
2013-07-21	11:00:00																											212.58	0.03	0.25795	903.89	27.2385	3.99	2.7	51
2013-07-21	15:00:00																											230.23	0.15	0.259375	904.61	27.2605	4	0.81	51
2013-07-21	19:00:00																											236.34	0.11	0.26005	903.61	27.2506	3.97	0.79	51
2013-07-21	23:00:00																											252.48	0.06	0.25675	905.09	27.242	4.02	1.51	51
2013-07-22	03:00:00																											232.23	0.18	0.256825	904.89	27.236	4.07	0.4	37
2013-07-22	07:00:00																											307.5	0.06	0.256525	902.36	27.2594	4.05	0.58	37
2013-07-22	11:00:00																											283.43	0.04	0.2553	903.49	27.2525	4	0.73	37
2013-07-22	15:00:00																											233.03	0.12	0.256975	904.91	27.2709	4.01	0.54	37
2013-07-22	19:00:00																											202.3	0.06	0.256825	903.59	27.2713	3.98	1.62	37
2013-07-22	23:00:00																											213.62	0.04	0.254125	904.61	27.2605	3.96	1.69	37
2013-07-23	03:00:00																											243.21	0.16	0.257975	905.32	27.266	4	0.57	59
2013-07-23	07:00:00																											289.66	0.1	0.257	902.68	27.2698	4	1.22	59
2013-07-23	11:00:00																											302.4	0.03	0.25275	903.03	27.2411	3.96	2.04	59
2013-07-23	15:00:00																											246.74	0.07	0.254325	905.04	27.2592	4.02	1.33	59
2013-07-23	19:00:00																											138.58	0.08	0.254275	903.73	27.2697	3.97	1.58	59
2013-07-23	23:00:00																											256.28	0.04	0.253925	904.04	27.2705	3.9	2.06	59
2013-07-24	03:00:00																											237.23	0.2	0.255425	905.46	27.2738	3.97	0.44	54
2013-07-24	07:00:00																											277.86	0.07	0.2539	903.19	27.2738	3.98	1.37	54
2013-07-24	11:00:00																											251.27	0.04	0.250825	902.7	27.2361	3.96	1.8	54
2013-07-24	15:00:00																											239.54	0.09	0.25455	905	27.2472	4.08	1	54
2013-07-24	19:00:00																											249.52	0.06	0.252375	904.06	27.272	4	2.17	54
2013-07-24	23:00:00																											131.86	0.04	0.25255	903.53	27.2708	3.9	2.09	54
2013-07-25	03:00:00																											241.44	0.18	0.25625	905.26	27.2699	3.96	0.8	63
2013-07-25	07:00:00																											247.56	0.19	0.257875	903.76	27.2648	4.01	0.63	63
2013-07-25	11:00:00																											253.48	0.05	0.25015	902.59	27.2389	3.95	1.66	63
2013-07-25	15:00:00																											241.52	0.06	0.25275	904.82	27.2518	4	1.39	63
2013-07-25	19:00:00																											203.27	0.06	0.257175	904.45	27.2745	4.07	2.06	63
2013-07-25	23:00:00																											116.29	0.05	0.25415	903.25	27.2751	3.94	2.62	63
2013-07-26	03:00:00																											235.48	0.2	0.256825	904.84	27.2721	3.97	1.14	96
2013-07-26	07:00:00																											234.9	0.19	0.26025	904.24	27.2509	4.06	0.63	96
2013-07-26	11:00:00																											222.48	0.05	0.25635	902.7	27.2337	4.01	2.08	96
2013-07-26	15:00:00																											236.38	0.08	0.25505	904.52	27.2551	4	1.51	96
2013-07-26	19:00:00																											290.53	0.11	0.259425	904.8	27.2651	4.08	1.37	96
2013-07-26	23:00:00																											107.42	0.04	0.255575	903.22	27.2512	3.99	2.32	96
2013-07-27	03:00:00																											237.47	0.15	0.25915	904.31	27.239	4.06	0.86	61
2013-07-27	07:00:00																											263.65	0.12	0.263525	904.52	27.2354	4.17	1.46	61
2013-07-27	11:00:00																											291.58	0.04	0.2554	902.98	27.2241	4.03	2.62	61
2013-07-27	15:00:00																											232.33	0.1	0.2586	904.22	27.2608	4.08	1.69	61
2013-07-27	19:00:00																											188.87	0.11	0.264275	905	27.2543	4.16	1.62	61
2013-07-27	23:00:00																											139.22	0.03	0.257775	903.38	27.2408	4.08	3.36	61
2013-07-28	03:00:00																											235.55	0.07	0.257025	903.79	27.2344	4.1	2.04	28
2013-07-28	07:00:00																											188.18	0.08	0.26915	904.54	27.2173	4.2	1.82	28
2013-07-28	11:00:00																											97.84	0.04	0.261175	903.33	27.2397	4.11	3.68	28
2013-07-28	15:00:00																											231.58	0.08	0.257025	903.96	27.2623	4.04	2.2	28
2013-07-28	19:00:00																											238.28	0.13	0.265875	905.06	27.257	4.14	1.12	28
2013-07-28	23:00:00																											189.55	0.06	0.25985	903.71	27.2282	4.08	2.86	28
2013-07-29	03:00:00																											204.47	0.07	0.2554	903.42	27.2421	4.03	2.38	17
2013-07-29	07:00:00																											217.1	0.07	0.262975	904.39	27.2307	4.16	2.24	17
2013-07-29	11:00:00																											214.62	0.04	0.25365	903.73	27.2546	4.04	3.2	17
2013-07-29	15:00:00																											186.39	0.06	0.254925	903.86	27.2587	3.98	2.63	17
2013-07-29	19:00:00																											243.72	0.11	0.2622	905.01	27.2377	4.12	1.61	17
2013-07-29	23:00:00																											269.25	0.03	0.2539	904.13	27.2497	4.06	4.12	17
2013-07-30	03:00:00																											186.08	0.02	0.2509	903.25	27.2407	4.03	3.41	15
2013-07-30	07:00:00																											216.24	0.03	0.24885	904.13	27.2295	4.08	3.66	15
2013-07-30	11:00:00																											271.82	0.03	0.252925	904.06	27.2656	4.01	3.55	15
2013-07-30	15:00:00																											254.16	0.06	0.253325			3.99	3.1	15
2013-07-30	19:00:00																											233.89	0.14	0.260725	904.8	27.2476	4.03	1.31	15
2013-07-30	23:00:00																											277.99	0.08	0.26055	904.48	27.254	4.07	3.02	15
2013-07-31	03:00:00																											301.66	0.03	0.25395	903.23	27.2562	4.02	3.73	20
2013-07-31	07:00:00																											247.92	0.05	0.25445	903.77	27.2457	4.06	3.35	20
2013-07-31	11:00:00																											215.24	0.03	0.25385	904.25	27.2566	4.03	3.94	20
2013-07-31	15:00:00																											264.02	0.04	0.252325	903.86	27.2623	3.96	3.15	20
2013-07-31	19:00:00																											234.17	0.2	0.2588	904.58	27.2472	3.98	0.64	20
2013-07-31	23:00:00																											194.2	0.11	0.257025	904.76	27.2364	4.06	1.57	20
2013-08-01	03:00:00																											237.07	0.03	0.252575	903.35	27.2362	4.05	3.2	20
2013-08-01	07:00:00																											215.31	0.04	0.2555	903.41	27.2301	4.08	2.92	20
2013-08-01	11:00:00																											266.9	0.05	0.259625	904.31	27.2493	4.08	3.11	20
2013-08-01	15:00:00																											314.05	0.02	0.252825	903.97	27.2761	4	4.66	20
2013-08-01	19:00:00																											224.75	0.16	0.255975	904.33	27.2602	3.98	2.48	20
2013-08-01	23:00:00																											212.06	0.11	0.259875	904.93	27.2514	4.04	2.71	20
2013-08-02	03:00:00																											270.93	0.06	0.2603	903.57	27.2379	4.07	3.17	10
2013-08-02	07:00:00																											220.54	0.06	0.25555	903.1	27.2342	4.11	1.74	10
2013-08-02	11:00:00																											117.64	0.03	0.260675	904.28	27.2447	4.12	2.74	10
2013-08-02	15:00:00																											211.84	0.02	0.255025	904.13	27.2771	3.97	3.16	10
2013-08-02	19:00:00																											227.21	0.12	0.2556	904.11	27.2528	4.04	1.71	10
2013-08-02	23:00:00																											243.95	0.16	0.262225	905	27.2349	4.1	1.29	10
2013-08-03	03:00:00																											59.51	0.04	0.257725	903.88	27.2603	4.11	1.78	22
2013-08-03	07:00:00																											185.85	0.03	0.256925	902.9	27.2237	4.13	2.25	22
2013-08-03	11:00:00																											197.24	0.03	0.254375	904.14	27.2517	4.09	2.6	22
2013-08-03	15:00:00																											199.66	0.1	0.2563	904.28	27.2668	3.99	1.6	22
2013-08-03	19:00:00																											235.38	0.21	0.261175	903.91	27.2514	4.06	1.13	22
2013-08-03	23:00:00																											259.02	0.14	0.2665	904.95	27.2251	4.15	0.81	22
2013-08-04	03:00:00																											277	0.03	0.258575	904.19	27.2179	4.12	2.19	33
2013-08-04	07:00:00																											151.83	0.03	0.26015	902.78	27.2097	4.11	2.42	33
2013-08-04	11:00:00																											150.98	0.02	0.25525	903.95	27.2675	4.05	2.06	33
2013-08-04	15:00:00																											265.53	0.08	0.2597	904.43	27.2796	4.06	1.63	33
2013-08-04	19:00:00																											219.59	0.05	0.261675	903.76	27.2537	4.04	1.81	33
2013-08-04	23:00:00																											213.86	0.09	0.2628	904.81	27.2393	4.06	2.81	33
2013-08-05	03:00:00																											195.79	0.03	0.26105	904.52	27.2355	4.11	2.46	27
2013-08-05	07:00:00																											120.7	0.01	0.252625	902.78	27.2258	4.03	3.13	27
2013-08-05	11:00:00																											146.13	0.02	0.24785	903.74	27.2784	4	2.38	27
2013-08-05	15:00:00																											251.72	0.07	0.25565	904.59	27.2757	4.02	3	27
2013-08-05	19:00:00																											197.34	0.04	0.256125	903.69	27.2597	3.99	2.83	27
2013-08-05	23:00:00																											220.22	0.03	0.252625	904.61	27.2519	3.99	2.49	27
2013-08-06	03:00:00																											235.47	0.1	0.2588	904.79	27.246	4.08	1.96	27
2013-08-06	07:00:00																											185.24	0.04	0.25635	902.89	27.2281	4.02	3.5	27
2013-08-06	11:00:00																											260.2	0.04	0.256275	903.54	27.2707	3.94	2.39	27
2013-08-06	15:00:00																											233.13	0.08	0.256725	904.74	27.291	3.98	1.62	27
2013-08-06	19:00:00																											189.31	0.04	0.256475	903.7	27.285	3.94	1.7	27
2013-08-06	23:00:00																											159.14	0.04	0.25385	904.34	27.2724	3.9	1.53	27
2013-08-07	03:00:00																											233.8	0.2	0.25725	904.99	27.2649	3.98	0.39	25
2013-08-07	07:00:00																											259.44	0.12	0.2581	903.07	27.2395	4.04	0.71	25
2013-08-07	11:00:00																											230.69	0.03	0.254975	903.32	27.253	3.94	1.27	25
2013-08-07	15:00:00																											240.3	0.05	0.253125	904.81	27.2815	3.98	1.08	25
2013-08-07	19:00:00																											206.6	0.1	0.25575	903.76	27.2835	3.92	1.02	25
2013-08-07	23:00:00																											236	0.11	0.257225	904.01	27.2616	3.95	0.78	25
2013-08-08	03:00:00																											229.38	0.19	0.256075	905.04	27.2454	4.01	0.36	34
2013-08-08	07:00:00																											191.82	0.08	0.259425	903.33	27.2316	4.1	1.03	34
2013-08-08	11:00:00																											193.44	0.03	0.254675	903.13	27.2553	3.96	1.77	34
2013-08-08	15:00:00																											215.03	0.05	0.253725	904.84	27.2845	4.02	1.35	34
2013-08-08	19:00:00																											190.88	0.03	0.252675	903.91	27.2826	4.04	1.59	34
2013-08-08	23:00:00																											241.92	0.06	0.2557	903.69	27.2784	3.92	1.34	34
2013-08-09	03:00:00																											234.28	0.19	0.2593	904.99	27.2507	4	0.41	55
2013-08-09	07:00:00																											282.52	0.11	0.2591	903.63	27.2221	4.08	1.21	55
2013-08-09	11:00:00																											130.96	0.04	0.254425	903.01	27.2647	4	1.74	55
2013-08-09	15:00:00																											217.29	0.06	0.2554	904.81	27.286	4	1.67	55
2013-08-09	19:00:00																											211.27	0.06	0.2576	904.14	27.2813	3.96	1.59	55
2013-08-09	23:00:00																											242.79	0.09	0.25825	903.43	27.258	3.93	1.64	55
2013-08-10	03:00:00																											210.32	0.07	0.259575	904.81	27.2372	4.07	1.75	22
2013-08-10	07:00:00																											237.37	0.05	0.260975	903.96	27.2312	4.12	1.91	22
2013-08-10	11:00:00																											54.55	0.03	0.254775	903	27.27	4	2.94	22
2013-08-10	15:00:00																											189.96	0.06	0.254575	904.7	27.2794	3.99	2.02	22
2013-08-10	19:00:00																											205.63	0.05	0.258575	904.39	27.2708	4.05	1.85	22
2013-08-10	23:00:00																											138.17	0.04	0.2559	903.23	27.2568	4.01	2.03	22
2013-08-11	03:00:00																											204.9	0.04	0.25585	904.49	27.2426	4	1.69	12
2013-08-11	07:00:00																											99.85	0.03	0.25835	904.22	27.2353	4.13	1.86	12
2013-08-11	11:00:00																											117.25	0.04	0.255725	903.07	27.2654	4.01	2.05	12
2013-08-11	15:00:00																											210.13	0.13	0.256125	904.54	27.2665	3.94	1.31	12
2013-08-11	19:00:00																											262.1	0.11	0.257125	904.67	27.2392	4.03	1.45	12
2013-08-11	23:00:00																											174.74	0.04	0.25595	903.23	27.2389	4.04	1.73	12
2013-08-12	03:00:00																											175.74	0.03	0.252	904.12	27.2414	4	1.65	8
2013-08-12	07:00:00																											146.3	0.04	0.257975	904.43	27.2478	4.1	1.59	8
2013-08-12	11:00:00																											121.19	0.03	0.255625	903.26	27.2582	4.07	1.91	8
2013-08-12	15:00:00																											165.24	0.07	0.254075	904.34	27.2672	3.99	1.77	8
2013-08-12	19:00:00																											232.73	0.12	0.2597	904.93	27.2471	4.07	1.49	8
2013-08-12	23:00:00																											101.61	0.02	0.2558	903.36	27.2326	4.06	1.93	8
2013-08-13	03:00:00																											146.35	0.04	0.252675	903.68	27.2704	4.02	2.1	-2
2013-08-13	07:00:00																											160.13	0.06	0.25695	904.45	27.2566	4.05	1.99	-2
2013-08-13	11:00:00																											81.97	0.03	0.252825	903.53	27.2748	4.01	2.27	-2
2013-08-13	15:00:00																											162.28	0.06	0.252925	904.12	27.2757	3.89	2.18	-2
2013-08-13	19:00:00																											242.15	0.14	0.256725	905.06	27.2608	4	1.76	-2
2013-08-13	23:00:00																											183.86	0.03	0.255275	903.66	27.2391	4.02	2.22	-2
2013-08-14	03:00:00																											215.08	0.03	0.253575	903.28	27.2523	3.98	2.46	-33
2013-08-14	07:00:00																											197	0.06	0.254775	904.31	27.2668	4.05	2.08	-33
2013-08-14	11:00:00																											141.04	0.05	0.251375	903.83	27.2735	3.97	2.23	-33
2013-08-14	15:00:00																											240.38	0.08	0.25275	903.94	27.2611	3.97	1.82	-33
2013-08-14	19:00:00																											236.83	0.16	0.255125	905.06	27.2576	4.01	1.4	-33
2013-08-14	23:00:00																											219.06	0.05	0.256025	904.07	27.2369	4.06	1.75	-33
2013-08-15	03:00:00																											109.69	0.04	0.25335	903.02	27.2452	3.99	1.84	-10
2013-08-15	07:00:00																											224.2	0.06	0.2507	904.02	27.2772	4	2.29	-10
2013-08-15	11:00:00																											157.32	0.05	0.251725	904.15	27.2843	3.95	1.81	-10
2013-08-15	15:00:00																											206.57	0.08	0.2549	903.83	27.273	3.87	1.64	-10
2013-08-15	19:00:00																											206	0.15	0.25525	904.94	27.2635	3.92	0.87	-10
2013-08-15	23:00:00																											205.15	0.12	0.25565	904.6	27.2514	3.99	0.94	-10
2013-08-16	03:00:00																											169.87	0.03	0.2523	902.99	27.2352	4.02	2.24	-12
2013-08-16	07:00:00																											178.05	0.04	0.250675	903.6	27.2606	3.92	2.38	-12
2013-08-16	11:00:00																											125.49	0.03	0.25	904.39	27.2863	3.94	2.46	-12
2013-08-16	15:00:00																											232.08	0.1	0.254	903.83	27.28	3.88	2.09	-12
2013-08-16	19:00:00																											192.18	0.1	0.254	904.62	27.2514	3.95	2.19	-12
2013-08-16	23:00:00																											120.99	0.03	0.2524	905.01	27.2399	4	2.42	-12
2013-08-17	03:00:00																											261.99	0.03	0.253925	903.15	27.2589	4.04	2.44	-3
2013-08-17	07:00:00																											159.58	0.05	0.251975	903.1	27.2711	3.98	2.06	-3
2013-08-17	11:00:00																											25.75	0.03	0.25095	904.48	27.2933	3.9	2.39	-3
2013-08-17	15:00:00																											187.95	0.05	0.253075	903.96	27.284	3.9	2.41	-3
2013-08-17	19:00:00																											176.31	0.07	0.2527	904.19	27.2757	3.9	2.43	-3
2013-08-17	23:00:00																											179.79	0.05	0.253825	905.26	27.2506	3.98	2.59	-3
2013-08-18	03:00:00																											184.54	0.05	0.25495	903.58	27.2568	4.07	2.79	-1
2013-08-18	07:00:00																											120.43	0.06	0.251625	902.69	27.2614	3.91	2.24	-1
2013-08-18	11:00:00																											165.71	0.03	0.249775	904.43	27.2967	3.88	1.56	-1
2013-08-18	15:00:00																											228.58	0.17	0.255775	904.23	27.2985	3.82	2.2	-1
2013-08-18	19:00:00																											231.23	0.04	0.25265	903.77	27.2624	3.9	1.89	-1
2013-08-18	23:00:00																											162.41	0.04	0.25175	905.27	27.2605	3.93	1.75	-1
2013-08-19	03:00:00																											219.31	0.09	0.25665	904.15	27.2865	4.06	2.2	16
2013-08-19	07:00:00																											24.02	0.07	0.251	902.44		3.98	1.34	16
2013-08-19	11:00:00																											121.26	0.03	0.2491	904.19	27.2899	3.92	1.7	16
2013-08-19	15:00:00																											239.8	0.13	0.254725	904.55	27.3004	3.85	1.74	16
2013-08-19	19:00:00																											187.3	0.08	0.25415	903.42	27.271	3.88	2.71	16
2013-08-19	23:00:00																											249.39	0.04	0.25225	904.96	27.2531	3.97	2.37	16
2013-08-20	03:00:00																											268.55	0.04	0.25335	904.69	27.2675	4.01	2.23	29
2013-08-20	07:00:00																											31.23	0.05	0.2491	902.45	27.2587	3.97	1.92	29
2013-08-20	11:00:00																											92.57	0.05	0.25105	903.85	27.2849	3.87	2.02	29
2013-08-20	15:00:00																											215.3	0.1	0.252425	904.88	27.3086	3.87	2.14	29
2013-08-20	19:00:00																											209.99	0.08	0.253	903.3	27.2707	3.84	2.52	29
2013-08-20	23:00:00																											112.65	0.04	0.2494	904.47	27.2611	3.91	2.81	29
2013-08-21	03:00:00																											215.31	0.12	0.2516	905.12	27.2676	3.98	2.4	26
2013-08-21	07:00:00																											148.07	0.06	0.251575	902.7	27.2252	4.02	2.29	26
2013-08-21	11:00:00																											38.61	0.05	0.252625	903.5	27.2879	3.87	2.2	26
2013-08-21	15:00:00																											239.73	0.11	0.2575	905.14	27.3223	3.83	2.6	26
2013-08-21	19:00:00																											179.33	0.11	0.25975	903.42	27.2973	3.8	2.54	26
2013-08-21	23:00:00																											126.72	0.02	0.2563	903.89	27.2768	3.8	3.11	26
2013-08-22	03:00:00																											259.95	0.05	0.25245	905.29	27.2774	3.96	3.67	16
2013-08-22	07:00:00																											264.02	0.11	0.257475	903.14	27.2919	3.83	2.92	16
2013-08-22	11:00:00																											238.15	0.04	0.257	903.18	27.2782	3.79	3.07	16
2013-08-22	15:00:00																											189.54	0.07	0.257975	905.22	27.3137	3.83	3.41	16
2013-08-22	19:00:00																											233.86	0.12	0.2661	903.72	27.3126	3.75	3.19	16
2013-08-22	23:00:00																											274.97	0.03	0.256375	903.4	27.2729	3.8	3.87	16
2013-08-23	03:00:00																											225.34	0.13	0.2538	905.17	27.278	3.91	3.18	-22
2013-08-23	07:00:00																											183.02	0.11	0.253325	903.65	27.2844	3.95	2.31	-22
2013-08-23	11:00:00																											114.47	0.05	0.2531	903.04	27.266	3.87	2.37	-22
2013-08-23	15:00:00																											229.38	0.07	0.255775	905.14	27.3043	3.88	2.79	-22
2013-08-23	19:00:00																											222.32	0.1	0.257775	904.13	27.3	3.85	2.57	-22
2013-08-23	23:00:00																											153.57	0.04	0.25335	903.08	27.2631	3.88	2.62	-22
2013-08-24	03:00:00																											242.2	0.1	0.25305	904.83	27.2543	3.94	2.5	-22
2013-08-24	07:00:00																											202.89	0.06	0.25285	904.1	27.281	4.01	2.66	-1
2013-08-24	11:00:00																											237.41	0.06	0.250175	903.06	27.2464	3.96	2.56	-1
2013-08-24	15:00:00																											176.94	0.1	0.2532	904.93	27.2834	3.95	2.62	-1
2013-08-24	19:00:00																											235.73	0.13	0.25425	904.5	27.2614	4	2.32	-1
2013-08-24	23:00:00																											190.19	0.05	0.2552	902.98	27.2162	4.05	2.69	-1
2013-08-25	03:00:00																											202.79	0.11	0.253575	904.38	27.2527	4.05	2.51	-10
2013-08-25	07:00:00																											218.74	0.13	0.26025	904.4	27.2253	4.1	2.62	-10
2013-08-25	11:00:00																											90.52	0.04	0.259325	903.21	27.2095	4.12	2.87	-10
2013-08-25	15:00:00																											148.8	0.09	0.256125	904.65	27.2601	4.07	2.77	-10
2013-08-25	19:00:00																											232.32	0.19	0.263425	904.78	27.2386	4.16	2.58	-10
2013-08-25	23:00:00																											275.12	0.07	0.2694	903.1	27.2015	4.21	2.97	-10
2013-08-26	03:00:00																											149.93	0.04	0.25765	903.92	27.2459	4.1	3.68	-76
2013-08-26	07:00:00																											120.85	0.07	0.26225	904.52	27.2738	4.06	3.45	-76
2013-08-26	11:00:00																											129.6	0.04	0.2552	903.47	27.2549	4	3.82	-76
2013-08-26	15:00:00																											189.9	0.05	0.25685	904.37	27.2629	4.02	3.65	-76
2013-08-26	19:00:00																											78.77	0.04	0.259625	904.94	27.2857	4.08	3.76	-76
2013-08-26	23:00:00																											95.14	0.05	0.254725	903.39	27.2736	3.98	3.82	-76
2013-08-27	03:00:00																											177.82	0.08	0.253625	903.53	27.2763	3.92	3.8	-21
2013-08-27	07:00:00																											207.01	0.07	0.2537	904.42	27.2758	3.93	3.11	-21
2013-08-27	11:00:00																											99.71	0.04	0.252275	903.75	27.268	3.89	2.84	-21
2013-08-27	15:00:00																											280.1	0.11	0.250825	904.16	27.2672	3.89	3.08	-21
2013-08-27	19:00:00																											238.01	0.2	0.252075	904.95	27.2701	3.93	2.49	-21
2013-08-27	23:00:00																											55.25	0.05	0.24965	903.74	27.245	3.94	3.03	-21
2013-08-28	03:00:00																											35.32	0.04	0.2433	903.28	27.2526	3.93	2.98	-44
2013-08-28	07:00:00																											232.72	0.13	0.2474	904.22	27.2862	3.95	2.92	-44
2013-08-28	11:00:00																											106.97	0.03	0.246	903.99	27.261	3.96	3.3	-44
2013-08-28	15:00:00																											53.37	0.03	0.244475	904	27.2465	3.92	3.3	-44
2013-08-28	19:00:00																											211.27	0.16	0.246425	904.84	27.2757	3.95	2.7	-44
2013-08-28	23:00:00																											267.26	0.1	0.248525	904.13	27.2543	3.98	3.05	-44
2013-08-29	03:00:00																											134.66	0.03	0.2423	903.2	27.2331	3.98	2.62	-110
2013-08-29	07:00:00																											102.64	0.05	0.241575	903.94	27.2587	3.97	3.27	-110
2013-08-29	11:00:00																											263.31	0.07	0.247675	904.21	27.2493	3.97	3.5	-110
2013-08-29	15:00:00																											246.03	0.03	0.2432	903.95	27.2401	3.95	3.82	-110
2013-08-29	19:00:00																											216.88	0.12	0.246825	904.65	27.2534	4.02	3.89	-110
2013-08-29	23:00:00																											136.82	0.05	0.247	904.45	27.2518	4.06	4.42	-110
2013-08-30	03:00:00																											206.16	0.03	0.243125	903.25	27.2232	4	4.09	-22
2013-08-30	07:00:00																											198.11	0.03	0.24305	903.64	27.2641	3.99	4.72	-22
2013-08-30	11:00:00																											213.98	0.04	0.24615	904.34	27.2704	3.97	4.61	-22
2013-08-30	15:00:00																											216.06	0.03	0.243925	903.97	27.2362	3.93	5.02	-22
2013-08-30	19:00:00																											223.21	0.07	0.244175	904.41	27.2386	4.01	5	-22
2013-08-30	23:00:00																											203.84	0.05	0.245475	904.69	27.2371	4.01	5.3	-22
2013-08-31	03:00:00																											143.61	0.04	0.242025	903.42	27.2385	4.03	5.77	1
2013-08-31	07:00:00																											193.64	0.06	0.24205	903.37	27.2582	3.99	5.46	1
2013-08-31	11:00:00																											9.8	0.05	0.241525	904.39	27.2642	3.96	5.68	1
2013-08-31	15:00:00																											180.62	0.04	0.242425	904.06	27.2666	3.92	5.79	1
2013-08-31	19:00:00																											225.52	0.09	0.24495	904.16	27.2616	3.96	5.48	1
2013-08-31	23:00:00																											165.4	0.05	0.245075	904.84	27.2767	4.02	5.6	1
2013-09-01	03:00:00																											269.06	0.09	0.23995	903.68	27.2608	4.02	5.58	-2
2013-09-01	07:00:00																											263.1	0.06	0.237425	903.13	27.2649	3.97	5.92	-2
2013-09-01	11:00:00																											221.66	0.1	0.2443	904.37	27.2594	3.91	3.43	-2
2013-09-01	15:00:00																											233.79	0.13	0.244025	904.18	27.2461	3.97	1.87	-2
2013-09-01	19:00:00	9	1	0	0	0	0	0	0	0	0	0	0	0	0	0	0	0	0	0	0	0	0	0	0	0	4	243.57	0.07	0.243475	903.89	27.2409	4.03	2.17	-2
2013-09-01	23:00:00	13	0	0	0	0	0	1	0	0	0	0	0	0	0	0	0	0	0	0	0	0	0	0	0	0	3	230.8	0.05	0.242375	904.87	27.2569	4	3.2	-2
2013-09-02	03:00:00	14	0	2	0	0	0	1	0	0	0	0	0	0	1	0	0	1	0	0	0	0	2	0	0	0	2	184.62	0.04	0.241925	903.98	27.2439	4.04	3.44	-9
2013-09-02	07:00:00	16	0	0	0	0	3	3	0	0	0	0	0	0	0	0	0	3	0	0	0	0	1	0	0	0	2	98.83	0.04	0.242075	902.98	27.2754	4	3.05	-9
2013-09-02	11:00:00	13	0	0	0	0	0	0	0	0	0	0	0	0	0	0	0	1	0	0	0	0	0	0	0	0	3	162.03	0.04	0.2414	904.29	27.3019	3.95	3.07	-9
2013-09-02	15:00:00	14	0	0	0	0	0	1	0	0	0	0	0	0	0	0	1	0	0	0	0	0	1	0	0	0	3	226.87	0.11	0.243675	904.35	27.2941	3.94	3.38	-9
2013-09-02	19:00:00	13	0	0	0	0	0	2	0	0	0	0	0	0	0	0	0	0	0	0	0	0	0	0	0	0	2	188.21	0.05	0.240525	903.66	27.2778	3.93	3.3	-9
2013-09-02	23:00:00	13	0	0	0	0	0	0	0	0	0	0	0	0	0	0	0	0	0	0	0	0	0	0	0	0	6	231.06	0.14	0.2437	904.78	27.2812	3.99	2.26	-9
2013-09-03	03:00:00	11	0	1	0	0	0	0	0	0	0	0	0	0	0	0	0	0	0	0	0	0	0	0	0	0	1	257.23	0.06	0.2434	904.29	27.2631	4.03	2.76	-6
2013-09-03	07:00:00	12	0	1	0	0	0	0	0	0	0	0	0	1	0	0	0	0	0	0	0	0	0	0	0	0	0	67.52	0.03	0.239525	902.89	27.2542	3.95	3.07	-6
2013-09-03	11:00:00	13	0	0	0	1	0	0	0	0	0	0	0	0	0	0	0	1	0	0	0	0	1	0	0	0	2	294.82	0.06	0.239375	904.15	27.2799	3.93	3.69	-6
2013-09-03	15:00:00	12	0	0	0	0	0	1	0	0	0	0	0	0	0	0	1	0	0	0	0	0	1	0	0	0	0	233.22	0.2	0.242675	904.52		3.95	1.32	-6
2013-09-03	19:00:00	14	0	0	0	0	0	0	0	0	0	0	0	0	0	0	2	0	0	0	0	0	0	0	0	0	4	175.69	0.06	0.242275	903.45		4.03	3.31	-6
2013-09-03	23:00:00	13	0	0	0	0	0	0	0	0	0	0	0	0	0	0	0	0	0	0	0	1	0	0	0	0	3	268.05	0.06	0.24045	904.56		4	2.86	-6
2013-09-04	03:00:00	13	0	0	0	0	0	0	0	0	0	0	0	0	0	0	0	0	0	0	0	1	0	0	0	0	1	228.37	0.15	0.24385	904.59		4.06	1.63	3
2013-09-04	07:00:00	12	0	0	0	0	0	0	0	0	0	0	0	0	0	0	0	1	0	0	0	1	0	0	0	0	2	170.4	0.04	0.241175	902.9		4.02	2.69	3
2013-09-04	11:00:00	12	1	0	0	0	0	0	0	0	0	0	0	0	0	0	1	0	0	1	0	0	1	0	0	0	1	150.6	0.03	0.239925	903.95		3.93	2.48	3
2013-09-04	15:00:00	12	1	0	0	1	0	0	0	0	0	0	0	0	1	0	0	0	0	0	0	0	1	0	1	0	4	234.54	0.17	0.242975	904.7		3.95	2.17	3
2013-09-04	19:00:00	11	0	0	0	0	0	0	0	0	0	0	0	1	0	0	0	0	0	0	0	1	0	0	0	0	4	196.24	0.1	0.242575	903.36		3.98	2.19	3
2013-09-04	23:00:00	16	1	0	0	0	0	0	0	0	0	0	0	0	0	0	1	0	0	0	0	0	0	0	0	0	6	180.8	0.03	0.238125	904.26		3.91	3.13	3
2013-09-05	03:00:00	15	1	0	0	0	0	0	0	0	0	0	0	0	0	0	0	0	0	0	1	0	0	0	0	0	1	236.74	0.17	0.24245	904.83		3.97	1.92	45
2013-09-05	07:00:00	11	0	0	0	1	0	0	0	0	0	0	0	0	1	0	0	0	0	0	0	0	1	0	0	0	1	163.85	0.09	0.242525	903.03		4	2.22	45
2013-09-05	11:00:00	10	0	3	0	0	0	0	0	0	0	0	0	0	0	0	4	0	0	0	1	0	0	0	0	0	5	111.82	0.07	0.2423	903.77		3.87	2.86	45
2013-09-05	15:00:00	12	1	1	0	0	1	0	0	0	0	0	0	0	0	0	0	0	0	0	1	1	1	1	0	0	12	238.76	0.2	0.243925	904.9		3.98	1.8	45
2013-09-05	19:00:00	15	1	1	0	0	0	0	0	0	0	0	0	0	0	0	0	0	0	0	0	0	0	0	0	0	4	258.5	0.04	0.241025	903.38		3.95	3.31	45
2013-09-05	23:00:00	14	0	0	0	0	0	0	0	0	0	1	0	0	0	0	2	0	0	0	0	0	0	0	0	0	10	301.44	0.04	0.241175	903.93		3.91	3.64	45
2013-09-06	03:00:00	15	1	0	0	0	0	0	0	0	0	0	0	0	0	0	1	0	0	0	0	0	1	0	0	0	0	234.21	0.22	0.24285	904.99		3.94	1	11
2013-09-06	07:00:00	16	0	0	0	0	0	0	0	0	0	0	0	0	0	0	0	1	0	0	0	0	0	0	0	0	2	127.1	0.11	0.24185	903.27		3.95	2.12	11
2013-09-06	11:00:00	8	0	0	0	0	0	0	0	0	0	0	0	0	0	0	0	0	0	0	0	0	0	0	0	0	1	72.81	0.05	0.2409	903.59		3.89	2.11	11
2013-09-06	15:00:00																											231.25	0.18	0.2414	905.03		3.93	1.19	11
2013-09-06	19:00:00																											247.93	0.18	0.241875	903.51		3.94	1.26	11
2013-09-06	23:00:00																											301.24	0.06	0.24165	903.54	27.2399	3.96	2.44	11
2013-09-07	03:00:00																											227.09	0.17	0.2442	905	27.2843	4	1.45	7
2013-09-07	07:00:00																											222.96	0.15	0.244175	903.58	27.2712	4	1.24	7
2013-09-07	11:00:00																											221.23	0.04	0.241975	903.44	27.2326	3.97	2.52	7
2013-09-07	15:00:00																											219.56	0.1	0.2412	905.12	27.2647	3.98	1.82	7
2013-09-07	19:00:00																											236.93	0.18	0.2454	903.77	27.2544	4.08	1.23	7
2013-09-07	23:00:00																											111.95	0.04	0.242975	903.2	27.2172	4.04	2.94	7
2013-09-08	03:00:00																											212.89	0.11	0.2434	904.85	27.2613	4.04	1.94	20
2013-09-08	07:00:00																											226.77	0.1	0.248275	903.89	27.2701	4.13	2.37	20
2013-09-08	11:00:00																											67.74	0.09	0.245	903.32	27.262	3.97	2.77	20
2013-09-08	15:00:00																											212.04	0.09	0.24545	905.05	27.2863	3.93	3.03	20
2013-09-08	19:00:00																											224.55	0.13	0.2465	904.08	27.2705	4	3.06	20
2013-09-08	23:00:00																											36.1	0.07	0.244825	902.94	27.2467	3.98	2.98	20
2013-09-09	03:00:00																											194.81	0.08	0.244725	904.52	27.2705	3.91	3	28
2013-09-09	07:00:00																											235.01	0.19	0.245275	904.19	27.2607	3.96	2.88	28
2013-09-09	11:00:00																											104.21	0.07	0.243975	903.32	27.2326	3.96	3.22	28
2013-09-09	15:00:00																											230.41	0.07	0.2448	904.92	27.2769	3.93	3.48	28
2013-09-09	19:00:00																											193.62	0.13	0.244775	904.46	27.2707	4.06	3.27	28
2013-09-09	23:00:00																											71.27	0.06	0.24425	902.87	27.2438	4.02	3.65	28
2013-09-10	03:00:00																											178.81	0.05	0.24725	904.12	27.2901	3.87	2.41	11
2013-09-10	07:00:00																											242.98	0.15	0.249175	904.43	27.3014	3.92	3.11	11
2013-09-10	11:00:00																											263.81	0.04	0.247125	903.44	27.2742	3.88	3.07	11
2013-09-10	15:00:00																											224.78	0.05	0.2479	904.7	27.2809	3.84	4	11
2013-09-10	19:00:00																											233.15	0.19	0.24585	904.82	27.2725	3.94	3.86	11
2013-09-10	23:00:00																											262.61	0.1	0.243625	903.04	27.2481	3.99	4.06	11
2013-09-11	03:00:00																											94.1	0.08	0.241225	903.68	27.2407	3.96	3.12	-13
2013-09-11	07:00:00																											255.84	0.11	0.2432	904.53	27.2745	3.99	4.07	-13
2013-09-11	11:00:00																											335.43	0.04	0.2424	903.65	27.25	3.98		-13
2013-09-11	15:00:00																											202.27	0.04	0.242	904.43	27.2772	3.96	6.16	-13
2013-09-11	19:00:00																											233.99	0.16	0.24675	905.05	27.3012	3.89	3.76	-13
2013-09-11	23:00:00																											200.46	0.13	0.24495	903.37	27.2455	3.99	4.38	-13
2013-09-12	03:00:00																											122.18	0.04	0.24275	903.27	27.2422	4.03	4.33	6
2013-09-12	07:00:00																											152.99	0.05	0.2421	904.44	27.2613	3.96	4.7	6
2013-09-12	11:00:00																											152.21	0.05	0.2422	903.93	27.2661	4	4.96	6
2013-09-12	15:00:00																											112.28	0.07	0.240975	904.12	27.2676	3.99	4.9	6
2013-09-12	19:00:00																											224.16	0.24	0.244575	905.07	27.2769	4	3.81	6
2013-09-12	23:00:00																											196.81	0.1	0.247325	903.83	27.2205	4.11	3.79	6
2013-09-13	03:00:00																											71.02	0.04	0.245375	902.98	27.236	4.12	4.29	12
2013-09-13	07:00:00																											127.02	0.06	0.242	904.16	27.2835	4.01	4.36	12
2013-09-13	11:00:00																											209.52	0.13	0.24745	904.22	27.2614	3.96	2.98	12
2013-09-13	15:00:00																											142.7	0.04	0.245675	903.88	27.2359	4.07	3.48	12
2013-09-13	19:00:00																											214.49	0.15	0.247325	904.87	27.2467	4.07	3.25	12
2013-09-13	23:00:00																											225.25	0.18	0.25735	904.35	27.1977	4.19	3.03	12
2013-09-14	03:00:00																											103.5	0.08	0.271575	902.9	27.1767	4.3	2.62	13
2013-09-14	07:00:00																											74.74	0.08	0.24845	903.76	27.2606	4.06	3.23	13
2013-09-14	11:00:00																											131.69	0.06	0.2437	904.48	27.2839	4.01	3.65	13
2013-09-14	15:00:00																											203.98	0.12	0.249625	903.79	27.2399	4.01	3.09	13
2013-09-14	19:00:00																											139.65	0.04	0.249975	904.51	27.2434	4.06	3.34	13
2013-09-14	23:00:00																											206.46	0.03	0.24885	904.8	27.2621	4.07	3.78	13
2013-09-15	03:00:00																											215.88	0.03	0.2484	903.09	27.2461	4.09	4.17	15
2013-09-15	07:00:00																											92.29	0.05	0.24505	903.33	27.2491	4	3.54	15
2013-09-15	11:00:00																											224.21	0.19	0.246275	904.65	27.2742	3.98	3.28	15
2013-09-15	15:00:00																											209.09	0.07	0.2506	903.87	27.2501	4.07	2.94	15
2013-09-15	19:00:00																											97.6	0.04	0.24415	904.06	27.2481	3.97	3.07	15
2013-09-15	23:00:00																											226.31	0.15	0.245475	905.07	27.2621	3.98	2.84	15
2013-09-16	03:00:00																											173.29	0.13	0.252575	903.49	27.2231	4.11	2.5	8
2013-09-16	07:00:00																											137.88	0.05	0.24355	902.97	27.2291	4.03	1.49	8
2013-09-16	11:00:00																											216.62	0.1	0.245075	904.69	27.2601	3.97	1.19	8
2013-09-16	15:00:00																											225.58	0.17	0.248025	904.12	27.2551	4.01	0.89	8
2013-09-16	19:00:00																											98.28	0.05	0.24675	903.56	27.2289	4.05	1.59	8
2013-09-16	23:00:00																											210.89	0.11	0.245475	905.03	27.2508	3.98	1.08	8
2013-09-17	03:00:00																											208.8	0.07	0.251275	903.99	27.258	4.12	1.48	19
2013-09-17	07:00:00																											45.87	0.03	0.244025	902.73	27.2507	4.04	2	19
2013-09-17	11:00:00																											176.47	0.11	0.242675	904.54	27.2781	3.95	1.69	19
2013-09-17	15:00:00																											227.64	0.18	0.244725	904.43	27.2472	3.97	1.06	19
2013-09-17	19:00:00																											207.97	0.03	0.2434	903.17	27.2237	4.02	1.87	19
2013-09-17	23:00:00																											209.72	0.06	0.2412	904.76	27.2449	4.03	1.94	19
2013-09-18	03:00:00																											231.1	0.17	0.2475	904.5	27.2417	4.09	1.22	-23
2013-09-18	07:00:00																											195.52	0.03	0.245475	902.71	27.213	4.1	2.18	-23
2013-09-18	11:00:00																											124.36	0.03	0.23885	904.33	27.2662	4.03	2.28	-23
2013-09-18	15:00:00																											209.08	0.18	0.244125	904.82	27.2654	4.05	1.06	-23
2013-09-18	19:00:00																											201.8	0.05	0.246775	903.01	27.2232	4.12	1.93	-23
2013-09-18	23:00:00																											107.22	0.04	0.24215	904.29	27.2481	4.03	1.75	-23
2013-09-19	03:00:00																											205.9	0.06	0.2417	904.88	27.2555	4.04	1.73	-152
2013-09-19	07:00:00																											189.78	0.03	0.24535	902.88	27.2452	4.07	2.08	-152
2013-09-19	11:00:00																											142.18	0.06	0.241475	904.04	27.2786	3.96	2.24	-152
2013-09-19	15:00:00																											234.92	0.13	0.243175	905.13	27.2861	3.97	1.48	-152
2013-09-19	19:00:00																											158.03	0.07	0.242475	903.07	27.2463	4	1.57	-152
2013-09-19	23:00:00																											146.79	0.02	0.2402	903.76	27.271	3.94	2.31	-152
2013-09-20	03:00:00																											226.47	0.13	0.241525	905.07	27.2744	3.95	1.49	-15
2013-09-20	07:00:00																											117.52	0.08	0.241675	903.21	27.2318	4.01	1.61	-15
2013-09-20	11:00:00																											201.93	0.04	0.239525	903.74	27.2776	3.92	2	-15
2013-09-20	15:00:00																											229.87	0.19	0.240825	905.27	27.2755	3.95	0.93	-15
2013-09-20	19:00:00																											140.99	0.07	0.24125	903.29	27.2393	4.01	1.28	-15
2013-09-20	23:00:00																											138.9	0.04	0.239275	903.24	27.2564	3.93	1.63	-15
2013-09-21	03:00:00																											219.51	0.14	0.242925	905.01	27.2789	3.93	1.1	-14
2013-09-21	07:00:00																											188	0.06	0.241375	903.62	27.2505	4.01	1.84	-14
2013-09-21	11:00:00																											154.49	0.06	0.2387	903.54	27.2708	3.93	2.58	-14
2013-09-21	15:00:00																											225.93	0.16	0.242375	905.27	27.2827	3.89	1.11	-14
2013-09-21	19:00:00																											168.64	0.05	0.239675	903.68	27.2605	4	1.81	-14
2013-09-21	23:00:00																											126.75	0.04	0.24105	902.94	27.2701	3.93	1.97	-14
2013-09-22	03:00:00																											216.89	0.15	0.2457	904.79	27.2924	3.82	1.04	-99
2013-09-22	07:00:00																											165.12	0.06	0.24305	904.03	27.2564	3.93	1.55	-99
2013-09-22	11:00:00																											157.23	0.05	0.239125	903.47	27.2701	3.94	1.88	-99
2013-09-22	15:00:00																											217.27	0.13	0.242425	905.14	27.2857	3.9	1.17	-99
2013-09-22	19:00:00																											131.53	0.04	0.241075	904.08	27.2482	3.99	1.8	-99
2013-09-22	23:00:00																											155.17	0.03	0.238775	902.8	27.2574	3.96	1.89	-99
2013-09-23	03:00:00																											216.6	0.14	0.24075	904.44	27.2935	3.9	1.49	-14
2013-09-23	07:00:00																													0.23995					-14
2013-09-23	11:00:00																													0.23905					-14
2013-09-23	15:00:00																													0.2397	904.93	27.2813			-14
2013-09-23	19:00:00																											191.13	0.1	0.2407	904.42	27.2457	3.92	0.88	-14
2013-09-23	23:00:00																											58.5	0.05	0.239725	902.85	27.2491	3.99	1.23	-14
2013-09-24	03:00:00																											188.69	0.07	0.2384	904.03	27.2823	3.92	1.09	2
2013-09-24	07:00:00																											206.72	0.1	0.2413	904.45	27.274	3.93	0.89	2
2013-09-24	11:00:00																											140.11	0.04	0.238925	903.61	27.2597	3.97	1.28	2
2013-09-24	15:00:00																											220.24	0.17	0.2411	904.65	27.2849	3.96	0.74	2
2013-09-24	19:00:00																											218.69	0.08	0.2419	904.65	27.2547	4.03	1.05	2
2013-09-24	23:00:00																											55.58	0.02	0.238175	903.06	27.2525	4	1.43	2
2013-09-25	03:00:00																											146.31	0.07	0.23925	903.67	27.2868	3.9	1.43	37
2013-09-25	07:00:00																											220.05	0.15	0.240725	904.46	27.2565	3.98	0.94	37
2013-09-25	11:00:00																											129.48	0.03	0.23935	903.8	27.261	3.97	1.47	37
2013-09-25	15:00:00																											169.88	0.05	0.2393	904.4	27.2745	3.99	1.66	37
2013-09-25	19:00:00																											217.27	0.1	0.239775	904.77	27.283	3.96	1.12	37
2013-09-25	23:00:00																											106.75	0.04	0.23915	903.38	27.2522	3.99	1.5	37
2013-09-26	03:00:00																											123.79	0.02	0.2393	903.41	27.2778	3.86	2.83	2
2013-09-26	07:00:00																											226.92	0.12	0.241275	904.39	27.2918	3.86	1.3	2
2013-09-26	11:00:00																											139.1	0.07	0.239975	904.02	27.2687	3.95	1.37	2
2013-09-26	15:00:00																											210.5	0.09	0.239625	904.19	27.2667	3.95	1.37	2
2013-09-26	19:00:00																											125.45	0.05	0.238875	904.76	27.2572	3.99	1.48	2
2013-09-26	23:00:00																											108.24	0.02	0.237625	903.74	27.2597	3.91	1.7	2
2013-09-27	03:00:00																											229.43	0.02	0.2369	903.25	27.2615	3.95	1.75	-30
2013-09-27	07:00:00																											268.32	0.06	0.2392	904.19	27.2652	3.96	1.7	-30
2013-09-27	11:00:00																											152	0.05	0.23775	904.2	27.2655	3.93	1.49	-30
2013-09-27	15:00:00																											233.88	0.12	0.23935	904.02	27.2685	3.97	1.55	-30
2013-09-27	19:00:00																											236.42	0.12	0.241525	904.62	27.2644	4.03	1.61	-30
2013-09-27	23:00:00																											253.18	0.03	0.23905	904.07	27.2233	4.04	1.73	-30
2013-09-28	03:00:00																											239.29	0.05	0.236825	903.21	27.2865	3.96	1.56	-195
2013-09-28	07:00:00																											316.93	0.03	0.2358	903.98	27.2762	3.99	2.13	-195
2013-09-28	11:00:00																											306.75	0.06	0.23885	904.39	27.2756	3.97	2.08	-195
2013-09-28	15:00:00																											246.76	0.04	0.23805	903.95	27.2683	3.97	1.8	-195
2013-09-28	19:00:00																											234.21	0.08	0.2414	904.42	27.2412	4.04	2.44	-195
2013-09-28	23:00:00																											326.93	0.06	0.2389	904.39	27.2499	4.04	1.72	-195
2013-09-29	03:00:00																											240.92	0.03	0.2368	903.3	27.2499	3.96	1.92	-237
2013-09-29	07:00:00																											301.73	0.09	0.238775	903.72	27.2829	3.93	1.9	-237
2013-09-29	11:00:00																											229.4	0.04	0.238225	904.53	27.2716	3.96	2.29	-237
2013-09-29	15:00:00																											228.47	0.15	0.24195	903.95	27.2656	3.9	1.59	-237
2013-09-29	19:00:00																											164.36	0.04	0.2425	904.18	27.2575	4.07	1.64	-237
2013-09-29	23:00:00																											306.99	0.05	0.2415	904.62	27.2419	4.03	1.55	-237
2013-09-30	03:00:00																											346.28	0.08	0.240575	903.48	27.2695	3.99	1.21	-71
2013-09-30	07:00:00																											210.41	0.08	0.240125	903.49	27.2972	3.88	1.43	-71
2013-09-30	11:00:00																											234.32	0.15	0.241475	904.62	27.2906	3.89	1.45	-71
2013-09-30	15:00:00																											213.35	0.09	0.240425	904.02	27.2728	3.96	1.45	-71
2013-09-30	19:00:00																											255.79	0.04	0.238975	903.85	27.2696	3.9	1.69	-71
2013-09-30	23:00:00																											264.23	0.07	0.238975	904.73	27.2798	3.9	1.86	-71
2013-10-01	03:00:00																											282.85	0.11	0.2399	903.75	27.2553	3.94	1.42	-38
2013-10-01	07:00:00																											158.97	0.04	0.238775	903.28	27.2899	3.87	2.12	-38
2013-10-01	11:00:00																											227.17	0.11	0.240225	904.63	27.2743	3.92	1.15	-38
2013-10-01	15:00:00	7	2	1	0	0	0	1	0	0	0	0	0	0	0	0	0	0	0	0	0	2	0	0	0	0	7	105.87	0.03	0.236775	904.17	27.3016	3.9	1.76	-38
2013-10-01	19:00:00	14	1	0	0	0	1	0	0	0	0	0	0	0	0	0	0	0	0	0	0	0	0	0	0	0	2	205.29	0.07	0.240825	903.54	27.2883	3.87	1.76	-38
2013-10-01	23:00:00	12	2	0	0	0	1	0	0	0	0	0	0	0	0	0	1	0	0	0	0	0	0	0	0	0	6	215.6	0.12	0.238875	904.7	27.2956	3.86	1.47	-38
2013-10-02	03:00:00	13	3	1	0	0	2	0	0	0	0	0	0	0	0	0	0	0	0	0	0	0	0	1	0	0	3	206.14	0.09	0.2384	904.05	27.2689	3.9	2.13	-1
2013-10-02	07:00:00	13	1	0	0	0	1	0	0	0	0	0	0	0	0	0	0	0	0	0	0	0	1	1	0	0	6	82.85	0.05	0.241325	903.15	27.2797	3.79	1.53	-1
2013-10-02	11:00:00	15	0	0	0	0	0	0	0	0	0	0	0	1	0	0	0	0	0	0	0	0	0	0	0	0	1	226.23	0.18	0.2414	904.58	27.3126	3.83	1.31	-1
2013-10-02	15:00:00	15	0	1	0	0	0	1	0	0	0	0	0	0	1	0	3	0	0	0	0	0	0	0	0	0	10	231.02	0.19	0.24015	904.33	27.2771	3.87	1.75	-1
2013-10-02	19:00:00	6	1	1	0	0	0	0	0	0	0	0	0	0	0	0	0	0	0	0	0	0	0	0	0	0	1	172.59	0.07	0.239475	903.25	27.2568	3.87	0.98	-1
2013-10-02	23:00:00	14	0	0	0	2	0	0	0	0	0	0	0	0	0	0	9	0	0	0	0	0	0	1	0	0	5	197.54	0.06	0.2402	904.55	27.2963	3.84	1.48	-1
2013-10-02	03:00:00																											233.49	0.22	0.239925	904.37	27.2965	3.92	1.27	-4
2013-10-03	07:00:00	20	0	1	0	0	4	2	0	0	0	0	0	0	0	0	2	0	0	0	0	0	0	2	0	0	7	257.56	0.08	0.240225	903.08	27.2644	3.88	2.53	-4
2013-10-03	11:00:00	12	0	0	0	0	1	0	0	0	0	0	0	0	0	0	0	0	0	0	0	0	0	1	0	0	2	198.66	0.06	0.2431	904.49	27.3133	3.8	2.39	-4
2013-10-03	15:00:00	10	0	1	0	0	0	0	0	0	0	0	0	0	1	0	0	0	0	0	0	0	0	0	0	0	0	235.85	0.26	0.24425	904.61	27.3097	3.83	0.96	-4
2013-10-03	19:00:00	10	0	0	0	1	0	0	0	0	0	0	0	0	0	0	0	0	0	0	0	0	0	0	0	0	1	298.47	0.11	0.2401	903.03	27.2533	3.93	0.95	-4
2013-10-03	23:00:00	14	0	0	0	0	0	2	0	0	0	0	0	0	0	0	2	0	0	0	0	0	0	0	0	0	1	243.43	0.05	0.241675	904.25	27.2971	3.85	1.41	-4
2013-10-03	03:00:00																											239.44	0.2	0.244	904.69	27.3008	3.87	1.11	-4
2013-10-04	07:00:00	11	2	1	0	0	0	0	0	0	0	0	0	0	1	0	2	0	0	0	0	0	2	0	0	0	3	236.76	0.06	0.2397	903.16	27.2832	3.92	1.61	-37
2013-10-04	11:00:00	11	0	0	0	0	0	0	0	0	0	1	0	0	0	0	1	0	0	0	0	0	0	0	0	0	4	200.35	0.06	0.238525	904.35	27.276	3.9	1.51	-37
2013-10-04	15:00:00	12	0	1	0	0	2	1	0	0	0	0	0	0	0	0	0	0	0	0	0	0	0	0	0	0	2	235.1	0.17	0.240675	904.89	27.2811	3.95	1.38	-37
2013-10-04	19:00:00	12	1	0	0	0	2	0	0	0	0	0	0	0	0	0	0	0	0	0	0	0	0	1	0	0	0	121.1	0.05	0.23955	902.99	27.2459	3.93	1.58	-37
2013-10-04	23:00:00	10	0	0	0	0	0	0	0	0	0	1	0	0	0	0	0	0	0	0	0	0	2	0	0	0	2	186.78	0.03	0.23805	903.86	27.2925	3.91	1.82	-37
2013-10-05	03:00:00	10	0	1	0	0	1	0	0	0	0	0	0	0	1	0	0	0	0	0	0	0	0	1	0	0	10	236.33	0.23	0.24205	904.9	27.3056	3.91	1.48	-37
2013-10-05	07:00:00	10	0	1	0	0	0	0	0	0	0	0	0	0	0	0	1	0	0	0	0	0	0	2	0	0	2	299.05	0.1	0.239775	903.31	27.2522	3.98	2.41	-17
2013-10-05	11:00:00	14	0	0	0	0	1	0	0	0	0	0	0	0	0	0	0	0	0	0	0	0	0	0	0	0	8	194.75	0.07	0.240725	904.14	27.3045	3.88	1.46	-17
2013-10-05	15:00:00	12	0	0	0	0	1	0	0	0	0	0	0	0	0	0	0	0	0	0	0	0	1	0	0	0	0	233.81	0.21	0.241475	905.13	27.2987	3.94	1.1	-17
2013-10-05	19:00:00	14	0	2	0	0	0	0	0	0	0	0	0	0	0	0	0	0	0	0	0	0	0	0	0	0	0	262.43	0.17	0.2437	903.05	27.2527	4.07	0.9	-17
2013-10-06	23:00:00	6	1	1	0	0	0	0	0	0	0	0	0	0	0	0	1	0	0	0	0	0	0	0	0	0	3	257.94	0.1	0.242125	903.39	27.2653	3.96	1.68	-17
2013-10-06	03:00:00	8	0	0	0	0	3	0	0	0	0	0	0	0	0	0	0	0	0	0	0	0	0	0	0	0	2	214.58	0.14	0.24445	904.96	27.3046	3.93	1.53	-17
2013-10-06	07:00:00	7	0	0	0	0	0	0	0	0	0	0	0	0	0	0	0	0	0	0	0	0	0	0	0	0	0	142.01	0.08	0.2441	903.57	27.2933	3.97	1.15	-64
2013-10-06	11:00:00	7	0	0	0	0	0	0	0	0	0	0	0	0	0	0	0	0	0	0	0	0	0	0	0	0	4	171.8	0.04	0.244375	903.91	27.2971	3.85	1.8	-64
2013-10-06	15:00:00	10	0	0	0	0	0	0	0	0	0	0	0	0	0	0	0	0	0	0	0	0	0	0	0	0	6	236.08	0.17	0.247275	905.3	27.3051	3.87	1.2	-64
2013-10-06	19:00:00																											223.17	0.1	0.2455	903.34	27.2458	3.98	1.15	-64
2013-10-06	23:00:00	5	0	0	0	0	0	0	0	0	0	0	0	0	0	0	0	0	0	0	0	0	0	0	0	0	0	144.5	0.05	0.247675	902.99	27.3026	3.83	1.36	-64
2013-10-07	03:00:00																											238.71	0.25	0.248575	904.84	27.318	3.88	0.86	-64
2013-10-07	07:00:00																											174.03	0.07	0.249525	903.88	27.2796	3.83	1.38	30
2013-10-07	11:00:00																											113.15	0.08	0.252375	903.72	27.3176	3.77	1.65	30
2013-10-07	15:00:00																											230.56	0.32	0.253525	905.32	27.3282	3.79	0.54	30
2013-10-07	19:00:00																											221.48	0.2	0.249425	903.72	27.2766	3.89	0.65	30
2013-10-07	23:00:00																											302.68	0.1	0.24665	902.66	27.2592	3.88	1.04	30
2013-10-08	03:00:00																											184.55	0.15	0.255625	904.56	27.3311	3.75	2.07	57
2013-10-08	07:00:00																											230.18	0.21	0.253025	904.22	27.3091	3.81	1.38	57
2013-10-08	11:00:00																											108.45	0.06	0.2524	903.6	27.2787	3.8	1.78	57
2013-10-08	15:00:00																											203.15	0.11	0.2548	905.19	27.3155	3.75	2.28	57
2013-10-08	19:00:00																											217.86	0.17	0.251825	904.2	27.281	3.85	1.98	57
2013-10-08	23:00:00																											76.22	0.05	0.2475	902.56	27.2523	3.94	2.34	57
2013-10-09	03:00:00																											62.44	0.05	0.2513	904.14	27.3068	3.82	2.68	4
2013-10-09	07:00:00																											191.36	0.09	0.26215	904.48	27.3128	3.72	3.55	4
2013-10-09	11:00:00																											92	0.04	0.253475	903.61	27.288	3.85	3.42	4
2013-10-09	15:00:00																											226.27	0.13	0.25255	904.9	27.2882	3.84	3.86	4
2013-10-09	19:00:00																											202.9	0.09	0.24795	904.62	27.2962	3.96	2.8	4
2013-10-09	23:00:00																											33.46	0.05	0.24865	902.7	27.2483	3.9	2.96	4
2013-10-10	03:00:00																											150.07	0.06	0.25255	903.68	27.3053	3.82	3.36	24
2013-10-10	07:00:00																											226.35	0.15	0.25545	904.62	27.3065	3.81	1.36	24
2013-10-10	11:00:00																											203.08	0.02	0.25315	903.76	27.2901	3.81	2.71	24
2013-10-10	15:00:00																											224.22	0.17	0.25175	904.54	27.2882	3.85	1.38	24
2013-10-10	19:00:00																											205.82	0.12	0.247625	904.9	27.2742	4	1.65	24
2013-10-10	23:00:00																											282.15	0.04	0.245025	903.07	27.2486	3.96	2.93	24
2013-10-11	03:00:00																											145.59	0.05	0.245225	903.25	27.2868	3.9	3.06	2
2013-10-11	07:00:00																											174.2	0.05	0.251575	904.58	27.3143	3.82	3.31	2
2013-10-11	11:00:00																											229.57	0.1	0.2526	904	27.2911	3.84	2.93	2
2013-10-11	15:00:00																											109.44	0.02	0.247425	904.16	27.2844	3.86	1.29	2
2013-10-11	19:00:00																											221.06	0.09	0.249575	904.95	27.2846	3.92	1.24	2
2013-10-11	23:00:00																											108.8	0.05	0.247425	903.58	27.2428	3.93	1.17	2
2013-10-12	03:00:00																											130.85	0.07	0.246725	902.98	27.2991	3.86	1.36	8
2013-10-12	07:00:00																											182.22	0.07	0.2463	904.38	27.3207	3.86	1.42	8
2013-10-12	11:00:00																											223.17	0.12	0.25585	904.3	27.2945	3.78	1.27	8
2013-10-12	15:00:00																											128.09	0.09	0.256325	903.84	27.279	3.83	1.17	8
2013-10-12	19:00:00																											216.32	0.08	0.251925	904.76	27.2701	3.9	1.22	8
2013-10-12	23:00:00																											105.12	0.05	0.2504	904.13	27.2833	3.93	1.19	8
2013-10-13	03:00:00																											82.93	0.05	0.251525	902.92	27.29	3.85	1.44	10
2013-10-13	07:00:00																											136.57	0.02	0.25275	904.07	27.2984	3.85	2.97	10
2013-10-13	11:00:00																											225.2	0.08	0.25315	904.62	27.2994	3.84	0.9	10
2013-10-13	15:00:00																											197.24	0.05	0.252925	903.69	27.2752	3.83	1.02	10
2013-10-13	19:00:00																											221.8	0.06	0.251275	904.37	27.2822	3.9	1.11	10
2013-10-13	23:00:00																											149.81	0.09	0.25055	904.58	27.2614	3.92	1.02	10
2013-10-14	03:00:00																											63.29	0.07	0.24855	903.09	27.2572	3.88	1.12	8
2013-10-14	07:00:00																											143.76	0.05	0.249	903.69	27.3069	3.85	1.13	8
2013-10-14	11:00:00																											204.96	0.09	0.2539	904.85	27.311	3.83	1.09	8
2013-10-14	15:00:00																											174.34	0.09	0.25445	903.72	27.2829	3.83	1.09	8
2013-10-14	19:00:00																											142.11	0.08	0.24935	903.84	27.2647	3.93	1.11	8
2013-10-14	23:00:00																											116.21	0.06	0.246425	904.82	27.2925	3.92	1.15	8
2013-10-15	03:00:00																											135.75	0.1	0.245325	903.44	27.2861	3.9	1.1	11
2013-10-15	07:00:00																											95.93	0.06	0.246925	903.38	27.3015	3.84	1.16	11
2013-10-15	11:00:00																											136.66	0.07	0.2472	904.98	27.3104	3.84	1.13	11
2013-10-15	15:00:00																											216.32	0.15	0.254475	903.96	27.2947	3.75	1.22	11
2013-10-15	19:00:00																											146.6	0.06	0.24695	903.36	27.2502	3.89	1.22	11
2013-10-15	23:00:00																											120.6	0.05	0.242675	904.81	27.2675	3.91	1.28	11
2013-10-16	03:00:00																											158.54	0.07	0.24385	903.91	27.2938	3.93	1.3	10
2013-10-16	07:00:00																											73.93	0.05	0.247475	903.19	27.2933	3.8	1.34	10
2013-10-16	11:00:00																											188.99	0.08	0.2492	904.96	27.3005	3.8	1.28	10
2013-10-16	15:00:00																											198.25	0.13	0.2474	904.31	27.2835	3.88	1.06	10
2013-10-16	19:00:00																											96.62	0.06	0.242525	902.98	27.2467	3.93	1.26	10
2013-10-16	23:00:00																											145.88	0.07	0.247425	904.58	27.3053	3.82	1.24	10
2013-10-17	03:00:00																											220.38	0.15	0.248925	904.37	27.2888	3.88	1.11	5
2013-10-17	07:00:00																											119.36	0.04	0.24515	903.15	27.2787	3.9	1.37	5
2013-10-17	11:00:00																											145.5	0.06	0.24805	904.82	27.2977	3.81	1.34	5
2013-10-17	15:00:00																													0.248175	904.68	27.2946			5
2013-10-17	19:00:00																											166.62	0.04	0.24355	902.78	27.2537	3.95	1.23	5
2013-10-17	23:00:00																											57.54	0.03	0.241525	904.17	27.2693	3.9	1.19	5
2013-10-18	03:00:00																											185.8	0.09	0.244025	904.73	27.3026	3.9	1.16	13
2013-10-18	07:00:00																											98.84	0.06	0.24355	903.25	27.2756	3.9	1.16	13
2013-10-18	11:00:00																											190.78	0.06	0.243725	904.59	27.2761	3.9	1.09	13
2013-10-18	15:00:00																											207.88	0.08	0.244025	905.01	27.2676	3.97	1.19	13
2013-10-18	19:00:00																											122.79	0.04	0.2425	902.81		4	1.17	13
2013-10-18	23:00:00																											113.29	0.03	0.242975	903.71		3.9	1.23	13
2013-10-19	03:00:00																											221.04	0.17	0.248675	904.94	27.2913	3.9	2.27	23
2013-10-19	07:00:00																											195.36	0.05	0.246775	903.48	27.2462	3.92	1.2	23
2013-10-19	11:00:00																											100.05	0.05	0.245325	904.33	27.2563	3.89	1.07	23
2013-10-19	15:00:00																											230.26	0.19	0.247025	905.22	27.2881	3.92	0.98	23
2013-10-19	19:00:00																											183.77	0.07	0.24555	903	27.2294	4	1.01	23
2013-10-19	23:00:00																											57.19	0.05	0.2455	903.27	27.2527	3.92	1.13	23
2013-10-20	03:00:00																											210.26	0.16	0.247875	904.92	27.2966	3.89	1.4	12
2013-10-20	07:00:00																											145.57	0.08	0.24945	903.74	27.2596	3.89	1.18	12
2013-10-20	11:00:00																											127.54	0.03	0.246575	904.06	27.2567	3.84	1.29	12
2013-10-20	15:00:00																											215.27	0.1	0.245825	905.27	27.2776	3.96	1.08	12
2013-10-20	19:00:00																											181.59	0.08	0.2449	903.3	27.2481	3.99	1.11	12
2013-10-20	23:00:00																											78.93	0.06	0.243475	902.92	27.2586	3.91	1.11	12
2013-10-21	03:00:00																											224.21	0.13	0.248425	904.76	27.289	3.91	1.62	7
2013-10-21	07:00:00																											233.27	0.09	0.24695	904	27.2641	3.89	1.15	7
2013-10-21	11:00:00																											80.64	0.02	0.242075	903.86	27.2448	3.91	1.25	7
2013-10-21	15:00:00																											189.19	0.11	0.242725	905.21	27.2697	3.91	1.13	7
2013-10-21	19:00:00																											155.05	0.07	0.2458	903.67	27.237	3.97	1.2	7
2013-10-21	23:00:00																											56.36	0.14	0.242725	902.74	27.2486	3.94	1.13	7
2013-10-22	03:00:00																											184.35	0.07	0.245	904.51	27.2825	3.9	2.26	-2
2013-10-22	07:00:00																											233.07	0.16	0.246225	904.27	27.2652	3.92	0.79	-2
2013-10-22	11:00:00																											88.89	0.04	0.243125	903.78	27.2422	3.94	0.98	-2
2013-10-22	15:00:00																											204.78	0.11	0.243375	905.05	27.2498	3.97	0.78	-2
2013-10-22	19:00:00																											257.18	0.05	0.24565	904.04	27.256	4.04	0.97	-2
2013-10-22	23:00:00																											73.51	0.04	0.242325	902.73	27.2254	3.99	1.15	-2
2013-10-23	03:00:00																											203.15	0.09	0.24515	904.19	27.2867	3.96	2.17	-7
2013-10-23	07:00:00																											222.82	0.1	0.246675	904.44	27.2635	3.94	1.48	-7
2013-10-23	11:00:00																											50.18	0.04	0.2432	903.79	27.224	3.96	1.37	-7
2013-10-23	15:00:00																											210.81	0.11	0.2444	904.84	27.255	3.96	1.39	-7
2013-10-23	19:00:00																											186.18	0.1	0.2479	904.34	27.2673	4.06	2.1	-7
2013-10-23	23:00:00																											51.55	0.06	0.245025	902.85	27.2233	4.04	1.32	-7
2013-10-24	03:00:00																											144.4	0.08	0.2453	903.88	27.2813	3.93	2.42	4
2013-10-24	07:00:00																											230.94	0.13	0.248075	904.55	27.2775	3.89	1.64	4
2013-10-24	11:00:00																											154.9	0.05	0.245525	903.88	27.2331	3.96	1.74	4
2013-10-24	15:00:00																											178.06	0.1	0.245	904.58	27.2484	3.96	1.76	4
2013-10-24	19:00:00																											175.08	0.07	0.24635	904.53	27.2601	4.02	1.69	4
2013-10-24	23:00:00																											45.14	0.18	0.24455	903.09	27.2213	3.98	1.56	4
2013-10-25	03:00:00																											172.09	0.08	0.24465	903.61	27.2722	3.94	2.07	10
2013-10-25	07:00:00																											229.21	0.13	0.24675	904.55	27.268	3.94	1.8	10
2013-10-25	11:00:00																											116.93	0.04	0.244875	904.03	27.2382	3.97	1.28	10
2013-10-25	15:00:00																											157.8	0.05	0.2441	904.33	27.2437	3.97	1.28	10
2013-10-25	19:00:00																											228.36	0.1	0.2461	904.62	27.2645	4.01	1.25	10
2013-10-25	23:00:00																											80.41	0.06	0.245025	903.4	27.2203	4.02	1.22	10
2013-10-26	03:00:00																											105.76	0.07	0.2428	903.4	27.2634	3.96	1.36	36
2013-10-26	07:00:00																											229.64	0.11	0.24665	904.47	27.2607	4.01	1.34	36
2013-10-26	11:00:00																											173.22	0.04	0.244675	904.19	27.2388	4.01	1.5	36
2013-10-26	15:00:00																											133.46	0.08	0.2463	904.09	27.2318	4.06	1.55	36
2013-10-26	19:00:00																											179.22	0.11	0.250625	904.55	27.2179	4.11	1.35	36
2013-10-26	23:00:00																											135.15	0.09	0.2447	903.73	27.2423	4.05	1.33	36
2013-10-27	03:00:00																											84.97	0.12	0.241425	903.27	27.2704	3.99	1.39	94
2013-10-27	07:00:00																											234.37	0.12	0.245775	904.31	27.262	3.99	1.32	94
2013-10-27	11:00:00																											138.04	0.07	0.24345	904.37	27.2455	4	1.29	94
2013-10-27	15:00:00																											143.61	0.07	0.24125	903.89	27.2721	3.93	1.36	94
2013-10-27	19:00:00																											222.44	0.13	0.2444	904.4	27.2649	3.98	1.3	94
2013-10-27	23:00:00																											190.39	0.07	0.2418	904.03	27.2341	4.01	1.37	94
2013-10-28	03:00:00																											59.19	0.09	0.23945	903.25	27.24	3.94	1.51	0
2013-10-28	07:00:00																											215.17	0.04	0.24415	904.11	27.275	4.03	2.2	0
2013-10-28	11:00:00																											192.71	0.09	0.244625	904.55	27.2669	3.94	1.78	0
2013-10-28	15:00:00																											79.18	0.03	0.243	903.77		4	3.34	0
2013-10-28	19:00:00																											197.33	0.06	0.246725	904.12		4.09		0
2013-10-28	23:00:00																											74.72	0.02	0.242	904.3		4.03		0
2013-10-29	03:00:00																											66.07	0.03	0.240275	903.35		4.02		-1
2013-10-29	07:00:00																											174.46	0.03	0.241575	903.92		4.03		-1
2013-10-29	11:00:00																											244.55	0.04	0.244175	904.74		3.96		-1
2013-10-29	15:00:00																											160.31	0.08	0.243175	903.77		3.97		-1
2013-10-29	19:00:00																											99.59	0.04	0.244275	903.81		4.05		-1
2013-10-29	23:00:00																											155.4	0.03	0.24505	904.5		4.05		-1
2013-10-30	03:00:00																											104.66	0.08	0.242625	903.53		3.99		-35
2013-10-30	07:00:00																											222.53	0.07	0.242675	903.72		3.95		-35
2013-10-30	11:00:00																											241.5	0.22	0.245	904.88		3.99	1.89	-35
2013-10-30	15:00:00																											158.85	0.05	0.24495	903.86		4.04	1.08	-35
2013-10-30	19:00:00																											337.92	0.06	0.24235	903.44		3.96	1.05	-35
2013-10-30	23:00:00																											260.62	0.1	0.2458	904.55		4.05	1.13	-35
2013-10-31	03:00:00																											251.73	0.05	0.24535	903.81		3.98	1.07	0
2013-10-31	07:00:00																											155.01	0.05	0.243175	903.55		3.94	2.66	0
2013-10-31	11:00:00																											216.6	0.16	0.246575	904.95		3.96	1.13	0
2013-10-31	15:00:00																											255.28	0.09	0.2451	904.04		4	1.04	0
2013-10-31	19:00:00																											175.51	0.06	0.243225	903.06		3.9	0.96	0
2013-10-31	23:00:00																											264.71	0.12	0.24525	904.45		3.95	1.23	0
2013-11-01	03:00:00																											190.44	0.12	0.245875	904.13		3.95	1.21	-14
2013-11-01	07:00:00																											150.38	0.05	0.24445	903.42		3.9	1.66	-14
2013-11-01	11:00:00																											232.61	0.1	0.24555	904.96	27.2857	3.91	2.03	-14
2013-11-01	15:00:00	14	1	0	0	0	0	1	0	0	0	0	0	0	0	0	0	0	0	0	0	0	1	0	0	0	1	198.62	0.14	0.24695	904.35	27.2518	3.95	1.87	-14
2013-11-01	19:00:00	3	0	0	0	0	1	0	0	0	0	0	0	0	1	0	0	0	0	0	0	0	0	0	0	0	0	177.11	0.08	0.244775	902.77	27.2304	3.97	1.17	-14
2013-11-01	23:00:00																											151.15	0.05	0.24425	904.23	27.2729	3.92	1.7	-14
2013-11-02	03:00:00																											235.57	0.2	0.24565	904.5	27.2576	3.94	1.13	159
2013-11-02	07:00:00																											93.75	0.05	0.2448	903.39	27.2245	3.96	1.45	159
2013-11-02	11:00:00																											183.06	0.02	0.2431	904.86	27.2658	3.97	2.25	159
2013-11-02	15:00:00																											263.9	0.12	0.246125	904.72	27.2653	3.98	1.67	159
2013-11-02	19:00:00																											181.6	0.05	0.245175	902.62	27.2379	3.96	1.61	159
2013-11-02	23:00:00																											240.46	0.09	0.2483	903.81	27.2839	3.94	1.6	159
2013-11-03	03:00:00																											251.2	0.11	0.2461	904.75	27.2496	3.99	1.64	25
2013-11-03	07:00:00																											262.78	0.06	0.2462	903.45	27.2471	3.97	1.66	25
2013-11-03	11:00:00																											194.25	0.05	0.24465	904.65	27.2819	3.97	3.12	25
2013-11-03	15:00:00																											232.3	0.22	0.2493	905.08	27.2853	4.04	1.56	25
2013-11-03	19:00:00	6	0	0	0	0	0	0	0	0	0	0	0	0	0	0	1	0	0	0	0	0	1	0	0	0	0	207.63	0.05	0.250975	902.65	27.2375	4.13	1.98	25
2013-11-03	23:00:00	20	2	0	0	0	2	5	0	0	0	0	0	0	0	0	0	0	0	0	0	0	7	0	0	0	1	132.56	0.07	0.246925	903.31	27.2775	3.94	2.04	25
2013-11-04	03:00:00	11	0	1	0	0	0	2	0	0	0	0	0	0	0	0	0	1	0	0	0	0	5	0	0	0	0	245.18	0.22	0.2512	904.89	27.2927	3.86	1.88	-49
2013-11-04	07:00:00	11	0	3	0	0	1	1	0	0	0	0	1	0	0	0	1	1	0	0	0	0	1	0	0	0	0	151.43	0.1	0.24905	903.64	27.254	3.94	2.61	-49
2013-11-04	11:00:00	13	0	2	0	0	1	0	0	0	0	0	0	0	0	0	3	2	0	0	0	0	3	0	0	0	0	145.97	0.07	0.2496	904.38	27.2811	3.87	1.68	-49
2013-11-04	15:00:00	11	0	0	0	0	0	0	0	0	0	0	1	0	0	0	2	0	0	0	0	0	1	0	0	0	0	235.19	0.2	0.252425	905.36	27.2683	3.88	1.36	-49
2013-11-04	19:00:00	13	0	2	0	0	0	1	0	0	0	0	1	0	0	1	9	1	0	0	0	0	1	0	0	0	0	237.39	0.08	0.248275	902.92	27.2326	4.02	1.87	-49
2013-11-04	23:00:00	11	0	0	0	0	1	0	0	0	0	0	0	0	0	0	0	0	0	0	0	0	6	0	0	0	3	128.54	0.03	0.2466	902.84	27.2547	4	1.95	-49
2013-11-05	03:00:00	10	0	0	0	0	0	2	0	0	0	0	0	0	0	0	0	0	0	0	0	0	1	0	0	0	2	181.25	0.11	0.2476	904.86	27.2663	3.92	1.7	-1
2013-11-05	07:00:00	10	0	1	0	0	0	0	0	0	0	0	0	0	0	0	0	2	0	0	0	0	1	0	0	0	2	241.88	0.21	0.247125	903.94	27.2386	3.95	2.05	-1
2013-11-05	11:00:00	12	0	0	0	0	0	0	0	0	0	0	0	0	0	0	0	0	0	0	0	0	3	0	0	0	0	229.38	0.18	0.248225	904.09	27.2252	4.05	1.21	-1
2013-11-05	15:00:00	12	0	0	0	0	0	0	0	0	0	0	0	0	0	0	0	0	0	0	0	0	3	0	0	0	1	218.92	0.27	0.25245	905.48	27.2158	4.11	1.37	-1
2013-11-05	19:00:00	12	0	0	0	0	0	0	0	0	0	0	0	0	0	0	0	0	0	0	0	0	2	0	0	0	1	236.35	0.15	0.2606	903.4	27.1779	4.22	1.8	-1
2013-11-05	23:00:00	15	0	0	0	0	0	0	0	0	0	0	0	0	0	0	0	0	0	0	0	0	16	0	0	0	1	256.51	0.06	0.25225	902.5	27.2205	4.11	2.47	-1
2013-11-06	03:00:00	11	0	0	0	0	0	0	0	0	0	0	0	0	0	0	0	0	0	0	0	0	0	0	0	0	0	228.83	0.13	0.254325	904.64	27.2692	4.09	1.63	-137
2013-11-06	07:00:00	10	0	0	0	2	0	2	0	0	0	0	0	0	0	0	1	0	0	0	0	0	0	0	0	0	0	191.85	0.06	0.2581	904.27	27.2552	4.16	2.34	-137
2013-11-06	11:00:00	9	0	0	0	1	0	1	0	0	0	0	0	0	0	0	1	0	0	0	0	0	5	0	0	0	2	172.35	0.04	0.250575	903.85	27.3006	3.94	2.24	-137
2013-11-06	15:00:00	11	1	1	0	1	0	0	0	0	0	0	0	0	0	0	0	0	0	0	0	0	4	0	0	0	2	243.93	0.24	0.257325	905.39	27.2938	3.82	2.45	-137
2013-11-06	19:00:00	12	0	3	0	1	1	0	0	0	0	0	0	0	0	0	1	0	0	0	0	0	0	0	0	0	0	197.04	0.11	0.255725	903.98	27.2469	3.9	1.48	-137
2013-11-06	23:00:00	10	0	0	0	1	1	0	0	0	0	0	0	0	0	0	2	0	0	0	0	0	1	0	0	0	0	112.33	0.06	0.249975	902.38	27.2415	3.91	2.81	-137
2013-11-07	03:00:00	10	0	0	0	1	0	0	0	0	0	0	0	0	0	0	0	0	0	0	0	0	0	0	0	0	1	192.54	0.17	0.252175	904.26	27.3019	3.86	1.3	-46
2013-11-07	07:00:00	9	0	1	0	0	0	0	0	0	0	1	0	0	0	0	0	0	0	0	0	0	0	0	0	0	0	227.87	0.18	0.256075	904.59	27.2723	3.83	1.21	-46
2013-11-07	11:00:00	9	0	0	0	0	0	0	0	0	0	0	0	0	0	0	1	0	0	0	0	0	1	0	0	0	1	170.33	0.03	0.251825	903.74	27.2441	3.97	1.21	-46
2013-11-07	15:00:00	10	0	0	0	0	0	1	0	0	0	0	0	0	0	0	0	0	0	0	0	0	3	0	0	0	0	246.84	0.09	0.2515	905.05	27.2564	4	1.82	-46
2013-11-07	19:00:00	9	1	2	0	0	1	0	0	0	0	1	0	0	0	0	1	0	0	0	0	0	1	1	0	0	2	159.79	0.04	0.2517	904.47	27.2697	3.96	1.69	-46
2013-11-07	23:00:00	10	0	2	0	1	0	0	0	0	0	0	0	0	0	0	0	0	0	0	0	0	0	0	0	0	0	70.22	0.04	0.250425	902.51	27.2671	3.87	1.63	-46
2013-11-08	03:00:00	7	0	1	0	0	0	1	0	0	0	0	0	0	0	0	0	0	0	0	0	0	2	0	0	0	0	210.56	0.11	0.251475	903.8	27.2998	3.86	1.61	-5
2013-11-08	07:00:00	7	1	0	0	0	0	0	0	0	0	0	0	0	0	1	0	0	0	0	0	0	0	0	0	0	0	269.7	0.12	0.253075	904.75	27.2669	3.85	1.19	-5
2013-11-08	11:00:00	9	1	1	0	0	0	0	0	0	0	0	0	0	0	1	2	0	0	0	0	0	0	0	0	0	1	223.84	0.03	0.253725	903.76	27.2914	3.82	1.39	-5
2013-11-08	15:00:00	8	0	1	0	0	1	0	0	0	0	0	0	0	0	1	0	0	0	0	0	0	4	0	0	0	1	229.58	0.16	0.2527	904.58	27.2916	3.84	0.91	-5
2013-11-08	19:00:00	11	1	0	0	0	0	0	0	0	0	0	0	0	1	0	7	0	0	0	0	0	0	0	0	0	1	231.1	0.18	0.252525	904.77	27.2604	3.96	0.7	-5
2013-11-08	23:00:00																											283.56	0.06	0.250825	902.85	27.2485	3.97	1.06	-5
2013-11-09	03:00:00																											252.06	0.06	0.2491	903.38	27.2967	3.87	1.06	-15
2013-11-09	07:00:00																											238.57	0.25	0.2592	904.84	27.3117	3.77	0.65	-15
2013-11-09	11:00:00																											258.13	0.12	0.253575	903.99	27.2518	3.92	0.76	-15
2013-11-09	15:00:00																											200.83	0.04	0.250975	904.09	27.2625	3.95	1.01	-15
2013-11-09	19:00:00																											184.33	0.09	0.2511	904.84	27.2863	3.95	0.91	-15
2013-11-09	23:00:00																											293.98	0.03	0.25	903.39	27.2448	3.98	1.24	-15
2013-11-10	03:00:00																											168.23	0.02	0.248725	903.12	27.2463	3.96	1.22	-59
2013-11-10	07:00:00																											261.91	0.06	0.249075	904.73	27.2952	3.94	1.14	-59
2013-11-10	11:00:00																											199.49	0.09	0.2512	904.35	27.2789	3.97	0.91	-59
2013-11-10	15:00:00																											176.86	0.12	0.249975	903.73	27.2632	3.95	1.57	-59
2013-11-10	19:00:00																											232.08	0.16	0.2543	904.64	27.2213	4.05	0.68	-59
2013-11-10	23:00:00																											172.58	0.06	0.254425	903.92	27.2403	4.06	1.3	-59
2013-11-11	03:00:00																											119.14	0.04	0.25105	903.05	27.287	3.91	1.34	-228
2013-11-11	07:00:00																											227.85	0.19	0.255375	904.49	27.299	3.83	0.92	-228
2013-11-11	11:00:00																											232.37	0.21	0.2553	904.7	27.2537	3.98	0.67	-228
2013-11-11	15:00:00																											204.47	0.09	0.254525	903.53	27.2308	4.07	1.09	-228
2013-11-11	19:00:00																											162.42	0.05	0.2519	904.24	27.2724	3.97	1.38	-228
2013-11-11	23:00:00																											240.35	0.05	0.2513	904.37	27.2432	3.94	1.32	-228
2013-11-12	03:00:00																											252.21	0.05	0.252275	903.21	27.2555	3.98	1.27	-79
2013-11-12	07:00:00																											166.08	0.1	0.25385	904.17	27.2593	4.01	1.07	-79
2013-11-12	11:00:00																											208.78	0.03	0.252975	904.98	27.2702	4.01	1.61	-79
2013-11-12	15:00:00																											238.39	0.08	0.2573	903.51	27.2533	3.96	1.45	-79
2013-11-12	19:00:00																											237.33	0.22	0.263125	903.68	27.2484	4.06	0.88	-79
2013-11-12	23:00:00																											81.38	0.06	0.262125	904.56	27.2139	4.09	1.27	-79
2013-11-13	03:00:00																											148.46	0.02	0.25395	903.47	27.2538	3.98	1.58	6
2013-11-13	07:00:00																											234.35	0.2	0.26095	903.85	27.2884	3.96	1.09	6
2013-11-13	11:00:00																											233.39	0.27	0.2628	905.11	27.2582	4.01	0.64	6
2013-11-13	15:00:00																											133.24	0.07	0.26935	903.68	27.1961	4.18	0.86	6
2013-11-13	19:00:00																											77.94	0.08	0.257475	903.18	27.2404	4.08	0.97	6
2013-11-13	23:00:00																											239.31	0.22	0.25845	904.56	27.2742	3.98	0.92	6
2013-11-14	03:00:00																											214.68	0.15	0.26025	903.85	27.2198	4.06	0.87	34
2013-11-14	07:00:00																											113.85	0.05	0.259	903.64	27.2471	4.06	1.25	34
2013-11-14	11:00:00																											215.03	0.08	0.253975	905.16	27.2673	4	1.32	34
2013-11-14	15:00:00																											230.44	0.18	0.257825	904.03	27.2501	3.99	0.75	34
2013-11-14	19:00:00																											159.52	0.03	0.2557	902.83	27.2386	4.02	1.19	34
2013-11-14	23:00:00																											152.52	0.02	0.246625	904.38	27.248	3.95	1.37	34
2013-11-15	03:00:00																											110.72	0.04	0.250125	904.26	27.2613	3.96	1.37	82
2013-11-15	07:00:00																											218.22	0.08	0.253025	903.56	27.2533	3.9	1.39	82
2013-11-15	11:00:00																											223.67	0.14	0.25445	905.07	27.2603	3.93	1.48	82
2013-11-15	15:00:00																											147.95	0.08	0.25795	904.39	27.2259	4.04	1.92	82
2013-11-15	19:00:00																											78.99	0.11	0.252675	902.62	27.2268	4	1.3	82
2013-11-15	23:00:00																											118.63	0.07	0.24935	904.03	27.283	3.92	1.35	82
2013-11-16	03:00:00																											227.09	0.2	0.254675	904.53	27.2775	3.93	1.49	82
2013-11-16	07:00:00																											125.87	0.06	0.251725	903.53	27.2259	3.98	1.73	82
2013-11-16	11:00:00																											134.18	0.03	0.245075	904.87	27.2566	3.97	1.51	82
2013-11-16	15:00:00																											230.64	0.16	0.250525	904.73	27.2728	3.96	1.54	82
2013-11-16	19:00:00																											173.21	0.09	0.251125	902.6	27.2357	3.96	1.45	82
2013-11-16	23:00:00																											46.2	0.04	0.246725	903.64	27.2334	4.01	1.48	82
2013-11-17	03:00:00																											46.5	0.04	0.2474	904.72	27.261	3.94	1.52	-16
2013-11-17	07:00:00																											177.46	0.04	0.24875	903.65	27.2666	3.91	1.54	-16
2013-11-17	11:00:00																											222.95	0.12	0.250775	904.64	27.2631	3.94	1.75	-16
2013-11-17	15:00:00																											230.87	0.17	0.253125	905.01	27.2372	4.02	1.71	-16
2013-11-17	19:00:00																											123.23	0.03	0.253775	902.77	27.2032	4.06	1.52	-16
2013-11-17	23:00:00																											55.63	0.06	0.249225	903.3	27.2629	3.95	1.33	-16
2013-11-18	03:00:00																											144.37	0.08	0.2515	904.8	27.3007	3.89	1.48	-3
2013-11-18	07:00:00																											191.36	0.06	0.252875	903.82	27.2688	3.91	1.8	-3
2013-11-18	11:00:00																											130.66	0.05	0.250525	904.41	27.2584	3.9	1.46	-3
2013-11-18	15:00:00																											212.15	0.16	0.256875	905.18	27.2736	3.93	1.44	-3
2013-11-18	19:00:00																											185.05	0.1	0.2574	903.04	27.2361	4.02	1.6	-3
2013-11-18	23:00:00																											26.7	0.07	0.255725	902.97	27.2223	4.04	1.19	-3
2013-11-19	03:00:00																											41.8	0.09	0.251375	904.72	27.272	3.92	1.09	90
2013-11-19	07:00:00																											186.65	0.11	0.25365	904.02	27.2991	3.86	1.27	90
2013-11-19	11:00:00																											227.54	0.14	0.25395	904.16	27.2499	3.91	1.25	90
2013-11-19	15:00:00																											219.03	0.12	0.251875	905.16	27.2201	4.03	1.32	90
2013-11-19	19:00:00																											73.7	0.04	0.251425	903.35	27.2035	4.05	1.4	90
2013-11-19	23:00:00																											35.98	0.05	0.250525	902.74	27.2825	3.92	1.21	90
2013-11-20	03:00:00																											183.24	0.12	0.256	904.56	27.32	3.81	1.29	3
2013-11-20	07:00:00																											159.63	0.09	0.25485	904.22	27.2917	3.87	1.3	3
2013-11-20	11:00:00																											78.78	0.04	0.252625	903.99	27.2924	3.86	1.33	3
2013-11-20	15:00:00																											215.03	0.08	0.253175	905.08	27.2826	3.88	1.39	3
2013-11-20	19:00:00																											164.11	0.06	0.2509	903.72	27.2461	3.96	1.37	3
2013-11-20	23:00:00																											60.71	0.11	0.2531	902.68	27.267	3.83	1.21	3
2013-11-21	03:00:00																											149.03	0.08	0.2562	904.33	27.3268	3.8	1.8	-9
2013-11-21	07:00:00																											232.18	0.17	0.258475	904.41	27.3028	3.78	2.69	-9
2013-11-21	11:00:00																											185.02	0.11	0.2552	903.89	27.2671	3.82	2.59	-9
2013-11-21	15:00:00																											125.41	0.03	0.253925	904.91	27.263	3.84	3.07	-9
2013-11-21	19:00:00																											138.1	0.03	0.25135	904.05	27.2755	3.87	4.03	-9
2013-11-21	23:00:00																											75.17	0.08	0.2558	902.74	27.2836	3.79	2.13	-9
2013-11-22	03:00:00																											120.82	0.06	0.259025	904.09	27.3174	3.74	2.65	-79
2013-11-22	07:00:00																											205.51	0.1	0.25695	904.56	27.2925	3.78	5.23	-79
2013-11-22	11:00:00																											76.62	0.06	0.25505	903.9	27.2945	3.79	4.26	-79
2013-11-22	15:00:00																											165.73	0.13	0.253175	904.69	27.2734	3.84	2.35	-79
2013-11-22	19:00:00																											204.9	0.05	0.250075	904.3	27.2942	3.93	1.46	-79
2013-11-22	23:00:00																											33.8	0.12	0.25245	902.88	27.286	3.83	1.41	-79
2013-11-23	03:00:00																											113.25	0.14	0.2558	903.85	27.3046	3.77	1.4	-59
2013-11-23	07:00:00																											233.36	0.15	0.2612	904.66	27.3128	3.73	1.43	-59
2013-11-23	11:00:00																											219.13	0.15	0.259925	903.95	27.2894	3.74	1.43	-59
2013-11-23	15:00:00																											111.16	0.08	0.248975	904.41	27.2716	3.96	1.42	-59
2013-11-23	19:00:00																											134.01	0.03	0.247925	904.45	27.2606	3.88	1.47	-59
2013-11-23	23:00:00																											51.11	0.03	0.2466	903.12	27.2804	3.91	1.58	-59
2013-11-24	03:00:00																											109.1	0.05	0.253875	903.62	27.306	3.78	1.61	-32
2013-11-24	07:00:00																											240.28	0.06	0.256325	904.66	27.2922	3.79	4.17	-32
2013-11-24	11:00:00																											206.04	0.08	0.253175	904.06	27.299	3.83	1.63	-32
2013-11-24	15:00:00																											229.58	0.14	0.252575	904.13	27.273	3.86	1.72	-32
2013-11-24	19:00:00																											226.5	0.12	0.249725	904.48	27.2553	3.98	1.82	-32
2013-11-24	23:00:00																											97.02	0.08	0.247725	903.4	27.2373	3.97	1.83	-32
2013-11-25	03:00:00																											52.59	0.06	0.249975	903.47	27.2884	3.87	1.74	-69
2013-11-25	07:00:00																											216.57	0.11	0.252225	904.64	27.301	3.85	1.81	-69
2013-11-25	11:00:00																											235.18	0.19	0.25085	904.24	27.2733	3.9	1.58	-69
2013-11-25	15:00:00																											216.24	0.07	0.249625	903.88	27.2372	4.04	1.66	-69
2013-11-25	19:00:00																											234.23	0.04	0.248725	904.39	27.2366	4.07	1.74	-69
2013-11-25	23:00:00																											28.3	0.08	0.246675	903.73	27.2354	3.98	1.75	-69
2013-11-26	03:00:00																											91.96	0.03	0.25085	903.39	27.2954	3.89	1.88	-121
2013-11-26	07:00:00																											209.32	0.06	0.250875	904.55	27.2877	3.9	2.56	-121
2013-11-26	11:00:00																											172.98	0.07	0.250125	904.47	27.2511	3.93	1.9	-121
2013-11-26	15:00:00																											103.01	0.04	0.248425	903.68	27.2715	3.95	1.84	-121
2013-11-26	19:00:00																											247.03	0.06	0.251425	904.2	27.2527	4.02	1.79	-121
2013-11-26	23:00:00																											115.79	0.07	0.249025	904.05	27.2406	3.94	1.75	-121
2013-11-27	03:00:00																											83.84	0.06	0.250425	903.42	27.2809	3.87	1.81	-81
2013-11-27	07:00:00																											221.52	0.12	0.25195	904.43	27.2896	3.86	2.68	-81
2013-11-27	11:00:00																											189.19	0.08	0.251425	904.74	27.2696	3.9	2.2	-81
2013-11-27	15:00:00																											65.01	0.08	0.250175	903.58	27.245	4	2.12	-81
2013-11-27	19:00:00																											42.23	0.09	0.24795	903.89	27.2762	3.88	2.5	-81
2013-11-27	23:00:00																											152.46	0.03	0.24845	904.31	27.2735	3.91	1.73	-81
2013-11-28	03:00:00																											130.75	0.1	0.249075	903.54	27.2765	3.89	1.8	3
2013-11-28	07:00:00																											91.67	0.05	0.2482	904.25	27.2492	3.89	1.49	3
2013-11-28	11:00:00																											211.45	0.08	0.248025	904.95	27.2612	3.93	1.52	3
2013-11-28	15:00:00																											85.94	0.05	0.2464	903.59	27.2584	3.96	1.29	3
2013-11-28	19:00:00																											36.97	0.17	0.24505	903.49	27.261	3.94	1.78	3
2013-11-28	23:00:00																											82.2	0.05	0.247375	904.43	27.2808	3.86	1.49	3
2013-11-29	03:00:00																											124.28	0.06	0.24695	903.72	27.284	3.89	1.81	4
2013-11-29	07:00:00																											167.36	0.1	0.24825	904.02	27.271	3.88	2.65	4
2013-11-29	11:00:00																											246.88	0.06	0.2457	905.13	27.2607	3.94	1.85	4
2013-11-29	15:00:00																											187.26	0.07	0.243175	903.72	27.2538	3.97	1.5	4
2013-11-29	19:00:00																											167.99	0.08	0.244875	903.03	27.275	3.89	1.36	4
2013-11-29	23:00:00																											218.29	0.04	0.24465	904.4	27.2828	3.89	1.55	4
2013-11-30	03:00:00																											244.94	0.16	0.248725	904	27.2819	3.84	1.22	-26
2013-11-30	07:00:00																											248.99	0.08	0.2472	903.83	27.2552	3.88	1.37	-26
2013-11-30	11:00:00																											221.97	0.06	0.24375	905.24	27.2516	3.93	1.56	-26
2013-11-30	15:00:00																											257.98	0.09	0.2445	904.03	27.2571	3.97	1.34	-26
2013-11-30	19:00:00																											194.56	0.04	0.2432	902.64	27.2358	3.95	1.44	-26
2013-11-30	23:00:00																											299.84	0.04	0.243575	904.21	27.2879	3.9	1.51	-26
2013-12-01	03:00:00																											236.88	0.21	0.248425	904.34	27.2903	3.87	0.54	91
2013-12-01	07:00:00																													0.246125	903.68	27.252			91
2013-12-01	11:00:00																													0.243325	905.22	27.2656			91
2013-12-01	15:00:00																											177.1	0.06	0.24565	904.47	27.2479	3.95	1.8	91
2013-12-01	19:00:00																											91.48	0.06	0.242625	902.4	27.254	3.98	1.41	91
2013-12-01	23:00:00																											186.63	0.04	0.2443	903.84	27.2926	3.89	1.92	91
2013-12-02	03:00:00																											242.96	0.15	0.248775	904.63	27.3018	3.88	2.31	51
2013-12-02	07:00:00																											184.3	0.06	0.24555	903.6	27.2688	3.9	2.59	51
2013-12-02	11:00:00																											257.15	0.05	0.24375	905.02	27.2721	3.94	2.02	51
2013-12-02	15:00:00																											220.75	0.13	0.24635	904.95	27.2539	3.97	1.4	51
2013-12-02	19:00:00																											336.01	0.08	0.246025	902.39	27.2303	3.99	1.06	51
2013-12-02	23:00:00																											26.99	0.09	0.2479	903.34	27.2913	3.83	1.07	51
2013-12-03	03:00:00																											243.12	0.19	0.2516	904.84	27.3215	3.79	2.38	-7
2013-12-03	07:00:00																											246.95	0.19	0.247875	903.68	27.2832	3.89	2.28	-7
2013-12-03	11:00:00																											171.42	0.04	0.24615	904.69	27.2728	3.91	1.44	-7
2013-12-03	15:00:00																											230.32	0.12	0.24715	905.34	27.2945	3.89	1.59	-7
2013-12-03	19:00:00	14	1	0	0	1	0	0	0	0	0	0	0	0	0	0	3	1	0	0	0	0	0	0	0	0	0	206.49	0.08	0.246625	902.63	27.2466	4	1.17	-7
2013-12-03	23:00:00	10	1	1	0	0	1	0	0	0	0	0	0	0	0	0	4	0	0	0	0	0	1	0	0	0	2	196.01	0.08	0.25135	902.81	27.2745	3.82	3.64	-7
2013-12-04	03:00:00	7	0	0	0	0	0	0	0	0	0	0	0	0	0	0	0	0	0	0	0	0	0	0	0	0	0	240.83	0.16	0.254425	904.87	27.3265	3.79	1.97	-15
2013-12-04	07:00:00	13	0	3	0	0	1	0	0	0	0	0	0	0	0	0	0	1	0	0	0	0	0	0	0	0	0	232.52	0.2	0.255275	903.88	27.2917	3.78	1.42	-15
2013-12-04	11:00:00	1	0	0	0	0	0	0	0	0	0	0	0	0	0	0	0	0	0	0	0	0	0	0	0	0	0	250.13	0.05	0.250475	904.24	27.2827	3.84	1.73	-15
2013-12-04	15:00:00	12	0	1	0	0	2	2	0	0	0	0	0	0	0	0	0	0	0	0	0	0	1	0	0	0	0	237.15	0.16	0.249825	905.52	27.2823	3.94	1.87	-15
2013-12-04	19:00:00	11	0	0	0	0	2	2	0	0	0	0	0	0	0	1	4	0	0	0	0	0	0	0	0	0	0	288.5	0.04	0.247075	903.12	27.2618	3.95	1.92	-15
2013-12-04	23:00:00	10	0	2	0	0	0	1	0	0	0	0	0	0	0	0	0	0	0	0	0	0	1	0	0	0	0	208.87	0.07	0.2522	902.39	27.2719	3.84	2.09	-15
2013-12-05	03:00:00	11	1	2	0	1	0	1	0	0	0	0	0	0	0	0	0	0	0	0	0	0	2	0	0	0	0	220.51	0.15	0.257075	904.71	27.3266	3.78	1.81	-59
2013-12-05	07:00:00	9	1	5	0	0	1	0	0	0	0	0	0	0	0	0	0	0	0	0	0	0	0	0	0	0	0	224.91	0.12	0.2568	904.19	27.2972	3.82	1.29	-59
2013-12-05	11:00:00	10	1	1	0	0	0	1	0	0	0	0	0	0	0	0	1	0	0	0	0	0	0	0	0	0	0	216.15	0.03	0.2538	903.84	27.2886	3.8	1.85	-59
2013-12-05	15:00:00	9	0	0	0	1	1	0	0	0	0	0	0	0	0	0	1	0	0	0	0	0	0	0	0	0	0	240.55	0.16	0.2555	905.41	27.3118	3.81	1.42	-59
2013-12-05	19:00:00	10	1	3	0	1	9	1	0	0	0	0	0	0	0	0	0	1	0	0	0	1	0	0	0	0	0	281.56	0.14	0.251275	903.71	27.2721	3.96	1.77	-59
2013-12-05	23:00:00	11	0	0	0	0	1	0	0	0	0	0	0	0	2	0	2	0	0	0	0	0	0	0	0	0	3	264.1	0.1	0.254175	902.21	27.2727	3.82	2.43	-59
2013-12-06	03:00:00	10	0	2	0	0	0	0	0	0	0	0	0	0	0	0	1	0	0	0	0	0	0	0	0	0	0	177.64	0.11	0.257025	904.38	27.3103	3.76	1.52	-105
2013-12-06	07:00:00	6	0	1	0	0	1	1	0	0	0	0	0	0	0	0	0	0	0	0	0	0	0	0	0	0	0	235.05	0.29	0.262425	904.53	27.3213	3.72	1.14	-105
2013-12-06	11:00:00	9	0	3	0	0	0	0	0	0	0	0	0	0	0	0	0	0	0	0	0	0	0	0	0	0	0	299.42	0.07	0.256875	903.6	27.2865	3.81	0.97	-105
2013-12-06	15:00:00	5	0	0	0	0	0	0	0	0	0	0	0	0	0	0	4	0	0	0	0	0	0	0	0	0	0	164.68	0.05	0.258475	905.05	27.304	3.76	1.23	-105
2013-12-06	19:00:00																											233.26	0.17	0.25495	904.28	27.3025	3.87	1.15	-105
2013-12-06	23:00:00	9	2	1	0	0	0	0	0	0	0	0	0	0	0	0	0	0	0	0	0	0	0	0	0	0	0	332.87	0.07	0.2566	902.33	27.2862	3.81	2	-105
2013-12-07	03:00:00	9	2	0	0	0	1	2	0	0	0	0	0	0	0	0	0	0	0	0	0	0	2	0	0	0	0	152.27	0.09	0.264725	903.99	27.3154	3.69	1.24	-12
2013-12-07	07:00:00	8	0	2	0	0	0	0	0	0	0	0	0	0	0	0	0	0	0	0	0	0	0	0	0	0	0	241.35	0.19	0.264025	904.84	27.3187	3.71	1.68	-12
2013-12-07	11:00:00	10	0	4	0	0	0	1	0	0	0	0	0	0	0	0	0	0	0	0	0	0	0	0	0	0	0	234.83	0.17	0.2612	903.61	27.2916	3.73	4.61	-12
2013-12-07	15:00:00	5	0	0	0	0	3	1	0	0	0	0	0	0	0	0	2	0	0	0	0	0	0	0	0	0	0	260.26	0.06	0.2548	904.53	27.2881	3.81	1.62	-12
2013-12-07	19:00:00	9	0	1	0	0	1	1	0	0	0	0	0	0	0	0	1	0	0	0	0	0	1	0	0	0	0	202.08	0.04	0.2563	904.62	27.2953	3.77	2.11	-12
2013-12-07	23:00:00	8	1	1	0	0	1	0	0	0	0	0	0	0	0	0	0	0	0	0	0	0	0	0	0	0	0	94.15	0.05	0.25915	902.69	27.3042	3.73	2.58	-12
2013-12-08	03:00:00	10	0	1	0	0	2	3	0	0	0	0	0	0	0	1	0	0	0	0	0	0	0	0	0	0	1	226.56	0.11	0.26365	903.6	27.3358	3.7	2.85	-4
2013-12-08	07:00:00	12	1	1	0	0	1	2	0	0	0	0	0	0	0	0	1	0	0	0	0	0	1	0	0	0	0	248.17	0.1	0.263625	904.98	27.3218	3.7	1.75	-4
2013-12-08	11:00:00	5	0	0	0	0	0	0	0	0	0	0	0	0	0	0	0	0	0	0	0	0	0	0	0	0	0	242.71	0.07	0.262375	903.81	27.3005	3.71	1.74	-4
2013-12-08	15:00:00	9	1	0	0	0	2	1	0	0	0	0	0	0	0	0	0	0	0	0	1	0	0	0	0	0	0	217.12	0.08	0.2586	903.98	27.2944	3.76	1.09	-4
2013-12-08	19:00:00	9	2	0	0	1	12	0	0	0	0	1	0	0	0	0	0	0	0	0	0	0	1	0	0	0	0	275.82	0.06	0.2575	904.7	27.2835	3.77	1.45	-4
2013-12-08	23:00:00																											197.45	0.03	0.255525	903.19	27.3117	3.76	1.75	-4
2013-12-08	03:00:00																											240.49	0.06	0.259125	903.34	27.3252	3.72	1.56	4
2013-12-09	07:00:00	5	0	1	0	0	0	0	0	0	0	0	0	0	0	0	0	0	0	0	0	0	0	0	0	0	0	232.36	0.1	0.26425	904.97	27.3172	3.71	1.34	4
2013-12-09	11:00:00	5	0	1	0	0	0	0	0	0	0	0	0	0	0	0	1	0	0	0	0	0	0	0	0	0	0	230.71	0.13	0.259325	904.16	27.302	3.73	1.14	4
2013-12-09	15:00:00																											218.16	0.14	0.252725	903.56	27.2769	3.86	0.84	4
2013-12-09	19:00:00																											292.7	0.06	0.250675	904.51	27.2707	3.87	1.21	4
2013-12-09	23:00:00																											169.87	0.03	0.25135	903.71	27.2761	3.82	1.27	4
2013-12-10	03:00:00																											261.69	0.04	0.2574	903.24	27.322	3.78	1.26	-14
2013-12-10	07:00:00																											164.38	0.09	0.258175	904.8	27.309	3.74	1.06	-14
2013-12-10	11:00:00																											240.24	0.11	0.255025	904.55	27.31	3.84	0.87	-14
2013-12-10	15:00:00																											220.64	0.07	0.255975	903.33	27.2746	3.81	1	-14
2013-12-10	19:00:00																											282.78	0.05	0.2502	904.11	27.2564	3.93	1.28	-14
2013-12-10	23:00:00																											197.88	0.04	0.254175	904.12	27.3107	3.8	1.45	-14
2013-12-11	03:00:00																											221.65	0.11	0.259775	903.34	27.3267	3.74	1.26	-83
2013-12-11	07:00:00																											243.77	0.14	0.25695	904.55	27.2963	3.82	1.23	-83
2013-12-11	11:00:00																											182.28	0.13	0.254975	904.87	27.2984	3.81	5.21	-83
2013-12-11	15:00:00																											215.98	0.05	0.251725	903.31	27.2596	3.87	1.15	-83
2013-12-11	19:00:00																											150.84	0.03	0.253275	903.65	27.2819	3.84	1.46	-83
2013-12-11	23:00:00																											211.65	0.03	0.255125	904.36	27.3041	3.79	1.53	-83
2013-12-12	03:00:00																											188.61	0.08	0.255075	903.58	27.3165	3.82	1.46	-96
2013-12-12	07:00:00																											242.41	0.14	0.258225	904.28	27.2946	3.81	1.11	-96
2013-12-12	11:00:00																											237.93	0.11	0.25285	905.11	27.2726	3.9	1.04	-96
2013-12-12	15:00:00																											167.85	0.04	0.25235	903.5	27.286	3.87	1.37	-96
2013-12-12	19:00:00																											105.08	0.05	0.2511	903.18	27.2522	3.9	1.97	-96
2013-12-12	23:00:00																											266.53	0.06	0.256175	904.4	27.3124	3.8	1.44	-96
2013-12-13	03:00:00																											244.69	0.17	0.25795	903.87	27.3218	3.77	1.12	-5
2013-12-13	07:00:00																											235.46	0.14	0.25945	904.04	27.2893	3.81	0.99	-5
2013-12-13	11:00:00																											208.1	0.06	0.25285	905.19	27.2757	3.87	1.26	-5
2013-12-13	15:00:00																											191.07	0.05	0.25095	903.82	27.275	3.94	1.24	-5
2013-12-13	19:00:00																											144.13	0.03	0.25255	902.86	27.2837	3.87	1.49	-5
2013-12-13	23:00:00																											185.8	0.13	0.255	904.28	27.2898	3.81	1.15	-5
2013-12-14	03:00:00																											224.25	0.09	0.253175	904.18	27.2832	3.88	1.11	-63
2013-12-14	07:00:00																											159.42	0.06	0.252675	903.88	27.2713	3.91	1.1	-63
2013-12-14	11:00:00																											180.36	0.06	0.254375	905.17	27.2822	3.83	1.26	-63
2013-12-14	15:00:00																											163.97	0.06	0.25025	904.18	27.2734	4.01	1.44	-63
2013-12-14	19:00:00																											58.46	0.06	0.2496	902.65	27.2753	3.92	1.4	-63
2013-12-14	23:00:00																											181.83	0.11	0.254575	904.04	27.2757	3.8	1.17	-63
2013-12-15	03:00:00																											246.97	0.1	0.252425	904.44	27.263	3.92	1.03	19
2013-12-15	07:00:00																											259.4	0.01	0.2499	903.8	27.2631	3.9	1.29	19
2013-12-15	11:00:00																											193.72	0.03	0.248225	905.03	27.2831	3.91	1.35	19
2013-12-15	15:00:00																											214.86	0.06	0.249125	904.55	27.2638	3.94	1.22	19
2013-12-15	19:00:00																											237.89	0.03	0.2493	902.62	27.2767	3.93	1.48	19
2013-12-15	23:00:00																											113.49	0.07	0.251275	903.72	27.2804	3.85	1.25	19
2013-12-16	03:00:00																											235.51	0.19	0.252525	904.62	27.2539	3.92	0.72	-3
2013-12-16	07:00:00																											286.87	0.07	0.250675	903.8	27.2364	3.97	1.19	-3
2013-12-16	11:00:00																											165.8	0.07	0.2482	904.83	27.2662	3.92	1.33	-3
2013-12-16	15:00:00																											227.34	0.15	0.254275	904.85	27.2546	4.04	0.76	-3
2013-12-16	19:00:00																											275.45	0.08	0.250975	902.72	27.2683	3.98	1.24	-3
2013-12-16	23:00:00																											156.66	0.07	0.254625	903.39	27.2765	3.81	2.47	-3
2013-12-17	03:00:00																											233.17	0.18	0.25405	904.72	27.2736	3.93		26
2013-12-17	07:00:00																											240.16	0.06	0.250375	903.88	27.2843	3.92	1.39	26
2013-12-17	11:00:00																											111.39	0.03	0.24905	904.59	27.2828	3.87	1.4	26
2013-12-17	15:00:00																											238.74	0.14	0.254225	905.05	27.2751	3.83	1.3	26
2013-12-17	19:00:00																											93.63	0.03	0.25125	902.91	27.275	3.93	1.4	26
2013-12-17	23:00:00																											70.66	0.05	0.251125	903.09	27.2758	3.8	1.6	26
2013-12-18	03:00:00																											185.99	0.06	0.251275	904.73	27.2879	3.8	1.98	73
2013-12-18	07:00:00																											212.45	0.11	0.25165	903.99	27.2705	3.85	1.99	73
2013-12-18	11:00:00																											122.62	0.02	0.249075	904.33	27.2669	3.9	3.83	73
2013-12-18	15:00:00																											109.42	0.04	0.250925	905.13	27.2537	3.81	1.9	73
2013-12-18	19:00:00																											62.36	0.05	0.248725	903.19	27.2611	3.9	1.71	73
2013-12-18	23:00:00																											66.16	0.03	0.24755	902.86	27.2898	3.84	1.92	73
2013-12-19	03:00:00																											232.39	0.12	0.2528	904.63	27.2834	3.82	1.81	-4
2013-12-19	07:00:00																											175.07	0.06	0.2506	904.13	27.2678	3.87	1.99	-4
2013-12-19	11:00:00																											215.34	0.05	0.251175	904.08	27.2752	3.85	2.07	-4
2013-12-19	15:00:00																											158.34	0.03	0.2503	905.1	27.2622	3.88	2.62	-4
2013-12-19	19:00:00																											86.23	0.05	0.252275	903.49	27.2465	3.95	2.82	-4
2013-12-19	23:00:00																											59.61	0.06	0.24935	902.72	27.2937	3.85	2.32	-4
2013-12-20	03:00:00																											189.85	0.04	0.2531	904.49	27.2913	3.78	2.6	1
2013-12-20	07:00:00																											202.53	0.08	0.252275	904.3	27.2761	3.84	2.78	1
2013-12-20	11:00:00																											192.5	0.07	0.25055	903.92	27.2764	3.89	2.67	1
2013-12-20	15:00:00																											205.52	0.05	0.2495	904.99	27.2802	3.89	2.56	1
2013-12-20	19:00:00																											145.81	0.07	0.250725	903.83	27.2368	3.97	2.53	1
2013-12-20	23:00:00																											31.08	0.06	0.248975	902.71	27.2785	3.88	2.6	1
2013-12-21	03:00:00																											238.01	0.12	0.257275	904.32	27.3009	3.75	3.48	10
2013-12-21	07:00:00																											241.88	0.09	0.25165	904.47	27.2635	3.89	3.2	10
2013-12-21	11:00:00																											58.28	0.01	0.24945	903.82	27.2764	3.92	3.19	10
2013-12-21	15:00:00																											147.36	0.04	0.2494	904.78	27.2762	3.88	3.09	10
2013-12-21	19:00:00																											147.6	0.04	0.2512	904.11	27.2314	4	2.64	10
2013-12-21	23:00:00																											37.96	0.08	0.247875	902.79	27.2855	3.92	2.15	10
2013-12-22	03:00:00																											117	0.03	0.251225	904.13	27.298	3.8	2.43	-19
2013-12-22	07:00:00																											235.54	0.08	0.25105	904.64	27.2905	3.83	2.46	-19
2013-12-22	11:00:00																											164.93	0.06	0.24925	903.78	27.2673	3.9	2.42	-19
2013-12-22	15:00:00																											174.87	0.03	0.248975	904.51	27.279	3.89	2.65	-19
2013-12-22	19:00:00																											160.4	0.02	0.246175	904.33	27.2652	3.87	2.62	-19
2013-12-22	23:00:00																											69.18	0.03	0.24495	902.97	27.2849	3.86	2.58	-19
2013-12-23	03:00:00																											203.67	0.07	0.249425	903.94	27.2861	3.82	2.5	56
2013-12-23	07:00:00																											171.72	0.05	0.249025	904.77	27.2608	3.85	2.4	56
2013-12-23	11:00:00																											185.72	0.03	0.2465	903.86	27.2702	3.91	2.82	56
2013-12-23	15:00:00																											216.37	0.08	0.25045	904.22	27.2781	3.84	2.66	56
2013-12-23	19:00:00																											165.05	0.07	0.24885	904.43	27.2429	3.88	2.63	56
2013-12-23	23:00:00																											45.3	0.03	0.246125	903.21	27.2711	3.89	2.98	56
2013-12-24	03:00:00																											109.69	0.02	0.246325	903.77	27.2916	3.85	2.98	-3
2013-12-24	07:00:00																											234.06	0.13	0.250775	904.85	27.2851	3.84	2.71	-3
2013-12-24	11:00:00																											249.05	0.07	0.247025	904.01	27.2529	3.93	2.85	-3
2013-12-24	15:00:00																											142.08	0.02	0.24455	903.9	27.2491	3.95	3.08	-3
2013-12-24	19:00:00																											128.67	0.04	0.24705	904.4	27.2833	3.88	2.96	-3
2013-12-24	23:00:00																											165.28	0.02	0.245375	903.49	27.276	3.89	3.14	-3
2013-12-25	03:00:00																											235.07	0.05	0.24965	903.63	27.274	3.86	3.15	-7
2013-12-25	07:00:00																											202.92	0.07	0.249225	904.84	27.2706	3.88	3.02	-7
2013-12-25	11:00:00																											194.65	0.04	0.247075	904.22	27.2565	3.89	2.91	-7
2013-12-25	15:00:00																											185.77	0.05	0.24655	903.6	27.2696	3.92	3.13	-7
2013-12-25	19:00:00																											58.4	0.04	0.24545	904.24	27.276	3.92	3.05	-7
2013-12-25	23:00:00																											195.7	0.02	0.2451	903.79	27.274	3.9	3.19	-7
2013-12-26	03:00:00																											229.18	0.06	0.24625	903.57	27.2924	3.87	3.18	-14
2013-12-26	07:00:00																											230.39	0.13	0.25	904.8	27.2684	3.85	2.68	-14
2013-12-26	11:00:00																											203.21	0.03	0.244675	904.51	27.2499	3.93	2.87	-14
2013-12-26	15:00:00																											74.25	0.04	0.243575	903.41	27.2694	3.95	2.53	-14
2013-12-26	19:00:00																											155.15	0.02	0.243775	903.96	27.2879	3.9	3	-14
2013-12-26	23:00:00																											102.3	0.03	0.24255	904.08	27.264	3.93	2.83	-14
2013-12-27	03:00:00																											212.75	0.07	0.24665	903.59	27.2565	3.91	2.85	57
2013-12-27	07:00:00																											197.19	0.04	0.247625	904.65	27.2619	3.97	2.77	57
2013-12-27	11:00:00																											158.03	0.03	0.246225	904.83	27.2463	4	2.8	57
2013-12-27	15:00:00																											120.67	0.03	0.243925	903.35	27.2497	3.98	2.75	57
2013-12-27	19:00:00																											186.55	0.04	0.2429	903.57	27.2643	3.95	3.15	57
2013-12-27	23:00:00																											210.56	0.04	0.24575	904.29	27.2418	3.91	3.11	57
2013-12-28	03:00:00																											198.44	0.06	0.24535	903.72	27.2534	3.93	2.71	4
2013-12-28	07:00:00																											219.91	0.12	0.247725	904.46	27.2512	3.98	2.43	4
2013-12-28	11:00:00																											157.4	0.04	0.249525	905.14	27.2193	4.04	2.8	4
2013-12-28	15:00:00																											125.22	0.02	0.25165	903.46	27.2192	4.11	2.85	4
2013-12-28	19:00:00																											57.77	0.03	0.24665	903.11	27.2596	4.01	2.77	4
2013-12-28	23:00:00																											244.15	0.04	0.246625	904.36	27.2548	3.95	2.69	4
2013-12-29	03:00:00																											201.34	0.11	0.248625	903.94	27.2416	3.99	2.69	1
2013-12-29	07:00:00																											160.15	0.04	0.251575	904.2	27.2478	4.07	2.93	1
2013-12-29	11:00:00																											210.35	0.05	0.249725	905.35	27.2387	3.99	2.82	1
2013-12-29	15:00:00																											138.5	0.02	0.254725	903.78	27.2103	4.11	2.96	1
2013-12-29	19:00:00																											140.6	0.05	0.25005	902.68	27.2546	4.04	2.69	1
2013-12-29	23:00:00																											171.03	0.02	0.246775	904.27	27.2633	3.95	2.97	1
2013-12-30	03:00:00																											160.34	0.03	0.247525	904.25	27.2544	3.95	2.8	4
2013-12-30	07:00:00																											192.02	0.08	0.2528	903.96	27.2556	4.05	2.64	4
2013-12-30	11:00:00																											169.25	0.08	0.2534	905.42	27.2222	4.06	2.71	4
2013-12-30	15:00:00																											107.15	0.04	0.2497	904.26	27.239	4.04	2.73	4
2013-12-30	19:00:00																											32.65	0.05	0.24575	902.38	27.2439	3.96	2.54	4
2013-12-30	23:00:00																											207.36	0.08	0.24755	903.96	27.283	3.9	2.69	4
2013-12-31	03:00:00																											203.48	0.05	0.2487	904.56		3.87	2.91	-1
2013-12-31	07:00:00																											215.58	0.06	0.250675	903.73		3.98	2.77	-1
2013-12-31	11:00:00																											188.98	0.1	0.247175	905.26	27.262	3.94	2.58	-1
2013-12-31	15:00:00																											248.86	0.07	0.2486	904.83	27.234	4.01	1.68	-1
2013-12-31	19:00:00																											211.24	0.02	0.248175	902.31		4.01	2.13	-1
2013-12-31	23:00:00																											191.95	0.09	0.246825	903.5	27.2697	3.95	1.57	-1
2014-01-01	03:00:00																											239.06	0.09	0.246775	904.83	27.2664	3.93	1.31	-38
2014-01-01	07:00:00																											173.29	0.08	0.245675	903.7	27.25	3.91	1.68	-38
2014-01-01	11:00:00																											231.32	0.2	0.2479	904.88	27.2425	3.98	0.74	-38
2014-01-01	15:00:00	13	5	1	0	0	0	0	0	0	0	0	0	0	0	0	0	0	0	0	0	0	1	0	0	0	0	234.28	0.17	0.25505	905.31	27.2324	4.08	1.63	-38
2014-01-01	19:00:00	11	3	0	0	1	9	1	0	0	0	0	0	0	0	0	0	0	0	0	1	0	0	0	0	0	0	304.42	0.07	0.25385	902.52	27.2108	4.1	3.6	-38
2014-01-01	23:00:00	9	1	0	0	0	0	0	0	0	0	0	0	0	0	0	0	0	0	0	0	0	0	0	0	0	0	35.8	0.06	0.245275	902.98	27.2554	3.99	2.56	-38
2014-01-02	03:00:00	14	2	0	0	1	1	0	0	0	0	0	0	0	0	0	0	0	0	0	0	0	0	0	0	0	0	187.43	0.2	0.245275	904.98	27.2664	3.91	1.42	38
2014-01-02	07:00:00	14	2	0	0	0	0	0	0	0	0	0	0	0	0	0	0	0	0	1	0	0	0	0	0	0	0	236.25	0.24	0.250425	903.82	27.2538	3.99	1.09	38
2014-01-02	11:00:00	21	2	1	0	1	0	0	0	0	0	0	0	0	0	0	1	1	0	0	0	0	0	0	0	0	0	237.13	0.18	0.2536	904.34	27.2387	4.05	1.46	38
2014-01-02	15:00:00	14	0	0	1	0	6	0	0	0	0	0	0	0	0	0	1	0	0	0	0	0	1	0	0	0	0	233.04	0.18	0.26105	905.56	27.1932	4.13	1.22	38
2014-01-02	19:00:00	12	0	1	0	0	0	0	0	0	0	0	0	0	0	0	0	0	0	0	0	0	0	0	0	0	0	263.21	0.12	0.27095	902.99	27.1677	4.23	1.12	38
2014-01-02	23:00:00	6	0	0	0	0	0	0	0	0	0	0	0	0	0	0	1	0	0	2	0	0	0	0	0	0	1	14.9	0.06	0.25865	902.57	27.2325	4.13	1.86	38
2014-01-03	03:00:00	9	0	0	0	0	0	0	0	0	0	0	0	0	0	0	0	0	0	0	0	0	0	0	0	0	0	161.87	0.07	0.25325	904.94	27.2734	4.07	2.11	54
2014-01-03	07:00:00	8	0	2	0	0	0	0	0	0	0	0	0	0	0	0	0	0	0	1	0	0	0	0	0	0	0	237.05	0.15	0.2597	904.09	27.2522	4.12	1.93	54
2014-01-03	11:00:00	15	0	2	0	0	1	0	0	0	0	0	0	0	1	0	0	1	0	0	0	0	3	0	0	0	0	155.93	0.03	0.254475	903.81	27.2477	4.09	2.96	54
2014-01-03	15:00:00	11	0	1	0	0	3	0	0	0	0	0	0	0	0	0	0	0	0	0	0	0	0	0	0	0	0	181.55	0.04	0.2474	905.48	27.2611	4.05	2.21	54
2014-01-03	19:00:00	13	1	1	0	0	3	0	0	0	0	0	0	0	0	0	0	0	0	1	0	0	0	0	0	0	0	73.9	0.05	0.251075	903.61	27.2518	4.04	2.24	54
2014-01-03	23:00:00	12	0	0	0	0	1	0	0	0	0	0	0	0	0	0	0	0	0	2	0	0	0	0	0	0	0	87.99	0.06	0.244475	902.36	27.2742	3.89	2.5	54
2014-01-04	03:00:00	11	0	0	0	0	0	0	0	0	0	0	0	0	0	0	1	0	0	0	0	0	0	0	0	0	1	232.27	0.2	0.248275	904.74	27.2863	3.87	1.56	-11
2014-01-04	07:00:00	12	0	0	0	0	1	0	0	0	0	0	0	0	0	0	1	0	0	0	0	0	0	0	0	0	1	237.25	0.24	0.247075	904.49	27.2717	3.86	1.29	-11
2014-01-04	11:00:00	12	1	0	0	0	0	0	0	0	0	0	0	0	0	0	6	0	0	0	0	0	0	0	0	0	0	196.7	0.04	0.247975	903.48	27.2347	3.95	1.68	-11
2014-01-04	15:00:00	13	0	0	0	0	6	0	0	0	0	0	0	0	0	1	2	0	0	0	0	0	0	0	0	0	0	240.62	0.14	0.248325	905.13	27.2493	3.97	2.43	-11
2014-01-04	19:00:00	12	1	0	0	0	11	0	0	0	0	0	0	0	0	0	0	0	0	0	0	0	0	0	0	0	0	237.2	0.13	0.250875	904.18	27.2415	4.02	2.02	-11
2014-01-04	23:00:00	13	1	1	0	0	0	0	0	0	0	0	0	0	0	0	0	0	0	0	0	0	0	0	0	0	0	192.19	0.06	0.25345	902.42	27.2234	4.06	2.13	-11
2014-01-05	03:00:00	12	2	1	0	0	0	0	0	0	0	0	0	0	0	0	0	0	0	0	0	0	0	0	0	0	0	207.64	0.04	0.24655	904.41	27.2497	3.96	2.27	-107
2014-01-05	07:00:00	12	0	2	0	0	11	0	0	0	0	0	0	0	0	0	0	0	0	0	0	0	0	0	0	0	1	223.02	0.12	0.25	904.88	27.2486	4.02	1.36	-107
2014-01-05	11:00:00	6	0	1	0	0	3	0	0	0	0	0	0	0	0	0	0	0	0	0	0	0	0	0	0	0	0	239.39	0.08	0.25525	903.41	27.2255	4.1	1.9	-107
2014-01-05	15:00:00	10	0	0	0	0	7	1	0	0	0	0	0	0	0	0	1	0	0	0	0	0	0	0	0	0	0	129.38	0.03	0.252125	904.6	27.2352	4.06	2.7	-107
2014-01-05	19:00:00	12	1	1	0	0	1	0	0	0	0	0	0	0	0	0	0	1	0	0	1	0	1	0	0	0	0	251.25	0.04	0.248825	904.57	27.2204	4.07	2.46	-107
2014-01-05	23:00:00	20	0	0	0	0	2	0	0	0	0	0	0	0	0	0	0	0	0	0	1	0	0	0	0	0	0	127.49	0.05	0.249175	902.71	27.2731	4.03	2.81	-107
2014-01-06	03:00:00	10	1	1	0	0	1	0	0	0	0	0	0	0	0	0	0	0	0	0	0	0	0	0	0	0	0	240.98	0.16	0.25015	904.05	27.2795	3.91	2.49	-85
2014-01-06	07:00:00	12	0	6	0	0	2	0	0	0	0	0	0	0	0	0	0	0	0	0	0	0	0	0	0	0	0	231.59	0.13	0.249825	905.12	27.2535	3.89	1.41	-85
2014-01-06	11:00:00	11	0	0	0	0	0	0	0	0	0	0	0	0	0	0	3	0	0	0	0	0	0	0	0	0	0	241.28	0.15	0.254625	903.55	27.2399	4.03	1.55	-85
2014-01-06	15:00:00	11	0	0	0	0	0	0	0	0	0	0	0	0	0	0	0	0	0	0	0	0	0	0	0	0	0	99.62	0.08	0.251275	904.01	27.248	4.02	1.72	-85
2014-01-06	19:00:00																											227.66	0.19	0.256875	904.67	27.218	4.08	0.75	-85
2014-01-06	23:00:00																											246.1	0.07	0.261725	903.14	27.2028	4.15	1.54	-85
2014-01-07	03:00:00																											205.23	0.04	0.25365	903.75	27.2058	4.06	1.8	-62
2014-01-07	07:00:00																											158.95	0.03	0.2518	905.18	27.2648	4.07	1.97	-62
2014-01-07	11:00:00																											241.14	0.17	0.259775	903.89	27.242	4.11	1.17	-62
2014-01-07	15:00:00																											224.33	0.09	0.268675	903.54	27.2621	4.21	1.4	-62
2014-01-07	19:00:00																											165.46	0.04	0.261875	904.51	27.2383	4.13	1.8	-62
2014-01-07	23:00:00																											217.02	0.03	0.25645	903.59	27.2208	4.12	1.69	-62
2014-01-08	03:00:00																											237.33	0.11	0.26155	903.59	27.2392	4.17	1.58	-51
2014-01-08	07:00:00																											216.9	0.12	0.258675	905.06	27.2198	4.06	1.14	-51
2014-01-08	11:00:00																											225.9	0.04	0.264175	904.29	27.2122	4.13	1.78	-51
2014-01-08	15:00:00																											267.61	0.07	0.268875	903.26	27.1983	4.16	1.72	-51
2014-01-08	19:00:00																											233.5	0.04	0.261675	904.14	27.2188	4.09	1.92	-51
2014-01-08	23:00:00																											177.36	0.04	0.254725	903.97	27.2687	4.03	2.26	-51
2014-01-09	03:00:00																											193.38	0.04	0.253975	903.59	27.2746	4	2.53	-48
2014-01-09	07:00:00																											231.47	0.06	0.25165	904.84	27.2714	3.95	2.09	-48
2014-01-09	11:00:00																											216.1	0.06	0.252625	904.65	27.2617	3.98	2.01	-48
2014-01-09	15:00:00																											149.05	0.03	0.2504	903.22	27.2613	4.01	1.99	-48
2014-01-09	19:00:00																											166.54	0.04	0.246875	903.72	27.2459	3.93	2.17	-48
2014-01-09	23:00:00																											220.55	0.07	0.24875	904.21	27.2446	3.96	1.7	-48
2014-01-10	03:00:00																											207.05	0.14	0.2552	903.7	27.2393	4.02	1.59	-177
2014-01-10	07:00:00																											186.99	0.06	0.253275	904.55	27.228	4	2.43	-177
2014-01-10	11:00:00																											143.72	0.05	0.2514	904.93	27.2137	4.02	2.44	-177
2014-01-10	15:00:00																											233.78	0.13	0.258625	903.36	27.2113	4.11	2.16	-177
2014-01-10	19:00:00																											66.81	0.04	0.258275	903.3	27.2029	4.11	2.26	-177
2014-01-10	23:00:00																											72.89	0.05	0.2514	904.32	27.2037	4.05	2.39	-177
2014-01-11	03:00:00																											191.43	0.07	0.256425	903.92	27.2379	4.09	2.39	-51
2014-01-11	07:00:00																											219.36	0.12	0.258075	904.31	27.241	4.1	2.46	-51
2014-01-11	11:00:00																											205.52	0.05	0.2602	905.08	27.2092	4.12	2.96	-51
2014-01-11	15:00:00																											185.12	0.12	0.260075	903.63	27.2127	4.1	2.52	-51
2014-01-11	19:00:00																											232.88	0.05	0.267325	902.95	27.1796	4.17	2.74	-51
2014-01-11	23:00:00																											110.86	0.08	0.260025	904.22	27.1963	4.12	2.16	-51
2014-01-12	03:00:00																											173.46	0.03	0.257975	904.12	27.2035	4.11	2.8	41
2014-01-12	07:00:00																											227.13	0.16	0.26485	904.05	27.2299	4.14	2.33	41
2014-01-12	11:00:00																											212.53	0.12	0.27845	905.09	27.1736	4.23	2.64	41
2014-01-12	15:00:00																											142.36	0.05	0.277225	903.97	27.181	4.22	2.74	41
2014-01-12	19:00:00																											121.43	0.03	0.258725	902.75	27.2377	4.08	3.13	41
2014-01-12	23:00:00																											86.14	0.04	0.254425	904.06	27.2415	4.03	3.17	41
2014-01-13	03:00:00																											221.81	0.08	0.253175	904.32	27.2563	3.97	3.18	38
2014-01-13	07:00:00																											102.07	0.03	0.255175	903.89	27.2548	4	4.11	38
2014-01-13	11:00:00																											235.53	0.14	0.25185	905.02	27.2455	3.91	2.48	38
2014-01-13	15:00:00																											227	0.11	0.260825	904.34	27.231	4.06	2.72	38
[truncated: 546 more rows]
